# Supplementary material
Source: publisher figshare collection journal article supplement (https://springernature.figshare.com/ndownloader/files/13564319)
Supplement: Supplementary file 1 [file 13564319]

mnemonic	year	X1_1_6_6_1	X1_1_7_6_1	X1_1_7_4_1	X1_1_9_3_1	X1_1_6_5_1	X1_1_7_2_1	X1_1_7_3_1	X2_2_1_1_1	X1_1_8_4_1	X1_1_4_6_1	X1_1_5_2_1	X1_2_1_1_1	X1_1_7_1_1	X1_2_2_2_1	X1_1_8_3_1	X1_1_8_5_1	X1_1_4_5_1	X1_1_9_1_1	X1_2_2_1_1	X1_1_1_2_2	X1_1_1_5_1	X1_1_4_2_1	X1_1_1_2_1	X1_1_7_7_1	X1_1_3_4_1	X1_1_2_5_1	X1_1_3_2_1	X1_1_2_1_1	X1_1_9_2_1	X1_1_2_6_1	X1_1_8_6_1	X1_1_6_3_1	X1_2_1_2_1	X1_1_2_4_1	X1_1_7_8_1	X1_1_6_2_1	X2_1_2_1_1	X1_1_2_5_2	X1_1_4_7_1	X1_1_4_3_1	X1_1_2_2_1	X1_1_8_1_1	X1_1_3_1_1	X2_1_1_1_1	X1_1_1_4_2	X1_1_6_1_1	X1_1_6_8_1	X1_2_2_3_1
E06000001	2011	0.41861908	0.525397527	0.552283195	0.315316572	0.149889066	0.162167274	0.54397169	1.797079836	0.283922309	0.358078745	0.236304304	0.279139006	0.323831988	0.796955278	0.742722958	0.220677419	0.793489965	0.014401404	0.095865606	0.850547068	0.891144926	0.772300787	1.119741168	0.303163019	0.462990693	0.343883953	0.10657267	0.733758843	0.066098829	2.085611146	0.046530832	0.209022523	0.204762002	0.852751098	0.630704343	0.192032427	1.421090128	0.434535229	0.269389381	0.093840845	0.285424235	0.11404067	0.288093963	0.589679932	0.309224574	0.193371591	0.216234562	0.470990092
E06000002	2011	0.388172097	0.498477372	0.523995139	0.291873419	0.143396643	0.152230586	0.529151051	1.713759206	0.26711835	0.336283205	0.220825583	0.256129162	0.309352386	0.766089689	0.68568488	0.210615791	0.735142946	0.013127065	0.094173549	0.79637362	0.855948847	0.712379466	1.059173287	0.280781223	0.436414604	0.314666612	0.102777513	0.665732173	0.069676833	1.892657295	0.04546865	0.201842847	0.191690335	0.825423422	0.596205974	0.187610961	1.210707489	0.39272581	0.260871827	0.095559816	0.269081743	0.110696547	0.272663108	0.553091915	0.290876109	0.191272833	0.207347032	0.450204796
E06000003	2011	0.441777444	0.537611092	0.573125478	0.321781778	0.158130174	0.172376061	0.566374328	1.795606536	0.290341439	0.370865237	0.244716754	0.291251695	0.33415082	0.795468448	0.759163596	0.226547407	0.816877172	0.015707674	0.094994718	0.878768297	0.910723359	0.799249012	1.14412529	0.314539184	0.481693015	0.351645386	0.111706931	0.761350374	0.068739022	2.132646058	0.047461952	0.216413457	0.214930595	0.872604219	0.63600535	0.198864392	1.49486002	0.456540911	0.278330596	0.089108046	0.295992322	0.11814257	0.307573254	0.61985237	0.31282963	0.204086595	0.227041607	0.480679097
E06000004	2011	0.43885594	0.53960772	0.567150573	0.309761456	0.157905276	0.164786549	0.570945862	1.712407291	0.284116284	0.361495151	0.228696696	0.278103268	0.340189294	0.791811202	0.748511248	0.224534049	0.802930171	0.015586911	0.096835574	0.853222357	0.90671152	0.75015665	1.11315344	0.294514038	0.46572667	0.344045111	0.113387048	0.727473919	0.069411838	2.049690701	0.048526847	0.216434315	0.199718314	0.877250705	0.623053697	0.193784697	1.514841199	0.430119413	0.267903139	0.095540054	0.279407135	0.109084145	0.294254403	0.591041967	0.315515226	0.201380125	0.227304748	0.495003843
E06000005	2011	0.436267125	0.540301458	0.568984529	0.314718642	0.156774955	0.167093645	0.569122646	1.747120029	0.28571179	0.363528155	0.233982564	0.280745526	0.337221442	0.797930899	0.743576515	0.222598399	0.801462982	0.01491621	0.097228687	0.858770462	0.909465998	0.766857298	1.121324211	0.300315761	0.472731162	0.343925598	0.112366943	0.736433051	0.070943767	2.056451175	0.047139472	0.217648278	0.205275076	0.879060814	0.626196142	0.19719115	1.46378748	0.436016473	0.273625345	0.092960566	0.284503897	0.114280398	0.298573855	0.605642748	0.312549521	0.205017748	0.226462238	0.482364093
E06000006	2011	0.430365065	0.541510207	0.563280103	0.314256056	0.15175174	0.163103645	0.55582547	1.786866344	0.287497233	0.362652123	0.231458113	0.278805988	0.333996166	0.804030328	0.749037893	0.222279038	0.806142334	0.014583645	0.096013321	0.853513248	0.897333443	0.75264498	1.12002779	0.298212915	0.465090472	0.349203642	0.111179952	0.734648309	0.067443692	2.082643309	0.047393086	0.213206859	0.201393749	0.867628232	0.632164361	0.191451309	1.490409951	0.43742297	0.266909442	0.096952436	0.28220386	0.109536312	0.287637251	0.597126482	0.317096496	0.197915701	0.222127444	0.484311755
E06000007	2011	0.449638973	0.552542831	0.579899172	0.311404412	0.163203684	0.168856818	0.586795741	1.707598076	0.287408051	0.364304289	0.230409185	0.281139099	0.350728301	0.804149447	0.755293808	0.228605619	0.815487458	0.015788104	0.098639531	0.864526454	0.920303599	0.760222889	1.126980589	0.296727292	0.476049777	0.347856127	0.116305814	0.742514944	0.070460153	2.064908491	0.04903801	0.221911205	0.202994532	0.890782701	0.625437459	0.195650813	1.590520816	0.437256241	0.272638927	0.091434678	0.281767085	0.110407664	0.305846431	0.604599035	0.318619321	0.206316418	0.232504968	0.509069088
E06000008	2011	0.370590918	0.480788519	0.515594796	0.277013766	0.155451981	0.146139696	0.559822612	1.554317703	0.252727196	0.307721592	0.203033738	0.226231986	0.315873252	0.74473867	0.635278373	0.202763206	0.672299482	0.012301143	0.091131594	0.749868845	0.849120505	0.662965887	1.001672971	0.25852771	0.411737455	0.280474401	0.105415481	0.575328825	0.076955475	1.638915387	0.042061127	0.200419954	0.178357726	0.828423124	0.554588724	0.190871176	1.065355322	0.33550799	0.26015138	0.111057423	0.239892868	0.105890128	0.277354864	0.501970977	0.260963102	0.201434588	0.215059596	0.447603769
E06000009	2011	0.426394011	0.523375268	0.558138628	0.310804783	0.153607026	0.167288161	0.557007234	1.821675173	0.286323664	0.358845425	0.238013757	0.277517928	0.323987682	0.793272032	0.731691287	0.218061171	0.78970796	0.015196058	0.093228181	0.860912868	0.888239175	0.769787902	1.12901777	0.306088205	0.468859045	0.338661253	0.108773775	0.715016377	0.070158929	2.071064425	0.046433196	0.212706103	0.209551086	0.857132524	0.631574777	0.199059924	1.371029674	0.436435449	0.273370178	0.095488037	0.292251314	0.116064485	0.294563868	0.611222688	0.304672725	0.20080133	0.220953733	0.463527131
E06000010	2011	0.385878762	0.497430916	0.515999154	0.290977242	0.135802704	0.146476884	0.509121677	1.788418803	0.265821116	0.334021241	0.215514197	0.257075292	0.304041358	0.765213169	0.69339614	0.207117657	0.74425304	0.013106917	0.091563716	0.785625699	0.838586339	0.699686042	1.049488243	0.273627269	0.428321969	0.320302051	0.100275712	0.662012956	0.063806823	1.936761209	0.045242473	0.196036023	0.186163819	0.802431108	0.597487943	0.178721604	1.270771167	0.394333091	0.250724279	0.094011283	0.261660393	0.104009603	0.258374013	0.555061324	0.300351183	0.17952358	0.200611812	0.443309778
E06000011	2011	0.482262072	0.556841602	0.60607755	0.320046832	0.174233659	0.184326527	0.609292224	1.669295872	0.292826299	0.381464499	0.247723385	0.306047169	0.357854921	0.777093659	0.778393709	0.2337323	0.846272275	0.019800298	0.096690943	0.904085028	0.935624542	0.815692853	1.161825022	0.320963759	0.497336573	0.361700312	0.12193168	0.790159009	0.071530373	2.15687555	0.048357828	0.227805146	0.220912703	0.905147357	0.63134982	0.206292519	1.708626326	0.475306149	0.286159097	0.079273223	0.305451563	0.117905613	0.332484652	0.646614188	0.316986025	0.219502088	0.250093038	0.50938103
E06000012	2011	0.425693142	0.521873179	0.554193918	0.308567652	0.151753822	0.163263401	0.547150553	1.736903229	0.279454969	0.356384693	0.232188817	0.279795476	0.325296166	0.771156279	0.737227917	0.218086808	0.790234597	0.015085468	0.093161876	0.844182022	0.88408758	0.757962128	1.101778338	0.297976921	0.460546816	0.339952975	0.108168712	0.72358888	0.066117153	2.049912868	0.047045415	0.209125872	0.203088832	0.845062626	0.615634505	0.190598519	1.458931143	0.434841929	0.266179556	0.090719669	0.281217755	0.110840304	0.290450351	0.590936521	0.308046963	0.196476158	0.218940334	0.468149017
E06000013	2011	0.448232773	0.537408899	0.574702981	0.312827656	0.160562593	0.168579261	0.574733722	1.709335382	0.283426275	0.363260637	0.234121089	0.285506098	0.341860278	0.777631865	0.750223644	0.224058451	0.808648138	0.016020469	0.0955847	0.860803398	0.903723174	0.768605166	1.118384659	0.301711615	0.472504195	0.347216899	0.114094143	0.745683559	0.068701789	2.07227174	0.047150791	0.217537193	0.205874483	0.872405531	0.618411682	0.194956475	1.56268079	0.445360094	0.271363818	0.092211007	0.285001331	0.11136624	0.304636067	0.609135714	0.310562498	0.204625523	0.230214299	0.487387841
E06000014	2011	0.440517633	0.536285972	0.566348963	0.303088152	0.160776411	0.164053549	0.573582522	1.707378994	0.277619151	0.357172984	0.225855261	0.274548793	0.342290146	0.782336301	0.739992253	0.220946247	0.794853739	0.015804948	0.096962897	0.838816366	0.892270319	0.742000323	1.098051164	0.287927248	0.466422561	0.338362439	0.114046558	0.717996385	0.069884112	2.017931224	0.047470271	0.215584212	0.200071186	0.863523186	0.606637812	0.191742233	1.50388761	0.424921593	0.26908392	0.084412909	0.278324647	0.108938948	0.299314265	0.602972963	0.309694893	0.203451528	0.229551088	0.48651635
E06000015	2011	0.405739005	0.515856703	0.544292028	0.289812946	0.159619335	0.155831311	0.564527546	1.586992004	0.264585678	0.336120211	0.214388222	0.250158704	0.332912568	0.77064525	0.684673425	0.211184643	0.734939352	0.014617766	0.098540839	0.790522332	0.872189695	0.697409802	1.050856183	0.271553636	0.442699468	0.310467639	0.110783997	0.652998118	0.075479923	1.833619082	0.045861197	0.211206251	0.188404818	0.852648094	0.579928831	0.193267776	1.312940268	0.38100778	0.265434561	0.105597126	0.263024628	0.108653273	0.292852565	0.545017661	0.288420785	0.20427982	0.220937915	0.478008351
E06000016	2011	0.349353063	0.470770597	0.503756291	0.251305084	0.162067193	0.14021646	0.569990189	1.4146911	0.230848361	0.287727401	0.188623963	0.207759564	0.319448064	0.728756029	0.569352849	0.19245987	0.616591803	0.012559583	0.101163719	0.690924873	0.816772632	0.59809368	0.947062676	0.232584913	0.398626714	0.24922886	0.112562801	0.511504962	0.087188965	1.439853571	0.040130377	0.200876048	0.164131002	0.832706478	0.518729934	0.194100648	0.8913994	0.286224219	0.260570372	0.106797474	0.236255803	0.105532061	0.282285478	0.461537106	0.239166811	0.215048811	0.215620679	0.443189593
E06000017	2011	0.506964846	0.575188415	0.629975331	0.336235255	0.183400138	0.190995563	0.635206145	1.691737865	0.302411301	0.395110491	0.25283472	0.313820759	0.37443146	0.802831465	0.789786744	0.240438429	0.87581526	0.021283854	0.100323932	0.931818923	0.968468525	0.837096596	1.195762168	0.331554347	0.515624193	0.373155073	0.128842399	0.823451065	0.073462795	2.218889346	0.049145269	0.236605696	0.226652497	0.929118517	0.643028355	0.213088945	1.783756527	0.489131227	0.294313688	0.089119647	0.313159596	0.122649505	0.348267281	0.673175282	0.320817235	0.229912691	0.265189567	0.534548469
E06000018	2011	0.349315401	0.479119974	0.493035709	0.263234074	0.141985943	0.134655338	0.509908642	1.599545521	0.246642122	0.308404921	0.199300804	0.221598122	0.304367395	0.76828406	0.611095425	0.197846322	0.668244234	0.012946999	0.110845867	0.716906323	0.806856368	0.622152642	0.979725328	0.239432521	0.405512367	0.282861521	0.100168227	0.588424644	0.073009197	1.686313734	0.043298499	0.195320049	0.16960198	0.799281201	0.548158557	0.178925236	1.072806702	0.330592597	0.248726586	0.096094458	0.242741029	0.106464265	0.259518643	0.515275193	0.269619626	0.190321504	0.196406183	0.446090154
E06000019	2011	0.48128548	0.561896572	0.604695252	0.331546367	0.172148179	0.186955064	0.607715683	1.771047379	0.301226181	0.392036368	0.25320276	0.307984613	0.353623942	0.801364433	0.784407373	0.235938719	0.856275149	0.020020347	0.098330416	0.918289636	0.950737411	0.831264334	1.188872774	0.328645187	0.505058687	0.366389955	0.121124585	0.795958799	0.072896276	2.191414182	0.048422266	0.229762157	0.225196546	0.91373256	0.64737957	0.210946121	1.635728443	0.479896023	0.291317538	0.084621096	0.31151592	0.12128566	0.330596758	0.670398216	0.323652628	0.220306824	0.252503573	0.512309282
E06000020	2011	0.429629428	0.540002381	0.567047861	0.313294738	0.15587948	0.163055551	0.5688194	1.771217757	0.28695741	0.361840159	0.229822288	0.27632401	0.338191291	0.810689325	0.744525058	0.224585065	0.796597003	0.014490463	0.099562809	0.852928797	0.914664729	0.752686385	1.122732516	0.296862589	0.463982838	0.344091793	0.111698629	0.722979789	0.070492817	2.034377092	0.048577683	0.21739291	0.200083231	0.882221433	0.63045147	0.195523274	1.443532218	0.426201678	0.271656558	0.104976739	0.280364106	0.111859256	0.291172166	0.592619657	0.314953434	0.202475447	0.225924338	0.492867982
E06000021	2011	0.417277093	0.522180918	0.552408431	0.304031035	0.153658648	0.15923582	0.55692502	1.758986482	0.276063621	0.349685867	0.227449014	0.267458082	0.32953367	0.788956775	0.716606171	0.217731606	0.773783378	0.014642241	0.097887568	0.826890961	0.886575428	0.736428202	1.098247016	0.289604054	0.457016016	0.332282377	0.109374034	0.699765042	0.070636244	1.985509809	0.047068361	0.21220177	0.196774417	0.8610485	0.612929632	0.194602042	1.362906013	0.412943312	0.26873144	0.099222063	0.277419645	0.111092451	0.288346622	0.588050869	0.304245752	0.20013307	0.2210744	0.47487639
E06000022	2011	0.452513888	0.545133375	0.577064455	0.306259753	0.166632854	0.171663061	0.587464447	1.676616329	0.285338928	0.366512762	0.232712617	0.283330631	0.346679714	0.789136527	0.748160845	0.225046628	0.809664884	0.017990967	0.097781243	0.857402713	0.909148288	0.769342334	1.120369619	0.297497477	0.478115646	0.342752728	0.1178315	0.737651705	0.071819974	2.046309141	0.047971648	0.220262661	0.207684391	0.877341817	0.611108706	0.197524878	1.562836835	0.436637714	0.276932496	0.077870548	0.288011208	0.113660127	0.314333772	0.630217495	0.314488577	0.210264387	0.239549885	0.500687558
E06000023	2011	0.400711579	0.522821148	0.536281672	0.285938427	0.152711875	0.147409838	0.548276748	1.655237005	0.264582013	0.336917801	0.208490406	0.247152094	0.332911744	0.789935841	0.677719263	0.21110735	0.744485755	0.015134091	0.10742731	0.772964629	0.853033434	0.669670099	1.040928834	0.257395069	0.436909793	0.315422171	0.112065218	0.655131333	0.072833605	1.867705616	0.046690193	0.208041521	0.18062405	0.849602436	0.575059983	0.184130164	1.350074504	0.371971948	0.257508035	0.09682335	0.256444949	0.104583054	0.276837212	0.561675806	0.299834418	0.197689838	0.21398166	0.485828622
E06000024	2011	0.487937616	0.567912446	0.612133265	0.327686276	0.178684612	0.18425647	0.619356844	1.670053301	0.293823344	0.385784827	0.245894557	0.302113959	0.365794931	0.791928539	0.786344024	0.236532839	0.855223801	0.020100794	0.099685388	0.903961582	0.947118035	0.809127462	1.164560167	0.316613246	0.505452618	0.362678383	0.124263405	0.789707938	0.073671774	2.162440249	0.049446041	0.231210864	0.219778036	0.918040054	0.629818587	0.207011779	1.755771474	0.469212797	0.287844853	0.086340519	0.301620895	0.11725932	0.337351747	0.645898925	0.320741749	0.220943418	0.254434847	0.525404035
E06000025	2011	0.458481702	0.556048101	0.588033204	0.312481647	0.166171398	0.170836876	0.594850591	1.665034571	0.293003619	0.371290206	0.233551672	0.284682889	0.354681468	0.803646651	0.764955567	0.229877251	0.825144254	0.017020832	0.099695185	0.879217869	0.933406134	0.77020644	1.138868704	0.300648797	0.479920597	0.353879372	0.118423162	0.752353347	0.071285185	2.087872096	0.049732199	0.225033764	0.204624305	0.901301076	0.628768934	0.199541084	1.609136634	0.444148616	0.275987245	0.094389722	0.286425876	0.111265193	0.309473946	0.614255848	0.322098395	0.210542278	0.237538165	0.516592997
E06000026	2011	0.429165345	0.532143225	0.557383004	0.307628875	0.154141413	0.161817592	0.558876425	1.790643753	0.281017055	0.356265086	0.22787146	0.272817167	0.332873803	0.798003378	0.734218085	0.221020981	0.790055359	0.01528803	0.097431387	0.838537829	0.890018612	0.745415466	1.104005612	0.290417373	0.461255655	0.3401896	0.111084091	0.719295963	0.068538846	2.031739691	0.047214374	0.213310677	0.199410206	0.857479414	0.615878098	0.190464444	1.443470733	0.424214941	0.268338028	0.090039739	0.278556049	0.110610869	0.291855445	0.608379512	0.310609915	0.198760216	0.22468691	0.480117615
E06000027	2011	0.477723755	0.553049369	0.600287472	0.329789712	0.172084186	0.185983148	0.601365456	1.767225193	0.296352131	0.386337534	0.256859061	0.305045055	0.34807094	0.790122364	0.778304615	0.232336896	0.844398483	0.018916656	0.097275859	0.914725418	0.934681138	0.833340829	1.178837267	0.330093237	0.504763092	0.359943332	0.119435934	0.785510727	0.073095401	2.188896026	0.047338701	0.227736471	0.227411759	0.905165794	0.642526008	0.21195526	1.570136062	0.479667957	0.292957811	0.083180954	0.311550066	0.123507433	0.332926369	0.663066829	0.314376916	0.219707572	0.248371532	0.493642394
E06000028	2011	0.428167329	0.533188688	0.558709264	0.298311397	0.160018499	0.160827287	0.56986552	1.707746757	0.272995391	0.352348034	0.224407154	0.26908654	0.3387732	0.781230515	0.723442938	0.214646105	0.784142842	0.016438176	0.097775825	0.820739384	0.883805886	0.733073304	1.089907149	0.281868263	0.464071851	0.329690388	0.113213453	0.692536567	0.072266072	1.981644651	0.046444539	0.213461658	0.197880243	0.853883604	0.596055371	0.193782721	1.447293407	0.410193113	0.270747932	0.085580348	0.275237879	0.107999143	0.298209346	0.60439069	0.311038772	0.202901421	0.228286579	0.480028983
E06000029	2011	0.4698783	0.558631407	0.596648156	0.321441833	0.170110654	0.178071466	0.599763793	1.715048368	0.293743297	0.380263259	0.245003371	0.293252357	0.355103082	0.797535595	0.772895217	0.228028481	0.836927606	0.018118112	0.098156021	0.898743974	0.933156884	0.80118776	1.161725964	0.313297163	0.497423271	0.357820446	0.119112273	0.761934701	0.07190528	2.136652692	0.047979667	0.227318829	0.217111793	0.900012426	0.634617749	0.20689225	1.615221871	0.463734393	0.284625401	0.092379684	0.297373882	0.116057799	0.323798544	0.64555445	0.3191684	0.216053066	0.242843201	0.506003444
E06000030	2011	0.428539049	0.544806619	0.570763201	0.303264044	0.162883894	0.161131209	0.583389949	1.657260213	0.277457285	0.352321534	0.222610552	0.269167915	0.348120181	0.797468922	0.728184528	0.221526986	0.786874234	0.015382935	0.100450767	0.83243713	0.91031727	0.728851631	1.102166341	0.282616009	0.459029362	0.334760346	0.115558499	0.698018172	0.073571088	1.974926439	0.048275449	0.218624348	0.194760835	0.879955784	0.612361292	0.195454365	1.496191179	0.40556461	0.269505176	0.102259196	0.272052886	0.107859149	0.296518253	0.57222156	0.311044749	0.204617465	0.228997405	0.505505586
E06000031	2011	0.411068899	0.52822917	0.553823863	0.30704146	0.157048127	0.156577715	0.57201324	1.703881718	0.27552771	0.347481308	0.220284102	0.256223068	0.335901832	0.798669579	0.706020027	0.21688112	0.760668335	0.014060457	0.099025043	0.818578525	0.896866757	0.715119261	1.086291302	0.280157785	0.447901111	0.323469239	0.110162379	0.671954634	0.073839349	1.913683843	0.046665732	0.21350435	0.190481668	0.875868308	0.606170996	0.196389241	1.33288332	0.390484768	0.268699795	0.116619182	0.26822759	0.108849992	0.28806871	0.560909211	0.299439083	0.20196696	0.221971632	0.490167244
E06000032	2011	0.367734182	0.497365149	0.519890141	0.267654328	0.164329178	0.145256584	0.569851949	1.4135006	0.242858546	0.310030597	0.194903951	0.216340626	0.332293233	0.759813843	0.598069756	0.201982359	0.648740715	0.013969633	0.108451321	0.711501506	0.846840608	0.616777952	0.977202793	0.238264694	0.413976127	0.272674436	0.116278269	0.564584515	0.085856336	1.546502134	0.04371916	0.208859319	0.16696535	0.850349589	0.534566496	0.19642786	1.037666485	0.307657782	0.260301017	0.125593405	0.23828137	0.106260004	0.289267603	0.474067181	0.257298963	0.215641258	0.216850356	0.479108997
E06000033	2011	0.454893839	0.558421748	0.58762946	0.323382169	0.167555951	0.171880333	0.59286492	1.721583516	0.28876072	0.375190538	0.23714901	0.283568914	0.353667204	0.814258489	0.755976153	0.230793373	0.824167458	0.017140824	0.104394493	0.872899696	0.935290192	0.775666773	1.144644733	0.302173656	0.487613407	0.350437637	0.118781753	0.746846959	0.074244937	2.089633827	0.049691752	0.225209977	0.209054685	0.901281125	0.627379027	0.202347188	1.573085065	0.437357034	0.280539086	0.099300955	0.289551075	0.115483567	0.312826347	0.614946762	0.320365451	0.212543346	0.23830865	0.516477859
E06000034	2011	0.423137357	0.548968437	0.56636887	0.31458313	0.157377684	0.157827684	0.569987173	1.670789622	0.283444337	0.365780048	0.225210801	0.266520331	0.346809031	0.826681463	0.728065792	0.226750577	0.791997097	0.01482913	0.110592451	0.835188737	0.923612023	0.72923742	1.10995857	0.284218259	0.459093899	0.341404792	0.113626506	0.716241287	0.072417766	2.001884636	0.051409821	0.218793541	0.191675958	0.892214092	0.619810695	0.194615535	1.452287663	0.407209745	0.268770112	0.117286021	0.27360105	0.111206365	0.285864738	0.564581358	0.31952415	0.204946455	0.22309579	0.518982672
E06000035	2011	0.441517767	0.553252508	0.57921946	0.317421486	0.163637991	0.164666605	0.586274466	1.744851941	0.288652548	0.365519514	0.230694429	0.27708871	0.351590117	0.824944121	0.757648662	0.229180228	0.81260655	0.01579287	0.102416432	0.85665701	0.926919397	0.757288503	1.129860718	0.295257558	0.471993524	0.348067781	0.114860365	0.737165809	0.071446073	2.061122003	0.049767058	0.219939961	0.201471084	0.898947118	0.628247731	0.195154398	1.558266979	0.426844443	0.275464841	0.105530143	0.280774028	0.111761385	0.301387162	0.594483166	0.319020736	0.204601833	0.231492042	0.513574807
E06000036	2011	0.47415493	0.592828275	0.617248521	0.322926344	0.17439596	0.170620957	0.623280899	1.712856904	0.295233797	0.378695386	0.229879553	0.288180204	0.380939041	0.846936425	0.784915115	0.238827178	0.854448792	0.017605846	0.107772803	0.883189911	0.966795137	0.757533359	1.15390182	0.292226799	0.492996243	0.364006943	0.12727169	0.764544935	0.075929819	2.125723375	0.05327728	0.23493789	0.202251646	0.94016758	0.63922207	0.201783555	1.752810667	0.435548362	0.278415069	0.10635257	0.284796826	0.108549729	0.31235089	0.605315977	0.337168106	0.215200753	0.245302856	0.555534749
E06000037	2011	0.483722017	0.587170484	0.623990879	0.324791227	0.178234105	0.179496153	0.631433468	1.683170593	0.296489427	0.384776547	0.238830812	0.296629902	0.377200603	0.821316604	0.788617029	0.23943235	0.862162574	0.019138994	0.103764489	0.900630696	0.966336203	0.789862327	1.173522998	0.307320491	0.501352288	0.368352579	0.128984495	0.779726668	0.076249235	2.14381977	0.051788043	0.235172077	0.212684595	0.937950903	0.638879804	0.206084222	1.789488587	0.453340485	0.28604801	0.097853726	0.295439002	0.113100183	0.327654912	0.624572874	0.330362719	0.218871578	0.254401897	0.551145729
E06000038	2011	0.407533243	0.53908333	0.566834474	0.288443797	0.173772063	0.153460422	0.602876186	1.564892945	0.255682393	0.333553767	0.204812756	0.24341937	0.361883198	0.80725984	0.671872968	0.214507631	0.731395866	0.015584674	0.111950949	0.765391516	0.888500746	0.655958319	1.043192141	0.252706677	0.440216692	0.303983124	0.121401669	0.634579906	0.083659947	1.764111689	0.046939533	0.221178283	0.178297639	0.890935061	0.574129327	0.197245079	1.329218925	0.346379647	0.269623371	0.123247502	0.257133968	0.104656546	0.299473874	0.521220784	0.288245012	0.213675096	0.226629546	0.509199907
E06000039	2011	0.370908244	0.510550004	0.538123143	0.271450302	0.190653029	0.149662432	0.620806229	1.325457669	0.23037218	0.300232026	0.185122946	0.204686097	0.360412632	0.77946884	0.580183973	0.200634657	0.618497786	0.014811785	0.113222176	0.68664384	0.872462698	0.592934669	0.960242659	0.224929582	0.404915271	0.249213282	0.12532859	0.539610957	0.096330466	1.390929013	0.045065149	0.219901871	0.160237055	0.912322195	0.51892013	0.205912456	0.935750466	0.266640394	0.270251836	0.152145928	0.227705847	0.103903579	0.323146723	0.428380698	0.239411475	0.232526937	0.228221422	0.497298473
E06000040	2011	0.497700608	0.602379753	0.644270137	0.319385528	0.199670718	0.186006594	0.669919202	1.575077803	0.281698537	0.373276128	0.229759739	0.292452727	0.397389286	0.805202743	0.782736119	0.240635609	0.855376972	0.021309988	0.10837707	0.868109765	0.966397974	0.773551694	1.143376344	0.296079839	0.505271295	0.351045343	0.137000069	0.762838207	0.082612842	2.048633706	0.052709078	0.24072813	0.210512817	0.949932049	0.60573871	0.209053067	1.884170627	0.427408989	0.290508197	0.091895798	0.289382766	0.112803664	0.359503674	0.606392706	0.317111714	0.230125767	0.265021999	0.567009541
E06000041	2011	0.493069523	0.5973312	0.63177692	0.320947492	0.189483711	0.184165075	0.654807062	1.599139341	0.290925546	0.379026622	0.233024346	0.293171123	0.390462888	0.816959667	0.787860531	0.242586221	0.860373199	0.019363255	0.106853068	0.888990386	0.979925397	0.784471852	1.160246616	0.300010107	0.501211583	0.361419952	0.134115313	0.771794902	0.080286196	2.08426164	0.052561518	0.23933681	0.210837845	0.949609969	0.626492777	0.207547012	1.843462409	0.440117301	0.287590453	0.096571184	0.292014563	0.113236318	0.343170048	0.609501687	0.32732765	0.226903233	0.259399665	0.569214016
E06000042	2011	0.432013521	0.564445501	0.580320532	0.30851567	0.169250319	0.161323624	0.602294958	1.632074866	0.277472699	0.356378108	0.217682051	0.261452554	0.362744114	0.82677142	0.717933004	0.22810024	0.785592048	0.015733841	0.111734971	0.818385253	0.923648132	0.705688289	1.094013197	0.273644232	0.460580603	0.333934928	0.12300765	0.699233301	0.078247139	1.933056154	0.050367127	0.225480207	0.188750367	0.916975312	0.607053244	0.197709548	1.527565723	0.38933305	0.270606533	0.116524528	0.268249608	0.107970609	0.301205119	0.560736651	0.313681117	0.212042252	0.23172453	0.534796492
E06000043	2011	0.430281161	0.55768899	0.570755898	0.291327657	0.165227251	0.15735586	0.590096931	1.713691741	0.275091419	0.347975194	0.216782077	0.268901051	0.356410655	0.816776759	0.725229344	0.218079689	0.795370447	0.016777428	0.103691945	0.814853342	0.898121966	0.713808672	1.094575051	0.270273679	0.467626171	0.332636885	0.120491036	0.676590914	0.076123765	1.973747288	0.048850394	0.21749648	0.192793744	0.881842901	0.602553905	0.192502985	1.489739757	0.392238795	0.272748645	0.077605075	0.266434764	0.106207233	0.299544636	0.596896745	0.320529915	0.205568333	0.234727949	0.511339195
E06000044	2011	0.412656772	0.529355995	0.542991754	0.298413558	0.148243378	0.15148204	0.546843954	1.776805232	0.277136101	0.349581381	0.217517221	0.259375541	0.330206194	0.809001032	0.718073309	0.216173466	0.773163813	0.015364717	0.10021496	0.810499679	0.880213262	0.706362609	1.081393959	0.273482008	0.448586091	0.332875666	0.10972315	0.681409942	0.068423465	1.966412791	0.048523375	0.211092377	0.187159336	0.848784099	0.604862274	0.185425998	1.369002059	0.398979953	0.262233485	0.093442553	0.265251404	0.105685387	0.274049699	0.582817742	0.31454353	0.193045801	0.21831295	0.485897107
E06000045	2011	0.402636618	0.522880146	0.543919193	0.296191713	0.155886752	0.150201122	0.560708673	1.752580311	0.266681002	0.337822737	0.21236847	0.250422489	0.333881209	0.803607598	0.6990025	0.21209553	0.747575343	0.014190949	0.101771494	0.789083793	0.877042469	0.690457448	1.058808795	0.265557728	0.441843857	0.316916556	0.110258053	0.656637018	0.07325146	1.876653286	0.04583067	0.210032025	0.184936075	0.855157025	0.591144006	0.18774904	1.292692684	0.376573518	0.264827451	0.105480833	0.261847263	0.106394451	0.283076907	0.568117085	0.297191834	0.199565687	0.219150711	0.474011364
E06000046	2011	0.495561707	0.57390436	0.623644396	0.346135853	0.179598401	0.194130922	0.622039558	1.821936223	0.309611955	0.401216294	0.269732025	0.317253384	0.362969962	0.827626124	0.815482826	0.241588009	0.873361084	0.01869508	0.101041421	0.954542573	0.974208982	0.87868842	1.226802844	0.346443016	0.52783853	0.375955302	0.122747972	0.827931394	0.074835085	2.279658774	0.049640299	0.235156054	0.240277669	0.925572173	0.664400496	0.21807883	1.640845352	0.500758567	0.304621827	0.086673097	0.325631629	0.130803337	0.350833983	0.691967113	0.322332774	0.228452743	0.254429009	0.512354072
E06000047	2011	0.455878888	0.552361898	0.584433981	0.323966573	0.160570967	0.172588717	0.579880333	1.818356844	0.29418935	0.373657931	0.242629716	0.293489243	0.345957723	0.813722102	0.768849893	0.229545121	0.830824945	0.015820377	0.097738719	0.887944092	0.920471046	0.794398563	1.156352573	0.312158641	0.486386241	0.358499146	0.114790235	0.772879419	0.068508555	2.165871997	0.047796396	0.221176536	0.213482679	0.889649999	0.643950804	0.198560861	1.574389694	0.461472927	0.277934216	0.091134619	0.295524964	0.115809911	0.309090146	0.635299111	0.318939027	0.207127978	0.230956468	0.492179652
E06000049	2011	0.476695506	0.56528869	0.602433422	0.322252098	0.1712252	0.180367147	0.605177689	1.700811315	0.29482513	0.3827454	0.243121969	0.298724475	0.357489329	0.798189927	0.782421597	0.235070953	0.850067934	0.018854544	0.098768448	0.902121419	0.94075963	0.80066369	1.164531218	0.314367534	0.497767364	0.362995344	0.121194593	0.780771005	0.071544234	2.15922434	0.049716114	0.228013714	0.216106721	0.913513232	0.637356723	0.204105939	1.716519793	0.46448565	0.28271688	0.085204519	0.298538122	0.115028241	0.322797669	0.641658613	0.324864498	0.215184197	0.247709228	0.522967847
E06000050	2011	0.465012358	0.558527613	0.592758528	0.319228096	0.166211221	0.174789137	0.593437788	1.738145353	0.291505329	0.375441552	0.240359219	0.293026824	0.353017992	0.79922537	0.77421788	0.23140307	0.836240077	0.016966121	0.097768652	0.888212158	0.927776385	0.788104401	1.152997035	0.309291011	0.490595581	0.358228455	0.118103873	0.768885185	0.070131452	2.141663805	0.0488824	0.224946834	0.213157947	0.896834666	0.634421437	0.200376187	1.650956467	0.459126793	0.279274908	0.087696311	0.29338229	0.11359729	0.314788138	0.63172549	0.321542422	0.21021127	0.239092381	0.508117277
E06000051	2011	0.48895507	0.569525924	0.615360972	0.328224287	0.175454649	0.185997078	0.617311926	1.745709919	0.301002085	0.390362165	0.25213489	0.30868692	0.362932907	0.803019569	0.796307716	0.238082267	0.863014535	0.020191024	0.099786243	0.922397428	0.954625495	0.827213877	1.189901834	0.326189027	0.510034059	0.370421748	0.123431012	0.79962679	0.073128631	2.203277131	0.049402502	0.232355102	0.224144836	0.925909517	0.646408863	0.210137684	1.717298813	0.482775135	0.291813523	0.085666523	0.309756789	0.119603792	0.334923344	0.664032712	0.326015109	0.221471594	0.254020486	0.521401192
E06000052	2011	0.4825609	0.559566022	0.606401083	0.329257079	0.172613721	0.186894949	0.605019071	1.733648976	0.299678654	0.391663937	0.254744001	0.307207214	0.354041734	0.790162829	0.784784552	0.234215513	0.856361451	0.021182125	0.096650329	0.91747379	0.940928687	0.829842857	1.18372788	0.32958868	0.50395719	0.367328004	0.121574778	0.793867403	0.072313575	2.195317236	0.048235338	0.228006414	0.22638954	0.904127836	0.642439644	0.209214934	1.647729572	0.481997601	0.291320802	0.082506772	0.31212933	0.120955612	0.332379335	0.663092166	0.322275846	0.218467587	0.253295809	0.509396353
E06000053	2011	0.514810427	0.59818682	0.680184825	0.312969195	0.213532514	0.184402362	0.696622703	1.606149027	0.279608628	0.409282847	0.253077454	0.317349115	0.423699588	0.817486799	0.717269163	0.234922433	0.913303153	0.031257704	0.112421019	0.921050182	1.006178793	0.825518332	1.211522352	0.330723644	0.544788791	0.370433013	0.120255912	0.829050376	0.079212324	2.246192284	0.057372201	0.250814984	0.241193884	1.023396813	0.639834811	0.221563544	1.899579415	0.493612114	0.323790275	0.066845716	0.348458726	0.127556643	0.413108189	0.545491788	0.355908954	0.264709039	0.282880718	0.558563486
E06000054	2011	0.476197724	0.564392123	0.60050583	0.324375875	0.169050685	0.178367711	0.602176928	1.687334239	0.297912482	0.38507651	0.242061546	0.298458553	0.357423028	0.799784502	0.782704891	0.23472937	0.849320285	0.019300656	0.099036151	0.902538914	0.945892599	0.795520373	1.163852058	0.312606303	0.494484033	0.364707439	0.12160371	0.780808056	0.07126113	2.152786703	0.050048636	0.228625509	0.21412859	0.91068458	0.63882181	0.203348736	1.693290615	0.463852778	0.2806832	0.090089597	0.296623652	0.114411776	0.317274422	0.63354459	0.327746424	0.214195893	0.24694151	0.524598336
E06000055	2011	0.442478599	0.546117865	0.585552626	0.296031097	0.178502343	0.169780355	0.61899344	1.562753315	0.275447718	0.355819217	0.221686761	0.264553023	0.361494216	0.793208512	0.710671824	0.222551038	0.773174049	0.018691355	0.10512234	0.829744966	0.920546484	0.73302484	1.09749923	0.283663834	0.465523221	0.326817322	0.127525686	0.693152551	0.083362629	1.898342088	0.048770535	0.226826521	0.195432435	0.922200417	0.596105787	0.207018753	1.451695033	0.399206852	0.278556717	0.105219652	0.277536419	0.112805742	0.321915077	0.567023269	0.299534827	0.224361515	0.242468734	0.51844252
E06000056	2011	0.474504108	0.578274445	0.608493719	0.319791441	0.173999892	0.176166418	0.617104958	1.658541345	0.294756135	0.382336193	0.235842916	0.293819442	0.370099897	0.817742981	0.774703649	0.236964181	0.849626329	0.020130153	0.10579077	0.886087836	0.953765301	0.778118232	1.155381056	0.30186377	0.492068379	0.363121584	0.126626139	0.773771328	0.074744787	2.12280721	0.051387366	0.231857945	0.208275346	0.934141451	0.632824819	0.203055199	1.755738167	0.447963391	0.280387828	0.093007532	0.292307797	0.112870488	0.320024037	0.619309633	0.332252785	0.218036608	0.249926802	0.54781235
E06000057	2011	0.474794122	0.558914568	0.601815573	0.324003575	0.169590456	0.182547026	0.601307695	1.722875639	0.295119198	0.383041267	0.25083354	0.306454032	0.35420299	0.791940953	0.783471709	0.235109284	0.849358563	0.018298248	0.097491991	0.906603239	0.937434147	0.82061877	1.172201981	0.323478467	0.498283381	0.365433213	0.120364255	0.794341172	0.071270311	2.186582685	0.048516874	0.22698333	0.221345666	0.907887698	0.642848652	0.205844379	1.66425238	0.476353789	0.286812456	0.078707779	0.306570203	0.118929977	0.326548683	0.647460962	0.322424613	0.215793539	0.246674324	0.506791058
E07000004	2011	0.473283409	0.58132767	0.617291391	0.319327683	0.176272856	0.177907572	0.625599467	1.691479837	0.293506487	0.379195384	0.235822956	0.294779859	0.369949321	0.818314021	0.782135675	0.23735875	0.849770551	0.018306952	0.104296426	0.888951033	0.961564287	0.782134703	1.1599811	0.303302873	0.4950603	0.36102079	0.128175306	0.763631654	0.076613818	2.10915137	0.05210109	0.233404494	0.208989723	0.93111492	0.635452076	0.205917107	1.7428935	0.441631805	0.282493358	0.094132581	0.292729942	0.113186267	0.325767118	0.619600456	0.328114774	0.219079578	0.250852615	0.548434209
E07000005	2011	0.517852961	0.595545914	0.645741044	0.322878418	0.19728414	0.194643761	0.664598919	1.555843407	0.294592317	0.3898192	0.241202385	0.304811251	0.389017873	0.792084703	0.80465062	0.247494115	0.880709746	0.024498172	0.104806675	0.915668104	0.982028301	0.812625105	1.173701888	0.313894534	0.518409182	0.370092336	0.137488929	0.806589678	0.079089724	2.148343985	0.053270994	0.243483045	0.220430734	0.954972073	0.622078467	0.212801315	1.968341906	0.467055511	0.291652992	0.082805192	0.305180173	0.115840447	0.360324674	0.637311405	0.32491322	0.232314215	0.272724912	0.57858882
E07000006	2011	0.509328076	0.591389034	0.641314776	0.321312483	0.199576538	0.191196701	0.66630991	1.574994003	0.290117057	0.383850037	0.239026802	0.298129837	0.391553578	0.793862434	0.789630041	0.239536101	0.858216426	0.024100011	0.105610746	0.896649785	0.975216514	0.805185526	1.163483578	0.309311564	0.516430513	0.357726016	0.135625383	0.78332393	0.082256837	2.085557428	0.052298997	0.241184911	0.218137272	0.9516814	0.612960548	0.214414095	1.866138912	0.44868525	0.294522727	0.086877893	0.29980472	0.11769999	0.363054076	0.631172875	0.316735459	0.234196734	0.272544793	0.565290784
E07000007	2011	0.466820078	0.574736438	0.612574356	0.309151675	0.186222537	0.177780493	0.638490574	1.607610972	0.279298007	0.36317259	0.226153658	0.276436237	0.375032227	0.804309694	0.755775591	0.232081824	0.811310305	0.018538383	0.107852907	0.847776459	0.943906253	0.755079788	1.120812319	0.290224563	0.484372579	0.337526096	0.130344271	0.728770078	0.081591216	1.970715994	0.050261065	0.232972142	0.203549472	0.929925834	0.604766961	0.205390908	1.686953465	0.411741394	0.282332973	0.10129736	0.282884745	0.112702626	0.336818439	0.595642735	0.306383555	0.224318112	0.249892262	0.537681369
E07000008	2011	0.432000049	0.559422197	0.58774335	0.297818885	0.177156745	0.158179608	0.610793924	1.672541541	0.261820191	0.341431374	0.212226163	0.260884329	0.371850031	0.824889411	0.720245561	0.221255992	0.774926818	0.016289528	0.112358705	0.794646347	0.902718808	0.696047074	1.076323121	0.26410625	0.464300373	0.320941446	0.123484841	0.68073958	0.079892867	1.910391597	0.047566951	0.224293258	0.188887492	0.906933219	0.590841093	0.194139427	1.505462523	0.377197962	0.276647405	0.099665432	0.266822147	0.105690268	0.3147432	0.576277441	0.303843785	0.211662497	0.234051113	0.514718805
E07000009	2011	0.483481059	0.576647321	0.615093567	0.322809623	0.173672016	0.176451506	0.621098768	1.716658398	0.3000531	0.387472038	0.240012904	0.296191174	0.37261502	0.816926703	0.794251921	0.235862011	0.862858915	0.019082543	0.101827677	0.909365257	0.959298735	0.793760071	1.172604389	0.31064237	0.501878996	0.366153873	0.120564867	0.778194662	0.071592606	2.172223133	0.052182519	0.230598636	0.213447005	0.935159744	0.642010331	0.205836111	1.749773095	0.464932462	0.284471504	0.098358075	0.294891935	0.111984474	0.325885768	0.649571671	0.333324093	0.214458413	0.246196169	0.540597782
E07000010	2011	0.467117207	0.5579133	0.597890998	0.328182448	0.169644192	0.180006798	0.6006421	1.765244964	0.29734309	0.381867871	0.250862647	0.299663508	0.353038401	0.808545836	0.776714855	0.231488766	0.838070919	0.017382663	0.099414507	0.902734646	0.941160409	0.819265655	1.172926793	0.321915314	0.498822663	0.359651478	0.118122731	0.777197818	0.073050345	2.158266961	0.048216643	0.226534419	0.220123927	0.907375975	0.643136352	0.208909735	1.573183021	0.467682541	0.290100127	0.089155479	0.303823649	0.121304025	0.325619625	0.65562139	0.317431078	0.217657234	0.244621637	0.502365044
E07000011	2011	0.477147582	0.578215634	0.609376112	0.321338871	0.172862399	0.177502023	0.615360362	1.711271841	0.298002735	0.381279853	0.238332315	0.298928286	0.368751882	0.816608269	0.788672285	0.2365781	0.857551065	0.01840298	0.102185849	0.897244031	0.954400683	0.790960414	1.163966314	0.307621457	0.495755538	0.366159185	0.123153926	0.779778222	0.072590863	2.15538214	0.050793656	0.230373438	0.212122214	0.924253342	0.639512868	0.201788714	1.767211333	0.458308826	0.281987968	0.089489454	0.294121852	0.112825863	0.322329434	0.636646446	0.332912272	0.215094895	0.248609639	0.538826538
E07000012	2011	0.498364147	0.592187603	0.63029101	0.319732454	0.183919099	0.182422354	0.641955566	1.628556891	0.293597513	0.386092786	0.23482806	0.297780123	0.38383306	0.802785388	0.796190219	0.24152638	0.872727065	0.022741584	0.103479073	0.903733994	0.966416116	0.78309739	1.161414791	0.302763161	0.50369475	0.36804461	0.130061447	0.780407323	0.075118886	2.147232458	0.052503809	0.237496424	0.210655991	0.940810895	0.629240049	0.205633814	1.903118455	0.45786674	0.282354444	0.089591068	0.291958884	0.109449073	0.335659454	0.629911419	0.333430145	0.222358949	0.258775003	0.563212846
E07000026	2011	0.467173948	0.554198906	0.597721135	0.328348616	0.168311906	0.182408413	0.593824651	1.767606508	0.296916436	0.383880717	0.251686489	0.305125126	0.347275747	0.797707842	0.778748282	0.233077571	0.845546046	0.018030493	0.096381378	0.906364814	0.93573485	0.823371607	1.172817831	0.324774077	0.496915337	0.362392786	0.117825421	0.789928395	0.070411521	2.184874158	0.04801137	0.224768435	0.223051812	0.898807044	0.643889002	0.205487643	1.638256276	0.474354802	0.286903136	0.085845896	0.307239804	0.120184016	0.325561259	0.648641169	0.319025053	0.213590653	0.242586496	0.500312095
E07000027	2011	0.439923405	0.537939031	0.574091197	0.318487629	0.156692517	0.169507217	0.56513204	1.788501703	0.289659841	0.366717038	0.245464163	0.290403392	0.336859896	0.798629358	0.762425597	0.226850102	0.818438756	0.01510809	0.096674416	0.88184755	0.910304772	0.799009127	1.148064625	0.312850676	0.478599688	0.354834899	0.111053894	0.754079382	0.067443239	2.140916989	0.047977925	0.216810239	0.213098403	0.867421415	0.639900064	0.198154322	1.504607583	0.451822756	0.276874974	0.08888169	0.29418565	0.117038459	0.302326192	0.617971422	0.314478057	0.202611901	0.224344229	0.481549618
E07000028	2011	0.456319879	0.55032028	0.581427467	0.314203629	0.158254819	0.17200577	0.578434049	1.778090298	0.291887745	0.373827632	0.24113534	0.294686456	0.341295843	0.789928844	0.768938529	0.228323265	0.830298748	0.01736239	0.096460801	0.88857612	0.915633596	0.781872096	1.152089172	0.308533191	0.481800662	0.358398868	0.11500702	0.748962152	0.068957536	2.146074695	0.047241415	0.221367487	0.21100977	0.887715032	0.643624378	0.201121892	1.565952728	0.458677414	0.276038922	0.085864066	0.291766605	0.111685059	0.29938644	0.633214653	0.324335556	0.205954	0.234653446	0.490853064
E07000029	2011	0.470499364	0.56584692	0.601224331	0.325593021	0.168009713	0.177824502	0.595683236	1.770730318	0.290578203	0.3762219	0.246654993	0.303234546	0.355384023	0.804047336	0.791012319	0.235197908	0.854064507	0.016433882	0.0977051	0.897028627	0.932314146	0.808638117	1.169921856	0.315796974	0.499080974	0.366362301	0.118039619	0.794088687	0.069592605	2.207146645	0.049530536	0.225556086	0.218631089	0.900004652	0.644260155	0.200350445	1.774188468	0.473043289	0.282411338	0.08917888	0.302248315	0.114659204	0.31954081	0.64140646	0.325063529	0.21034763	0.237997354	0.509303649
E07000030	2011	0.486496841	0.560731795	0.612363083	0.324284439	0.173693829	0.189172638	0.609172135	1.715771665	0.298085345	0.39228574	0.255285708	0.315037358	0.356248401	0.773807132	0.792304201	0.236373165	0.864514963	0.023180171	0.095063279	0.922384019	0.942462344	0.836654393	1.189786732	0.332808762	0.503193112	0.372306309	0.123712757	0.797606491	0.072029979	2.207653935	0.049087795	0.2285323	0.227261587	0.902531011	0.643031465	0.209763535	1.722258266	0.486676621	0.291729356	0.073549323	0.315059408	0.120183515	0.334279338	0.677655724	0.326186554	0.218460997	0.257453336	0.51634581
E07000031	2011	0.516419133	0.577254977	0.633191113	0.337947977	0.184042078	0.196841983	0.635351987	1.709999751	0.303288395	0.402849385	0.261765009	0.320923484	0.371884755	0.792502114	0.806796243	0.241514352	0.885585224	0.02475824	0.098734945	0.946853569	0.965754584	0.85666984	1.210543375	0.339392106	0.525992455	0.378699522	0.129427428	0.829848995	0.074879389	2.255827846	0.048282009	0.237963077	0.235027882	0.936324784	0.648269455	0.216541575	1.792562559	0.503491547	0.300015218	0.075581543	0.321943431	0.124295635	0.354845938	0.69529832	0.325948055	0.231704179	0.269087525	0.526003738
E07000032	2011	0.477212387	0.56489982	0.602431641	0.321816149	0.166598326	0.178911039	0.600865575	1.764607006	0.299009991	0.384640517	0.244586794	0.305783189	0.358206594	0.800530274	0.785581499	0.234230032	0.855688754	0.019337667	0.098445798	0.905377434	0.938990906	0.801539918	1.169678867	0.316329506	0.496457325	0.367909632	0.1208048	0.783889798	0.070298963	2.193846427	0.049255426	0.227056137	0.216002204	0.910605904	0.647097119	0.202933486	1.692032231	0.474229516	0.281786038	0.08090546	0.298168296	0.114788417	0.317578964	0.641991575	0.330085619	0.213517943	0.245697511	0.516070602
E07000033	2011	0.457519482	0.554742	0.585772438	0.318449056	0.159835827	0.172692534	0.581859849	1.805600549	0.295335265	0.374632676	0.241408066	0.294188394	0.347933474	0.803945465	0.77550394	0.228323711	0.831501248	0.016628739	0.097506281	0.890449388	0.923458863	0.785793569	1.155978653	0.31061912	0.488559963	0.359073875	0.115778946	0.756503229	0.069348228	2.151630575	0.048663671	0.223094237	0.21219053	0.888468059	0.642550131	0.201177826	1.579888333	0.462340478	0.278102293	0.087904084	0.292178993	0.1136267	0.305219832	0.624272612	0.324931036	0.207874646	0.232231839	0.495983544
E07000034	2011	0.461413244	0.555465779	0.589536799	0.324576692	0.160909653	0.173457584	0.582037308	1.80629142	0.296599643	0.378583434	0.244660041	0.298179852	0.348202525	0.81286559	0.778852591	0.23072217	0.840303596	0.017007443	0.097529513	0.897545171	0.931331707	0.800763753	1.165746031	0.314416206	0.489695079	0.364001858	0.116061822	0.768670106	0.068551239	2.186686222	0.048552927	0.222669616	0.214970702	0.892806201	0.649120739	0.201668861	1.594911081	0.465177944	0.278724063	0.088405591	0.296708367	0.115061106	0.307978579	0.636189527	0.325869846	0.207744474	0.234672281	0.499041854
E07000035	2011	0.518139461	0.578095598	0.637370149	0.328975897	0.189536094	0.196955478	0.64515372	1.639171418	0.299834906	0.401112651	0.255778076	0.321153969	0.377061206	0.775124027	0.805245429	0.241322895	0.884138774	0.02981045	0.099658728	0.93112533	0.963630266	0.843471943	1.189469857	0.331832945	0.521292366	0.376549826	0.13379448	0.814500784	0.076303027	2.214849379	0.04975422	0.235034888	0.230036018	0.936299848	0.632535392	0.213818949	1.885062995	0.490222309	0.298464395	0.068885471	0.316779655	0.122987845	0.35730902	0.669064378	0.324608079	0.231385968	0.281078461	0.545118456
E07000036	2011	0.459695051	0.560433953	0.590275542	0.322885709	0.160863635	0.173179311	0.584314322	1.772860961	0.295757214	0.378105778	0.243349964	0.296770178	0.349834522	0.807448594	0.781806251	0.232733165	0.847000493	0.01621262	0.097043272	0.896327066	0.933850935	0.794034175	1.164548393	0.312664227	0.493873009	0.364410989	0.117063043	0.775805592	0.068670701	2.190806739	0.049744469	0.223080618	0.213030037	0.895669284	0.649999107	0.199474383	1.636598442	0.464404856	0.277609208	0.089735969	0.295688297	0.113997131	0.307375854	0.629109337	0.332240121	0.206464506	0.234196871	0.507919384
E07000037	2011	0.479297427	0.569344487	0.604356614	0.32485812	0.169654613	0.177557233	0.604279208	1.751381688	0.297862295	0.385634938	0.242902934	0.300895321	0.362180059	0.817644586	0.788675267	0.235199143	0.859994224	0.018844416	0.099504388	0.903875926	0.945210618	0.799313145	1.169758188	0.313754114	0.49498415	0.368521392	0.122056777	0.786018035	0.070621551	2.186762286	0.049939151	0.225997876	0.214676571	0.916468304	0.645376194	0.201160814	1.724211199	0.464809998	0.281528775	0.089625656	0.298322824	0.114634174	0.317840076	0.635293634	0.329670112	0.21272279	0.249228633	0.524693962
E07000038	2011	0.483533611	0.568287284	0.614613734	0.330138284	0.176260793	0.185497356	0.617844531	1.778868316	0.300056721	0.385963221	0.254004075	0.307358206	0.363113134	0.818910314	0.78680139	0.238095433	0.855441918	0.017431248	0.103592744	0.922201111	0.956777769	0.832312458	1.190309383	0.326410336	0.507507444	0.366709298	0.124098681	0.805673316	0.074091505	2.210331616	0.049573397	0.233565289	0.225028785	0.930702572	0.654445573	0.21119831	1.669815216	0.480672309	0.292488913	0.088863318	0.312401284	0.123795991	0.336780636	0.665638436	0.320273531	0.226398783	0.247062152	0.51207875
E07000039	2011	0.463225859	0.568311886	0.593917158	0.323053892	0.161641957	0.173687638	0.590392603	1.738619817	0.297017027	0.379818262	0.238417943	0.295477556	0.35371465	0.808397791	0.783220916	0.2354649	0.853107103	0.016761495	0.099843304	0.895112768	0.943253514	0.777637714	1.161189655	0.306889104	0.484953969	0.366586601	0.118680111	0.770284286	0.068070741	2.175578091	0.050994135	0.225331279	0.208771301	0.903359531	0.651377907	0.197526015	1.697555323	0.457069064	0.272440188	0.092485156	0.288958768	0.109915544	0.300525742	0.624010158	0.337221351	0.20636111	0.23942534	0.528406594
E07000040	2011	0.522840477	0.568423603	0.635660715	0.344167681	0.188458019	0.204084267	0.641150251	1.662137849	0.306215025	0.410783271	0.269686964	0.326842201	0.369230782	0.778097201	0.810864162	0.241899814	0.886943249	0.025693071	0.096401834	0.962028391	0.975597451	0.881777841	1.216222313	0.348595161	0.536408327	0.374497988	0.128748699	0.843567118	0.075542854	2.268173451	0.04816393	0.238591166	0.24308273	0.931001812	0.645161338	0.222383853	1.767759265	0.515443827	0.305146107	0.07630468	0.329942788	0.129670762	0.369414197	0.704215177	0.319908516	0.237628728	0.272607096	0.520566014
E07000041	2011	0.433349078	0.539431389	0.560550284	0.30140541	0.152629607	0.158022456	0.560386172	1.789052903	0.282736601	0.358413719	0.224078203	0.271047441	0.337857856	0.799015512	0.75595414	0.220467093	0.798456809	0.014161347	0.097584925	0.843537934	0.889610731	0.730019594	1.105764091	0.282406468	0.464106366	0.340261318	0.110567955	0.709984811	0.066649592	2.051818983	0.048270767	0.214387535	0.196966516	0.864736916	0.621153398	0.189505188	1.483607779	0.426993545	0.263324608	0.090071508	0.271607984	0.104145632	0.284890082	0.605812776	0.320919579	0.196744895	0.220999433	0.478431163
E07000042	2011	0.483458404	0.560324869	0.603143372	0.327464224	0.169328338	0.184943795	0.601962551	1.700445147	0.300822011	0.393420543	0.246851721	0.309341178	0.352395199	0.784444321	0.781563232	0.2330251	0.856391622	0.022960405	0.096180188	0.911210855	0.943159774	0.810013379	1.169242443	0.321558295	0.496415546	0.367613427	0.122741673	0.792516428	0.070502285	2.179575803	0.04788488	0.228124807	0.219059927	0.908596544	0.641073008	0.205981476	1.680723145	0.477928683	0.285015058	0.083617019	0.303596493	0.117135718	0.321852569	0.654384434	0.326026399	0.216067186	0.254010638	0.514887409
E07000043	2011	0.489178416	0.558013552	0.607747215	0.326164943	0.173547672	0.187908241	0.608403926	1.691305478	0.301094527	0.393956636	0.252761711	0.309233907	0.354759108	0.776585853	0.785313952	0.235094666	0.856572974	0.024645998	0.095959858	0.920293878	0.946947358	0.826540589	1.180658672	0.326572769	0.504425024	0.366736311	0.122320621	0.792280201	0.071506188	2.17716428	0.047714637	0.228976443	0.224988448	0.90703415	0.636597292	0.209757895	1.687826489	0.483615317	0.290361092	0.08195045	0.310225086	0.118931194	0.333614308	0.658460188	0.324038626	0.219357295	0.254941151	0.513379294
E07000044	2011	0.524357697	0.58446466	0.643486911	0.335858452	0.189286659	0.200008812	0.647674095	1.675681956	0.309029824	0.410910506	0.265755754	0.326659011	0.380692825	0.789917462	0.822944182	0.242309917	0.904129026	0.028077766	0.098944783	0.960214571	0.981347908	0.868480897	1.22047909	0.34109815	0.533045698	0.385752992	0.131804493	0.834506174	0.0748655	2.276466789	0.048728812	0.239492675	0.238609587	0.955468178	0.653466503	0.218801389	1.836146233	0.514954425	0.303791054	0.073770439	0.324308715	0.124557793	0.364130067	0.683563028	0.33140995	0.237296515	0.274942427	0.53393317
E07000045	2011	0.499134877	0.568673524	0.619435885	0.334416587	0.179035444	0.192817464	0.620772346	1.736152051	0.305260166	0.400226742	0.259263378	0.316623198	0.360484813	0.795932558	0.806335291	0.240380164	0.872750631	0.021657986	0.0978326	0.942095801	0.963004116	0.849448265	1.201531726	0.335910415	0.514894496	0.37143404	0.123599833	0.815411071	0.072872943	2.239146308	0.049139623	0.233588498	0.232188261	0.928295777	0.653408323	0.214854941	1.721419778	0.496757763	0.295525421	0.079176433	0.31804079	0.123422504	0.34369128	0.677153447	0.324698021	0.225444011	0.260621467	0.518492424
E07000046	2011	0.487096925	0.561232636	0.614621347	0.335604097	0.173548391	0.19225765	0.607152455	1.783227453	0.3011093	0.397056918	0.265834676	0.315471594	0.351863846	0.783885925	0.79899534	0.239649357	0.866767793	0.020734638	0.095292185	0.937907973	0.949740335	0.856544856	1.207936343	0.343631754	0.515607581	0.372560467	0.122114379	0.815838282	0.071697598	2.244730968	0.048780274	0.228140829	0.235009987	0.910829645	0.651208933	0.212880012	1.679416122	0.502002756	0.296623779	0.08652111	0.324480574	0.1254492	0.338525865	0.68563481	0.322445469	0.22060368	0.255775427	0.505547516
E07000047	2011	0.501787838	0.576260247	0.622977196	0.334158649	0.176907364	0.195434614	0.622838971	1.759963626	0.30559718	0.400921074	0.262100489	0.324711484	0.362890304	0.795578725	0.817049494	0.242798968	0.882463294	0.018683163	0.097915835	0.949405748	0.966344294	0.855977283	1.209913369	0.339236183	0.522866808	0.37649237	0.124395019	0.833556806	0.073063419	2.2659622	0.049232812	0.237221042	0.237182523	0.936708082	0.661986525	0.214896796	1.747527013	0.512425737	0.297933203	0.076776013	0.319515202	0.1243332	0.346411921	0.690671171	0.327782665	0.22589854	0.257677829	0.514211902
E07000048	2011	0.526342415	0.566137423	0.628385927	0.348551238	0.18936417	0.204009125	0.638503413	1.653951893	0.303230814	0.409072147	0.267924279	0.324127929	0.36681425	0.77111175	0.810330596	0.24155315	0.881626704	0.024773394	0.096561432	0.960426657	0.974318982	0.877687159	1.211141891	0.347074979	0.538157675	0.368763136	0.128302214	0.838188224	0.074673341	2.257710712	0.047781022	0.240105343	0.243029082	0.923670955	0.640298258	0.222947918	1.760405917	0.511036027	0.303862969	0.081190329	0.3303172	0.130012404	0.371113019	0.710549007	0.316498801	0.238807206	0.272721872	0.521771886
E07000049	2011	0.52439588	0.571103281	0.63794102	0.340769087	0.190994467	0.205875468	0.64589179	1.644722885	0.302916061	0.407090705	0.266554094	0.325490405	0.371078725	0.778712368	0.815041733	0.245455233	0.884706933	0.023281555	0.097390383	0.962225391	0.982661068	0.882891635	1.216175018	0.347968663	0.534581658	0.373387982	0.12846398	0.850574465	0.075062357	2.259180063	0.047645547	0.241725784	0.241976567	0.940446315	0.644701124	0.223364849	1.813038112	0.51498867	0.304609838	0.079322118	0.332549174	0.128064069	0.370250631	0.713789493	0.318690948	0.239796678	0.270205627	0.526394492
E07000050	2011	0.507186846	0.566481868	0.627872161	0.3319058	0.182285407	0.190289698	0.631501097	1.679377297	0.299170604	0.398551599	0.25011718	0.311898964	0.369504324	0.781291376	0.794652245	0.236265918	0.867914603	0.029587947	0.09885381	0.923653242	0.964077044	0.823264016	1.181818015	0.325906686	0.511321565	0.371709467	0.128112959	0.804094214	0.075187283	2.174726324	0.048610561	0.234406644	0.223455604	0.931197963	0.631878952	0.212636115	1.752111154	0.484275838	0.293484531	0.08955637	0.311792015	0.120488337	0.346526097	0.662591606	0.321504498	0.228802216	0.270211732	0.529672084
E07000051	2011	0.495857428	0.557632538	0.619170329	0.326194243	0.182896735	0.192636364	0.628233042	1.646089122	0.295504927	0.391090607	0.257589492	0.308966211	0.36206606	0.770369871	0.789322829	0.236033705	0.855033255	0.023122659	0.097888027	0.928901197	0.950084326	0.839994756	1.187944492	0.333748397	0.516413807	0.36156658	0.124672971	0.797406799	0.07637267	2.171449649	0.047722673	0.233587475	0.229002434	0.921836438	0.634023658	0.218060828	1.687999519	0.486743213	0.297343824	0.079986369	0.316730416	0.123667498	0.351573098	0.672509669	0.312900836	0.2310006	0.260126509	0.509774809
E07000052	2011	0.519910077	0.568687899	0.636914685	0.332381251	0.193993218	0.201522399	0.648246807	1.609570386	0.298413919	0.400345955	0.263307876	0.320770129	0.373894157	0.769621296	0.798120241	0.239728501	0.873649328	0.028068094	0.098017081	0.942279363	0.965661784	0.868255447	1.197995496	0.339896029	0.526880872	0.369116629	0.131308623	0.823722029	0.07759364	2.207715286	0.048050226	0.238316792	0.238360841	0.931997768	0.627412152	0.22123902	1.803000115	0.498490076	0.305883986	0.072868826	0.325679581	0.127338217	0.374237945	0.682675059	0.31382539	0.23876022	0.275547057	0.52480239
E07000053	2011	0.459425736	0.545464648	0.589705812	0.317615043	0.169338158	0.180452022	0.595939433	1.733653674	0.291829555	0.375245369	0.249585054	0.297444737	0.346670738	0.786005741	0.760743805	0.226535328	0.823425566	0.017602184	0.097324121	0.895052266	0.919277745	0.817188758	1.156723093	0.317566537	0.489574365	0.350499463	0.117994113	0.761646553	0.07372293	2.120815969	0.046007285	0.224703524	0.221437316	0.899667106	0.635255766	0.209384651	1.527999273	0.462993097	0.286090079	0.08195306	0.300642023	0.119856225	0.326570611	0.651187047	0.308924684	0.219692355	0.243772698	0.48571716
E07000061	2011	0.489445009	0.570860445	0.612086464	0.338679638	0.17541917	0.185602859	0.615737302	1.818655032	0.303299308	0.394881261	0.254301049	0.305113232	0.361493929	0.820241361	0.810656601	0.240053789	0.866555858	0.018103835	0.101961086	0.935084141	0.962871953	0.828066947	1.203650384	0.325344841	0.515003142	0.367866132	0.120839807	0.784851346	0.073666947	2.237494882	0.049995301	0.23454681	0.225214914	0.92970607	0.660055537	0.214772746	1.643396126	0.480273995	0.292197027	0.095238386	0.3089203	0.118950244	0.330943768	0.665607711	0.330890369	0.221337816	0.249680051	0.513753861
E07000062	2011	0.452291107	0.558323516	0.589547202	0.331147874	0.164550951	0.173527361	0.587161214	1.85011359	0.297761851	0.381374974	0.243709514	0.29264303	0.347836122	0.834480368	0.771639627	0.229939933	0.839052112	0.016863098	0.102448248	0.893367686	0.940860376	0.79188342	1.169356226	0.313450515	0.48560904	0.358681269	0.118039838	0.75888879	0.072264209	2.168532206	0.048984366	0.223785573	0.214967525	0.913256923	0.65455709	0.202973233	1.529853566	0.450195537	0.282031946	0.099635453	0.295509672	0.117757222	0.305817165	0.634924173	0.325532128	0.20841068	0.23879142	0.506293056
E07000063	2011	0.510543293	0.583308158	0.633808981	0.337746217	0.185284488	0.193525495	0.641073711	1.7285654	0.306036756	0.399707831	0.258063662	0.314338983	0.375919054	0.815150099	0.81483217	0.244705122	0.882573537	0.020238521	0.101002393	0.951327912	0.979123484	0.849789695	1.216836055	0.33376317	0.525687849	0.37474699	0.127971019	0.81408047	0.075804698	2.255683656	0.050825086	0.240933048	0.231249929	0.945484193	0.657081164	0.218022221	1.791166163	0.494622104	0.299756989	0.087659653	0.316746816	0.122022307	0.353403001	0.669417164	0.32804999	0.231266483	0.260833975	0.532829456
E07000064	2011	0.51846815	0.573351349	0.641999436	0.348375614	0.19390228	0.205689016	0.646271146	1.709799058	0.308576776	0.409951671	0.279414384	0.330039918	0.370712404	0.799082922	0.815208345	0.244145725	0.889586429	0.021486475	0.098624724	0.972942767	0.982763042	0.911301539	1.23894383	0.358445297	0.546617485	0.377420381	0.126282392	0.849342016	0.077514827	2.303804334	0.048294101	0.241546162	0.250341813	0.940672382	0.651508645	0.228056105	1.72749932	0.519386932	0.317342112	0.078569754	0.339520123	0.135884904	0.381691383	0.721486641	0.315016648	0.239305021	0.268610178	0.516670834
E07000065	2011	0.519706842	0.587084058	0.641908554	0.344348319	0.188784178	0.198662737	0.646395564	1.684327464	0.309838986	0.409063357	0.262840799	0.323586148	0.378224023	0.807212739	0.824533783	0.247694186	0.898874442	0.023653776	0.100479535	0.958410554	0.991484778	0.866627024	1.225114558	0.340706493	0.531834049	0.383657466	0.131019434	0.842135258	0.075914316	2.271028913	0.050800549	0.241258849	0.235812444	0.950429519	0.653924581	0.218404592	1.853058881	0.502385618	0.303602192	0.083223475	0.325023358	0.125265611	0.359468451	0.682239533	0.332765847	0.233237792	0.27323987	0.54816274
E07000066	2011	0.457624635	0.5623596	0.59194723	0.322178838	0.167207671	0.171550764	0.596953366	1.699206095	0.290252145	0.3745023	0.234602148	0.286874935	0.357167256	0.810270781	0.770500447	0.233195712	0.832422874	0.016654854	0.101325209	0.875058071	0.938465653	0.770354561	1.142844822	0.300747806	0.483381697	0.35475702	0.118135901	0.752922468	0.07216863	2.104665793	0.050671453	0.225406964	0.206507775	0.903193836	0.631735219	0.199488946	1.643017108	0.44042595	0.277098214	0.09871143	0.286836839	0.111922083	0.310258105	0.603962837	0.325986073	0.20920318	0.237741173	0.523626312
E07000067	2011	0.485979853	0.577536341	0.612130808	0.324477028	0.174319961	0.17647354	0.619501907	1.707640772	0.301177647	0.386582771	0.237705415	0.299593062	0.374071189	0.817224737	0.801863324	0.239009331	0.86702838	0.019518013	0.101653336	0.905457478	0.959792953	0.787987157	1.168449244	0.305824675	0.495527235	0.370109216	0.123215521	0.779196361	0.071793898	2.178034867	0.050930302	0.231959132	0.210377299	0.934328685	0.645379333	0.20232528	1.790986926	0.463101229	0.280055656	0.095247856	0.292305499	0.109648159	0.316010033	0.630520771	0.336730785	0.215093737	0.249774244	0.539942331
E07000068	2011	0.512661026	0.603117729	0.642343597	0.327635699	0.192009824	0.189980246	0.653782121	1.620211469	0.294070276	0.39001837	0.240403254	0.30890448	0.391768663	0.809110096	0.809941297	0.247973479	0.894881772	0.021682462	0.104411219	0.914113845	0.973690245	0.803402228	1.170011744	0.307737012	0.51985376	0.374119942	0.134411589	0.811799102	0.074545904	2.220331823	0.053261002	0.242063304	0.219536411	0.943289456	0.630694069	0.206512763	2.069210928	0.471191337	0.285366863	0.078510488	0.299208673	0.111816322	0.348813624	0.640105647	0.333942766	0.228273894	0.26437107	0.572339168
E07000069	2011	0.499029924	0.572554541	0.624494103	0.328223499	0.183944261	0.191212863	0.634017868	1.691556378	0.300541294	0.393581797	0.253201807	0.314588011	0.373548228	0.79357751	0.798982063	0.239341649	0.870471326	0.02192675	0.100389794	0.921566853	0.959633406	0.835331364	1.184140536	0.326895531	0.514833563	0.368810717	0.126989115	0.811343209	0.07460707	2.201094173	0.049175674	0.233740975	0.227311579	0.932578535	0.638427827	0.211261159	1.781891204	0.484484644	0.294962669	0.076971466	0.310350434	0.122377611	0.34960654	0.665946839	0.32392367	0.228958189	0.263611561	0.531517815
E07000070	2011	0.481057598	0.581748218	0.612771463	0.324375777	0.175328385	0.178557548	0.617268975	1.675268755	0.296838399	0.387361448	0.239213855	0.299109479	0.370942268	0.809846033	0.789147226	0.238616044	0.866108556	0.019985773	0.103250293	0.897052643	0.957184608	0.78951072	1.164595997	0.306112104	0.500922265	0.368748311	0.125971778	0.786700618	0.073719481	2.164216152	0.051673166	0.231328488	0.213362342	0.926249529	0.63363194	0.20133477	1.808996458	0.458829794	0.282306638	0.089695527	0.297806401	0.112992926	0.323866368	0.630319186	0.336627025	0.216621143	0.250313065	0.546502902
E07000071	2011	0.457871021	0.558657086	0.592778014	0.304140455	0.176008467	0.171510358	0.616509079	1.628604384	0.282774131	0.362909608	0.226569377	0.276581915	0.365938236	0.801538385	0.74663857	0.22791814	0.808194666	0.018470117	0.10301287	0.852018358	0.927441984	0.750883643	1.117029127	0.289900381	0.477254181	0.339731489	0.123460823	0.725574175	0.077133231	2.005271567	0.049729959	0.227184518	0.201157647	0.916294025	0.60961556	0.201678957	1.584994417	0.42304385	0.278589589	0.094767902	0.281402482	0.110614846	0.323856824	0.598542544	0.313569799	0.218141008	0.243872527	0.521124901
E07000072	2011	0.480859653	0.579182628	0.615436449	0.32807158	0.181040051	0.181573382	0.624308153	1.675993354	0.292008205	0.383425688	0.243594516	0.299188026	0.371495168	0.815837985	0.784341468	0.239912159	0.855561948	0.018956786	0.104177796	0.895302845	0.960504057	0.803058561	1.166373128	0.311770633	0.504112555	0.362069841	0.125995995	0.781795456	0.07600809	2.145531924	0.051426807	0.232561382	0.216932121	0.923254225	0.63242514	0.206775217	1.739435964	0.452879144	0.289346584	0.088655496	0.299483755	0.118213667	0.333499098	0.635524974	0.325745174	0.221113372	0.25378113	0.542047298
E07000073	2011	0.435638552	0.548347839	0.570735868	0.316917146	0.154181095	0.16357552	0.566181584	1.709598269	0.290831186	0.374393291	0.231671472	0.278752639	0.340560661	0.808322306	0.750949931	0.225845849	0.815950466	0.01582152	0.099400547	0.863474004	0.924317514	0.753428267	1.134221823	0.296039652	0.470900403	0.350295585	0.11300027	0.730477784	0.069953783	2.073772755	0.049948493	0.220249438	0.199867319	0.883053433	0.633328235	0.197327866	1.480289278	0.432780401	0.271097007	0.105174102	0.281449975	0.10991971	0.288519622	0.591091019	0.328111438	0.201110762	0.224823886	0.50767905
E07000074	2011	0.493874347	0.589050263	0.630915489	0.335544321	0.182212493	0.190858622	0.631859174	1.711474395	0.302969292	0.396681588	0.258738385	0.315316154	0.375790907	0.825683689	0.80604199	0.247267272	0.881037857	0.017969592	0.108400686	0.931757676	0.973452835	0.845755572	1.206927206	0.329376055	0.5187651	0.377255288	0.128006067	0.839151357	0.075298156	2.255526977	0.052435888	0.238431546	0.229871015	0.944723609	0.653942058	0.211443605	1.870524593	0.489248308	0.29533331	0.080185867	0.319215815	0.123542585	0.3475825	0.667405793	0.331856596	0.227892572	0.255119541	0.54585323
E07000075	2011	0.506515168	0.584324968	0.632632443	0.331109654	0.183842794	0.190613661	0.639509489	1.680036038	0.300314429	0.396341525	0.249599245	0.312179602	0.377436542	0.804420486	0.809392827	0.245105641	0.880729559	0.023257515	0.101745374	0.92724254	0.976009497	0.825042566	1.192207376	0.323430808	0.516696753	0.375658787	0.128656498	0.814611769	0.074310933	2.211558917	0.051632467	0.236722361	0.223892416	0.942844242	0.640950403	0.210678609	1.882626216	0.481006375	0.291105577	0.089488902	0.30986966	0.117996611	0.345430664	0.658255415	0.331732073	0.224938703	0.263110145	0.551967001
E07000076	2011	0.508771195	0.563162791	0.626517142	0.34725706	0.185670027	0.198156673	0.626936875	1.733918961	0.303791577	0.403211925	0.268748666	0.321410879	0.362064677	0.792342792	0.804636813	0.238641043	0.876001716	0.022012968	0.096896119	0.948018311	0.962708954	0.87911902	1.20799291	0.34774389	0.530443945	0.371847427	0.124414464	0.834293235	0.074551332	2.273583262	0.048199417	0.233778764	0.240662732	0.925521902	0.644047761	0.218549445	1.718688249	0.505976343	0.305384099	0.084930245	0.328569457	0.130797825	0.364140507	0.700260164	0.31466475	0.230648377	0.262744183	0.509841352
E07000077	2011	0.494267294	0.579438655	0.616184072	0.323703788	0.17755603	0.182659648	0.621547134	1.631759634	0.303070233	0.392402673	0.240527766	0.306930785	0.371490255	0.80161012	0.796617269	0.240434503	0.875095692	0.022309086	0.09956272	0.911846965	0.967289116	0.806927585	1.174458367	0.312695134	0.50149652	0.374049682	0.127768304	0.795632212	0.07280276	2.166268274	0.052153425	0.232104867	0.216007982	0.924653628	0.635350918	0.203366701	1.843608837	0.467634442	0.284260996	0.081552601	0.300940004	0.114264275	0.328299037	0.632829287	0.336536707	0.217473709	0.260538815	0.558284025
E07000078	2011	0.456419463	0.558496748	0.585213771	0.314574948	0.168279734	0.167825155	0.594936068	1.705580456	0.281876385	0.368817265	0.228750113	0.284061737	0.357207331	0.801332985	0.755984502	0.226733216	0.82574121	0.018555735	0.102620641	0.852559627	0.918852092	0.753432148	1.121227262	0.290209111	0.477970759	0.347910249	0.119794185	0.733406794	0.072794777	2.07258535	0.049090441	0.221896696	0.203585548	0.892703172	0.613153412	0.19512142	1.633948113	0.428074813	0.275748297	0.087320105	0.283320533	0.109482962	0.308576753	0.614080258	0.321501779	0.209004676	0.242247505	0.514588604
E07000079	2011	0.505849795	0.57443269	0.625104599	0.335844518	0.17871037	0.193051089	0.625585362	1.745801351	0.304971172	0.401655134	0.259479157	0.316184895	0.365327274	0.799167327	0.804765048	0.241681237	0.878254703	0.021905178	0.09766277	0.947411495	0.967384231	0.850698281	1.214085057	0.337602767	0.524158247	0.377042762	0.127312664	0.819390561	0.073241849	2.242573574	0.049180654	0.237570301	0.232542537	0.929213954	0.652336801	0.215134324	1.739808797	0.500559215	0.297628008	0.079886106	0.320906953	0.123275082	0.343197849	0.682054655	0.326869238	0.226528017	0.261896449	0.525393081
E07000080	2011	0.510302274	0.574333179	0.626437317	0.3265549	0.179689612	0.188922582	0.628898137	1.708475043	0.304304795	0.399316655	0.248693023	0.318209631	0.374096257	0.786758536	0.809267592	0.237554627	0.88189918	0.027467736	0.098998854	0.929377774	0.96139027	0.819266425	1.18268118	0.322376694	0.512769487	0.376474345	0.127496307	0.813512014	0.07343247	2.211094278	0.049380889	0.232836385	0.223526559	0.9341578	0.640599413	0.20781388	1.826750265	0.497544527	0.290473969	0.0769847	0.308327487	0.117713234	0.339847097	0.656720365	0.329133833	0.226846736	0.267061563	0.52920207
E07000081	2011	0.419678447	0.533149893	0.558368003	0.3034293	0.156119304	0.159020628	0.566836961	1.703535772	0.279993648	0.350865124	0.223191496	0.263947465	0.336267091	0.80501201	0.715188433	0.220308906	0.768668188	0.014240993	0.102433677	0.832534099	0.900163157	0.723655333	1.096714129	0.283358468	0.454294864	0.33112402	0.113739504	0.697989282	0.073085697	1.968998849	0.047577072	0.218139685	0.192541378	0.881594339	0.616025266	0.196907398	1.374626163	0.406558887	0.267001516	0.106317011	0.273746277	0.109941238	0.288957629	0.577179717	0.305408795	0.20549807	0.221429864	0.490934792
E07000082	2011	0.499190497	0.571726983	0.62037062	0.32208714	0.178933686	0.185968111	0.626723905	1.651028862	0.298878293	0.393127141	0.245608432	0.309936595	0.371814382	0.787149225	0.796415187	0.237692258	0.872508933	0.024926948	0.099338614	0.915199795	0.956601378	0.813366568	1.17508138	0.317790914	0.504732846	0.370011009	0.12639149	0.795729239	0.073284779	2.181857336	0.050287668	0.231564368	0.220401098	0.935006263	0.636352924	0.207108534	1.804670466	0.476679054	0.287690198	0.076721567	0.303127137	0.115462733	0.333464692	0.646247479	0.328512795	0.221943387	0.26307033	0.537464346
E07000083	2011	0.486232472	0.57127194	0.613571833	0.322053692	0.172352234	0.183298107	0.613470111	1.702848144	0.300883924	0.390260869	0.249044605	0.306882924	0.363387001	0.78999221	0.80207308	0.238667958	0.864913017	0.019940749	0.097776112	0.921328581	0.95270818	0.813417011	1.183885532	0.319576569	0.504685086	0.369457919	0.122251018	0.785871378	0.07158054	2.195492915	0.050224936	0.231405266	0.221403198	0.915549166	0.648376022	0.208399323	1.730488533	0.482443997	0.285930826	0.082660649	0.301930857	0.114115669	0.325512551	0.640912532	0.332273152	0.217798473	0.250042061	0.520479043
E07000084	2011	0.484757335	0.592029832	0.620782882	0.326765925	0.178528769	0.175785691	0.630124661	1.703540439	0.294826941	0.382587905	0.233717439	0.293890038	0.38075812	0.830963693	0.787752415	0.239358244	0.864842232	0.019487427	0.105662366	0.887917633	0.964054391	0.774889549	1.15893535	0.299796786	0.497982411	0.366898011	0.127549359	0.777021128	0.074822329	2.143494493	0.052330662	0.233270754	0.207739956	0.939749099	0.634731807	0.201203084	1.829290651	0.444685131	0.281533348	0.099612769	0.289397169	0.110742522	0.323513041	0.625625018	0.335112647	0.215556182	0.254842368	0.557991642
E07000085	2011	0.51243741	0.596974212	0.642042926	0.332537997	0.186959533	0.192525575	0.650794777	1.690407372	0.304025254	0.399409109	0.249733564	0.313435227	0.383944	0.819847201	0.819860085	0.248149963	0.893584745	0.022194154	0.103127261	0.937722694	0.987733089	0.831172439	1.202774452	0.323289423	0.523363283	0.377724582	0.132137082	0.823010089	0.076028681	2.232360956	0.051993593	0.24232451	0.225864509	0.958492352	0.652103032	0.212778593	1.932419597	0.485345659	0.293463592	0.085387694	0.309635576	0.117852093	0.348713509	0.659414878	0.335241535	0.229277951	0.266856749	0.561577229
E07000086	2011	0.474731748	0.576929145	0.6107835	0.327263745	0.175999008	0.177492876	0.622723914	1.714126804	0.298515662	0.383030671	0.241260117	0.292541051	0.370669786	0.833077333	0.787674755	0.23840272	0.850107143	0.017763948	0.104224552	0.901956277	0.965597198	0.795998613	1.174952103	0.309590591	0.498657535	0.361719504	0.123901907	0.777834098	0.075818007	2.140594127	0.050961399	0.233234783	0.213193479	0.943247595	0.646119255	0.207461168	1.67491412	0.45492751	0.287624115	0.100150854	0.296150265	0.115862004	0.326504802	0.632455656	0.328278158	0.220428938	0.249110387	0.53688368
E07000087	2011	0.516992817	0.593352347	0.644076113	0.330437718	0.190090921	0.192085338	0.653960426	1.676055136	0.304397707	0.398688597	0.250791618	0.317530235	0.388070048	0.813074613	0.818484527	0.246001099	0.891196402	0.025580725	0.104487021	0.937902426	0.986925851	0.831331441	1.201949614	0.323227471	0.521708072	0.379742009	0.132677418	0.818469227	0.076931622	2.227969128	0.05190205	0.241631363	0.225181465	0.954314756	0.647356334	0.213967723	1.896716997	0.488355877	0.295810054	0.081755894	0.311643688	0.118784641	0.352434472	0.660682714	0.335165443	0.233207739	0.27125175	0.558481465
E07000088	2011	0.465802039	0.563578957	0.594607017	0.328015062	0.163393518	0.17338858	0.592451576	1.800388127	0.298893378	0.384168823	0.240494888	0.292164431	0.355522289	0.826649518	0.779439254	0.234305977	0.84242432	0.017401898	0.102839978	0.894087917	0.941554739	0.783716489	1.167763979	0.308285341	0.489910744	0.361900777	0.118013581	0.766237357	0.070871864	2.165402374	0.049810614	0.226468542	0.210189759	0.906574735	0.647961994	0.202771861	1.634803297	0.45524137	0.278381993	0.106735311	0.297875509	0.113771218	0.305748982	0.628859444	0.329472578	0.211528881	0.236440745	0.518791145
E07000089	2011	0.51441081	0.610171856	0.647770989	0.330099499	0.189488271	0.187801249	0.651389829	1.619646577	0.297758394	0.394005821	0.240778504	0.309117991	0.391162493	0.804780529	0.819375191	0.251026374	0.906897013	0.022873552	0.104507678	0.91759613	0.995428371	0.800758094	1.188776308	0.313257196	0.516203218	0.381851908	0.131320741	0.826425436	0.074826327	2.201343912	0.054713525	0.241573628	0.217647119	0.945298156	0.635702831	0.204687125	2.053164549	0.469556177	0.287147493	0.086309717	0.302831189	0.11242215	0.346446908	0.628118938	0.346000689	0.223261907	0.265592282	0.588402925
E07000090	2011	0.483810179	0.568449572	0.610832676	0.339265168	0.173472433	0.184814052	0.607827665	1.774529537	0.301508016	0.391474357	0.253928947	0.305975491	0.35875911	0.815576225	0.796831065	0.238164298	0.860893953	0.018781847	0.098862808	0.92426757	0.954220659	0.833792173	1.193003198	0.327639923	0.509943424	0.370184454	0.121298156	0.806748958	0.071757561	2.224173731	0.049401287	0.23023345	0.225690952	0.913137891	0.65234994	0.208941347	1.680605087	0.482769927	0.292045623	0.094696412	0.309745622	0.121125277	0.332303927	0.658866629	0.324738216	0.218456847	0.249934532	0.515202384
E07000091	2011	0.523783985	0.588356835	0.646448364	0.349377298	0.188862932	0.20136396	0.648844307	1.728628999	0.310026107	0.412409935	0.269120582	0.327603988	0.378361156	0.809632476	0.83354493	0.249104826	0.903917087	0.022457152	0.101094617	0.97263662	0.996633966	0.880916933	1.239662589	0.347420661	0.539804018	0.384196426	0.129659672	0.853879222	0.075776146	2.313815458	0.050860784	0.243685005	0.241417405	0.952331222	0.664148501	0.2224098	1.837150384	0.515707138	0.307093651	0.084706079	0.330190498	0.127309709	0.363400147	0.703689214	0.332679683	0.235948715	0.271050183	0.537847832
E07000092	2011	0.446060404	0.577916886	0.592551578	0.316574901	0.168231214	0.163031457	0.60467651	1.685307616	0.288290761	0.367760654	0.221077611	0.26790161	0.368126558	0.849996415	0.749200469	0.232245052	0.813170045	0.016131152	0.111292757	0.849250488	0.943815644	0.723867458	1.12445293	0.281191687	0.473763277	0.348943867	0.121786099	0.733078004	0.07584636	2.03454438	0.052793751	0.229013725	0.191437887	0.933220217	0.624556636	0.197812426	1.632432183	0.410565258	0.271905243	0.119482298	0.273099004	0.106786727	0.301691572	0.585788649	0.330295221	0.211360052	0.234604576	0.54612354
E07000093	2011	0.496316256	0.587401618	0.628474795	0.33010193	0.183351325	0.18563655	0.638875462	1.717879016	0.307133084	0.393333856	0.249391845	0.306415634	0.37845798	0.83197227	0.808479113	0.240597978	0.875451062	0.019667117	0.103465327	0.929212859	0.978259628	0.827383177	1.195655028	0.322205445	0.511981456	0.373272948	0.127623357	0.81044402	0.07576066	2.199947358	0.051487104	0.23745093	0.221804066	0.957263357	0.651546022	0.212090413	1.776219353	0.477931717	0.295150399	0.090203181	0.305308281	0.118982259	0.342041043	0.659858475	0.330639681	0.226726315	0.261611695	0.54349055
E07000094	2011	0.50696214	0.591117356	0.635571789	0.324901293	0.189462288	0.18848841	0.646285814	1.607053704	0.295117045	0.391624055	0.243163163	0.307300717	0.383482489	0.795513129	0.805780146	0.243981104	0.882458622	0.023402781	0.102804481	0.908739961	0.971939308	0.81017493	1.175611263	0.311712264	0.515156123	0.370320594	0.131664615	0.796894337	0.076987539	2.171824628	0.052738509	0.238581661	0.219437347	0.941093918	0.626705413	0.208711649	1.936733393	0.464408641	0.290463923	0.080475213	0.303853975	0.114395682	0.347543875	0.638368473	0.331708834	0.226334486	0.26605326	0.559309669
E07000095	2011	0.462928342	0.569726748	0.599670375	0.311590886	0.174801088	0.170703252	0.612976391	1.651115988	0.291584553	0.371742032	0.231966159	0.277556556	0.365695782	0.825369231	0.758471299	0.230912522	0.821059504	0.017435187	0.107471286	0.875573455	0.94201518	0.756573851	1.132028513	0.298072393	0.488378557	0.353014982	0.121203602	0.755349505	0.075056666	2.074182633	0.053091741	0.229860401	0.201522352	0.937219242	0.619791858	0.203927208	1.657157981	0.43641904	0.281579347	0.102309134	0.283748305	0.112071664	0.327860118	0.62062723	0.319839301	0.217064439	0.241384021	0.538363877
E07000096	2011	0.480594019	0.5757647	0.606499081	0.322188497	0.176283273	0.177049318	0.618994193	1.670127125	0.291782521	0.38174497	0.230877225	0.291648309	0.370892811	0.810043677	0.776313477	0.235083768	0.848618975	0.022027267	0.102561269	0.879933969	0.949185912	0.771721388	1.145799452	0.297860034	0.492640122	0.359440309	0.12635361	0.75768297	0.074635636	2.099549182	0.050900953	0.230953022	0.206600719	0.92785773	0.624078511	0.201547775	1.761694179	0.44067459	0.279952887	0.093034545	0.288479858	0.110527166	0.321838705	0.615964379	0.33097361	0.2156159	0.254207268	0.549251087
E07000098	2011	0.473095058	0.571308922	0.605292795	0.317040741	0.176944555	0.175574131	0.617538457	1.629431168	0.287136891	0.376294526	0.230485401	0.285061492	0.366016051	0.800565738	0.771682517	0.234787907	0.836905275	0.020047893	0.102820904	0.872430585	0.946946764	0.767466688	1.137244476	0.297344759	0.489592887	0.355679975	0.124220416	0.749271223	0.075117021	2.07161407	0.051844598	0.22971468	0.204989553	0.916809442	0.617592744	0.203030997	1.721942995	0.432892877	0.278683693	0.094943154	0.286691472	0.111065138	0.322736036	0.604423251	0.323744842	0.215718618	0.250209126	0.546562583
E07000099	2011	0.479321024	0.581041181	0.614585622	0.318829552	0.182108663	0.178075328	0.630413439	1.623165057	0.289981542	0.378606525	0.234496323	0.291786516	0.37774283	0.809136835	0.782418381	0.237417121	0.849961215	0.019006429	0.103752882	0.885555797	0.960172704	0.77892982	1.152415155	0.299743746	0.498245619	0.355762437	0.126029291	0.7629183	0.077099925	2.102998231	0.052449687	0.233560086	0.210260201	0.938617843	0.62785984	0.206499957	1.755557382	0.443304623	0.284373582	0.093022986	0.28928932	0.111257154	0.33086849	0.615280765	0.33003536	0.220967781	0.25060366	0.547203557
E07000102	2011	0.46559473	0.573322309	0.607263073	0.316646326	0.182486836	0.179227025	0.628175835	1.577926438	0.2839203	0.367713087	0.23328759	0.281898813	0.372024402	0.810998647	0.755403822	0.233315009	0.818651772	0.017822265	0.105873774	0.867047684	0.949095519	0.770287211	1.136755366	0.298169666	0.49062905	0.346203733	0.127096461	0.738720873	0.078767483	2.023240698	0.050758882	0.232139967	0.209589804	0.922297506	0.611438447	0.207636522	1.672601398	0.426070305	0.288298011	0.095629306	0.286182584	0.116497003	0.337155383	0.603358791	0.311453711	0.221831071	0.25010962	0.539773072
E07000103	2011	0.433982428	0.559687432	0.580542004	0.296580715	0.176733823	0.159920548	0.612409047	1.553635689	0.266815366	0.346246677	0.20909767	0.255311386	0.368868003	0.811399175	0.708580472	0.221839078	0.770899957	0.016160188	0.107033956	0.801327579	0.916402152	0.690660756	1.068720203	0.264177345	0.459174341	0.319156892	0.121174949	0.674487515	0.079221892	1.867408961	0.050658892	0.224005415	0.185426532	0.905114626	0.585256401	0.197039548	1.508937072	0.372429746	0.272631334	0.113017879	0.257181998	0.103253209	0.315710545	0.541796335	0.30607306	0.210587314	0.231662679	0.531018215
E07000105	2011	0.467601506	0.567366993	0.598947306	0.318482907	0.168205139	0.176165456	0.602410574	1.65961246	0.295302214	0.381958106	0.238903094	0.291892772	0.359251901	0.801444247	0.775930066	0.235590736	0.842150869	0.018216298	0.102078236	0.889259875	0.946313965	0.781831528	1.157396512	0.30692718	0.490946045	0.361833438	0.122542471	0.766549839	0.073110027	2.123112927	0.051244837	0.229050409	0.209903742	0.912868644	0.635174187	0.203226861	1.687562333	0.453020469	0.278605141	0.093161845	0.293836592	0.11351411	0.315306374	0.618654617	0.331292727	0.214324467	0.244352965	0.533625451
E07000106	2011	0.469574316	0.554225582	0.593435606	0.327621531	0.171354889	0.177847365	0.59613535	1.739531065	0.291530611	0.382968403	0.240911959	0.292949113	0.352551944	0.804791931	0.780649075	0.232652137	0.840446829	0.018812521	0.100128361	0.87945782	0.931069524	0.795239647	1.150166082	0.309976252	0.493821613	0.355428772	0.118958172	0.775532761	0.071546615	2.133959197	0.049426853	0.223186065	0.21607865	0.889299171	0.621437842	0.198212763	1.665043637	0.454190393	0.283973121	0.08734901	0.299772028	0.118111686	0.325204298	0.64430141	0.319412928	0.212340965	0.248120248	0.513861035
E07000107	2011	0.441722552	0.560219416	0.582950053	0.319714349	0.168988273	0.165005872	0.598482542	1.684914103	0.286518747	0.367556857	0.228421005	0.274752517	0.359161825	0.832323477	0.750966034	0.230726895	0.810461466	0.01636324	0.108180649	0.850920331	0.940838696	0.751665555	1.127272947	0.291224422	0.472303845	0.343931914	0.116943815	0.728088208	0.075562504	2.024612083	0.050847277	0.223279323	0.19910087	0.910414595	0.624517034	0.198415032	1.530493344	0.413819242	0.278903383	0.112109621	0.280190208	0.113787587	0.304479045	0.586467815	0.320389748	0.210779655	0.234714924	0.527128037
E07000108	2011	0.489365064	0.575511447	0.621083318	0.335017587	0.179006314	0.185562958	0.625594043	1.752218302	0.300649676	0.389255446	0.252353354	0.307268474	0.37068303	0.819288011	0.80083444	0.23957051	0.86836448	0.018604503	0.101796695	0.918651261	0.960039516	0.827815348	1.188032685	0.323811524	0.511650803	0.367995911	0.124082918	0.804555824	0.074426014	2.218708443	0.049781118	0.234125673	0.224240518	0.936079548	0.647883074	0.210463736	1.751955491	0.47791828	0.292756233	0.092397291	0.30745047	0.119594737	0.339013551	0.657589238	0.324888998	0.224085714	0.253634497	0.522549558
E07000109	2011	0.438291337	0.543759786	0.578586812	0.315329527	0.170616378	0.16790434	0.597392502	1.673350199	0.281289374	0.361392381	0.231055145	0.271764247	0.350244053	0.808810748	0.734616755	0.22667399	0.787821041	0.016750236	0.104837407	0.845061706	0.928278658	0.757883081	1.121147136	0.296286348	0.469261693	0.335730203	0.115796114	0.714854832	0.075932244	1.973712525	0.049046613	0.221720379	0.202742658	0.895936262	0.611348284	0.20218711	1.465988192	0.410221907	0.283449825	0.106826069	0.280300502	0.117052447	0.309872329	0.591928274	0.304514429	0.213688853	0.238682995	0.512174726
E07000110	2011	0.488224222	0.579268714	0.618401038	0.319815338	0.179911936	0.180748658	0.633542855	1.657501245	0.297839252	0.388237522	0.237848869	0.296245869	0.378182203	0.810353341	0.78555123	0.237338148	0.859685255	0.023406804	0.104238556	0.898835713	0.963910311	0.786487032	1.164819314	0.304841637	0.496936364	0.364532626	0.127915431	0.774435583	0.075895472	2.126448679	0.051427135	0.23388901	0.211448264	0.944444724	0.632908452	0.20634626	1.765536316	0.455097982	0.285211808	0.094797034	0.294119911	0.112770442	0.329320084	0.62343108	0.332199808	0.221997794	0.256960701	0.548806264
E07000111	2011	0.502230068	0.589048924	0.634410849	0.330886521	0.185888422	0.189587461	0.646039067	1.651106774	0.296213391	0.393252875	0.245776025	0.30588241	0.379670813	0.804362659	0.797412079	0.243192673	0.875212293	0.0220169	0.10312316	0.919350178	0.980200725	0.814799602	1.186433394	0.31698649	0.512594917	0.369779364	0.131390816	0.795102684	0.077082721	2.174657047	0.051821255	0.240283027	0.220197091	0.944453484	0.636966934	0.212734174	1.864762662	0.467389986	0.291528827	0.092601861	0.303697796	0.116583962	0.34657685	0.639060148	0.329394809	0.227660506	0.261797312	0.555854702
E07000112	2011	0.495093516	0.573665705	0.61730734	0.333397739	0.179547103	0.186289345	0.625981107	1.768409157	0.298991022	0.390859899	0.249204358	0.303529042	0.370439337	0.814355983	0.796686065	0.236979247	0.864301201	0.021068345	0.101835543	0.918392864	0.958319906	0.820041979	1.184082893	0.321792321	0.512144603	0.365797049	0.125155888	0.796298463	0.07479277	2.199777855	0.04947383	0.234853717	0.222722776	0.937571362	0.64331201	0.210468192	1.738029999	0.477899944	0.292008471	0.093674354	0.304878048	0.118620264	0.338705088	0.657321181	0.323223115	0.224517655	0.25678328	0.522272168
E07000113	2011	0.473655523	0.567610922	0.601416044	0.33495935	0.169306378	0.176624124	0.604524867	1.783837339	0.30402806	0.387878309	0.241588836	0.298476198	0.362764942	0.827745112	0.79668409	0.237023882	0.859962281	0.017876272	0.10106011	0.903338236	0.959505296	0.798343486	1.172663225	0.312710893	0.494019992	0.366689565	0.119926519	0.78733395	0.071232272	2.180462543	0.050725704	0.226340463	0.213423085	0.925767305	0.651062277	0.201828917	1.676390557	0.462853624	0.280571992	0.104023932	0.295227329	0.115142632	0.315611243	0.635260729	0.332763292	0.213226249	0.244318828	0.523342758
E07000114	2011	0.463510699	0.550463017	0.590827751	0.339653459	0.164126771	0.181065574	0.583042151	1.855467946	0.30108785	0.38959453	0.257609106	0.301213293	0.341162798	0.815169262	0.783469534	0.234512623	0.847802873	0.01743155	0.096334005	0.917280055	0.942602287	0.832282038	1.192683567	0.33082757	0.499588543	0.364853981	0.114848233	0.78167352	0.070833336	2.218675999	0.048843857	0.223734141	0.226633712	0.889553539	0.656903719	0.207879971	1.511404086	0.475260658	0.289287836	0.099663037	0.311482664	0.122715795	0.318988527	0.648406819	0.321072537	0.210737976	0.236409393	0.496375854
E07000115	2011	0.478334656	0.578680843	0.609686296	0.329437069	0.1733526	0.179316204	0.611752469	1.685981507	0.301367621	0.390512128	0.242049565	0.29875882	0.365688112	0.826891848	0.786746855	0.24203591	0.861446117	0.018874575	0.107301078	0.905237978	0.966496926	0.801707413	1.175807472	0.311991638	0.499193436	0.36991327	0.124975847	0.794865702	0.073171472	2.170178821	0.053106938	0.232060716	0.213865605	0.924886541	0.643119247	0.203860393	1.768828647	0.459206863	0.282411846	0.093891119	0.302633898	0.116740811	0.320119548	0.629830662	0.335891502	0.217279834	0.249667048	0.553491072
E07000116	2011	0.484175821	0.587816015	0.618805426	0.328971451	0.175933769	0.179588237	0.618503537	1.699897842	0.2953784	0.383952878	0.237357307	0.298975108	0.369915585	0.815291018	0.78955582	0.239564257	0.867844389	0.019026286	0.102707728	0.896596159	0.954841459	0.790390285	1.164714869	0.306669801	0.508461415	0.368507284	0.125999701	0.783769058	0.072643292	2.165684038	0.051949885	0.233071895	0.214137797	0.921481428	0.62549947	0.201079509	1.876884776	0.455749702	0.282616731	0.091697609	0.295228528	0.11207509	0.328343016	0.639091149	0.332093281	0.213854042	0.25221905	0.551440192
E07000117	2011	0.425972981	0.53177579	0.556813102	0.309154851	0.151442584	0.162436282	0.554277545	1.724337295	0.284666751	0.361690886	0.227511349	0.272499123	0.328592857	0.791595643	0.730718154	0.218608938	0.788814074	0.015078188	0.099450707	0.843431817	0.892900975	0.737566112	1.104768907	0.292097414	0.457823042	0.340199045	0.112444115	0.721226636	0.069677127	2.03058399	0.046566583	0.214596021	0.197303665	0.876796071	0.620757545	0.193107828	1.446143015	0.426347038	0.264453755	0.101812615	0.276428555	0.109769889	0.285463528	0.592065205	0.311712866	0.199197993	0.222461732	0.481304433
E07000118	2011	0.463355767	0.559001706	0.591761552	0.315488208	0.164837254	0.173361997	0.593086625	1.717175907	0.293264891	0.375546614	0.236642801	0.291652799	0.354212284	0.796468106	0.76829101	0.230572226	0.834947046	0.018290083	0.098201156	0.883107403	0.926682155	0.77802385	1.147064041	0.306088466	0.482464518	0.360236045	0.119397693	0.757507196	0.07034283	2.118357563	0.048571998	0.224143702	0.208663992	0.897693362	0.633542474	0.199003449	1.646919189	0.452241498	0.276469387	0.088773406	0.289565528	0.111512119	0.307155187	0.619138438	0.324637079	0.209330221	0.240414227	0.515382865
E07000119	2011	0.509127748	0.572553557	0.624051771	0.327941173	0.184080116	0.191476767	0.631565064	1.668500404	0.297914358	0.395026667	0.253623113	0.310548079	0.372977925	0.782237955	0.806359259	0.237721424	0.873682795	0.025177326	0.098136155	0.92973261	0.95238793	0.830065107	1.185931623	0.32486225	0.523982802	0.367170959	0.125977779	0.807656204	0.07459471	2.211999585	0.049127031	0.235345922	0.229169779	0.929016023	0.631848524	0.21225173	1.828703359	0.493148433	0.293408465	0.075821622	0.309973609	0.118669116	0.348942985	0.66224195	0.323846322	0.229219353	0.262264285	0.521323456
E07000120	2011	0.413991163	0.519419922	0.548211336	0.289361131	0.156197621	0.158863603	0.561667047	1.661453315	0.273897647	0.340351745	0.221435664	0.259034867	0.330163339	0.769073434	0.710402327	0.214764234	0.753568099	0.014444457	0.095230421	0.816833065	0.872570388	0.719232079	1.073623291	0.281384756	0.446925799	0.322043091	0.110237516	0.673038064	0.072221345	1.910420254	0.045960853	0.211749996	0.192883751	0.852013511	0.59573909	0.193974941	1.376409062	0.403934383	0.264037573	0.097390786	0.267566937	0.107080566	0.291975143	0.573043352	0.294965265	0.201338401	0.221143887	0.472969354
E07000121	2011	0.454805581	0.544699644	0.581860257	0.324677145	0.164689754	0.173227676	0.581351043	1.761804811	0.288125813	0.37483685	0.23864968	0.288611667	0.342850276	0.801830581	0.767701695	0.228269817	0.824292918	0.017480453	0.098517646	0.873181368	0.91954792	0.785243694	1.141378893	0.308263534	0.482042849	0.351514945	0.115149779	0.760276583	0.070140087	2.115604807	0.048068725	0.219514207	0.212172757	0.881639539	0.626706234	0.197618441	1.58637514	0.447450567	0.277683487	0.09464804	0.294230306	0.11520278	0.311218912	0.631009964	0.31592641	0.206737854	0.23744562	0.497216462
E07000122	2011	0.414676392	0.514900515	0.548521701	0.30483057	0.160726372	0.160352365	0.567076132	1.693935383	0.271851661	0.346493755	0.223073494	0.258360465	0.328789222	0.778963543	0.694615576	0.213870691	0.74934863	0.015517582	0.099359181	0.811410741	0.87918433	0.724081543	1.073756496	0.283666988	0.447042399	0.316955774	0.111168562	0.676963318	0.073396837	1.891762327	0.045163322	0.211340478	0.195563172	0.863521317	0.590425299	0.195377396	1.341944755	0.394298034	0.268264168	0.109905678	0.268670835	0.111844538	0.295852478	0.570600513	0.288110726	0.204346084	0.22397632	0.473904172
E07000123	2011	0.385603368	0.497209126	0.529357836	0.274542302	0.158211872	0.148757027	0.558603477	1.595649051	0.255290518	0.318289785	0.205555891	0.235650984	0.323980163	0.763386765	0.650071364	0.201046692	0.69400429	0.013873439	0.097320079	0.7585709	0.849590955	0.667986744	1.017510108	0.260763731	0.426213852	0.293137509	0.109863221	0.612370173	0.078142137	1.718805701	0.043481928	0.206827804	0.179225021	0.849727557	0.560421864	0.191838413	1.165828664	0.354811938	0.262363522	0.104280302	0.254323072	0.107107725	0.289154778	0.531083428	0.271038469	0.204057743	0.218496822	0.454663644
E07000124	2011	0.500397641	0.56885633	0.618002316	0.316125257	0.180530937	0.187412454	0.631370099	1.576231875	0.298833686	0.389642114	0.239889715	0.305347303	0.37587436	0.781646125	0.795350827	0.239580089	0.864210288	0.028364246	0.09925358	0.906621993	0.950246856	0.799054184	1.159150316	0.311249492	0.50094416	0.366110307	0.127143908	0.785788937	0.072599348	2.156466659	0.050156751	0.231177799	0.218223732	0.932257941	0.624980972	0.204348912	1.861029647	0.475605009	0.283139257	0.0709689	0.298723455	0.112823047	0.337394856	0.63569685	0.325802987	0.223403646	0.264398983	0.545854655
E07000125	2011	0.434832647	0.542390602	0.568262123	0.311344875	0.15541436	0.166119211	0.565395016	1.763577585	0.285729317	0.362574717	0.23272021	0.282183884	0.338071308	0.795804953	0.747337104	0.224557405	0.80730008	0.014817348	0.095854528	0.854315223	0.903278422	0.759552516	1.126036337	0.298204686	0.470133989	0.348582067	0.112537061	0.733387187	0.068470572	2.068884968	0.047958662	0.216600061	0.204521643	0.871332916	0.627391175	0.194015422	1.540525368	0.437994137	0.269534194	0.08895203	0.282098114	0.109858829	0.294884309	0.597667097	0.317451967	0.199195911	0.225457532	0.493379928
E07000126	2011	0.46134177	0.553949503	0.588618558	0.310598358	0.164676251	0.172510455	0.592215319	1.672867812	0.291480332	0.373416274	0.235236546	0.289451374	0.353052616	0.788049175	0.763612579	0.229114203	0.825801616	0.018358826	0.098110415	0.878775062	0.922738727	0.772289028	1.137495805	0.302419689	0.480295871	0.355016778	0.119232792	0.750975108	0.070830041	2.092963226	0.048608097	0.222907792	0.207437205	0.896168687	0.628794017	0.200041803	1.614909131	0.450063937	0.275569596	0.08593822	0.287517847	0.111158834	0.309643669	0.615882108	0.321001392	0.211493775	0.24037644	0.509941802
E07000127	2011	0.475218792	0.555000095	0.594228751	0.31741741	0.167683875	0.176442222	0.593509137	1.690435866	0.295853291	0.379751702	0.240109033	0.298836954	0.354325492	0.788394632	0.781660511	0.231404095	0.844395747	0.018833794	0.096899677	0.891737506	0.929704924	0.790028883	1.147491369	0.310394062	0.486281183	0.362215635	0.120122114	0.779094984	0.06896494	2.15205686	0.049375661	0.223705434	0.211565309	0.894698851	0.63254058	0.197398102	1.689147744	0.464364969	0.277179684	0.082417565	0.294461805	0.112987081	0.316644022	0.626229744	0.323347616	0.210209826	0.245490734	0.510681761
E07000128	2011	0.496246724	0.556270788	0.610960436	0.335699498	0.176081171	0.191868017	0.611179624	1.719681263	0.298666567	0.395534818	0.257369519	0.314604152	0.355012339	0.780565938	0.794207475	0.23663189	0.859820932	0.021786244	0.09700268	0.926706532	0.950929198	0.844988114	1.184739869	0.334341365	0.514625545	0.366965103	0.122633919	0.813805662	0.07214743	2.212529942	0.048230328	0.229792612	0.230168206	0.906979301	0.639381657	0.211788856	1.685216555	0.49272679	0.292926168	0.081427684	0.316352049	0.123765351	0.34181732	0.676103492	0.319314281	0.222927839	0.257120351	0.508264234
E07000129	2011	0.471742595	0.561848185	0.602396978	0.309819373	0.175733458	0.177026301	0.615824609	1.612031046	0.288038019	0.372711501	0.236121001	0.290127135	0.36454439	0.782095339	0.764927068	0.230839394	0.828181131	0.020225261	0.099966485	0.882933783	0.939395224	0.777988667	1.142439941	0.30417742	0.48654826	0.354188143	0.124123109	0.751110569	0.074514358	2.073406693	0.05009019	0.229114583	0.208986036	0.908176988	0.619945691	0.205287546	1.674615983	0.445863405	0.281840375	0.087212152	0.288777084	0.112782352	0.326587196	0.610419237	0.318814976	0.218097364	0.250551367	0.528598371
E07000130	2011	0.443739427	0.54135233	0.579608953	0.300888045	0.174410514	0.169277053	0.606318596	1.651900311	0.275798121	0.35531303	0.226375372	0.270331322	0.354878391	0.796554166	0.72525781	0.222403995	0.781337355	0.017591575	0.104169711	0.837409848	0.912947953	0.747016265	1.101898048	0.289004871	0.466954606	0.330945716	0.121234691	0.714826006	0.076719905	1.950866519	0.04748404	0.222313979	0.199808133	0.902627691	0.601931184	0.201075297	1.47700891	0.413228255	0.278129947	0.094238248	0.280598864	0.114171518	0.319370822	0.60106483	0.298317695	0.218598355	0.24156064	0.50298627
E07000131	2011	0.493880502	0.576007632	0.615101367	0.319486912	0.178941334	0.185042961	0.625446031	1.616275167	0.300123904	0.389013489	0.240940394	0.305575285	0.3686227	0.790606157	0.793856371	0.237088235	0.86637157	0.024220868	0.099567626	0.908808783	0.959854979	0.805972225	1.165347773	0.315498454	0.506162284	0.370955722	0.126558593	0.783043673	0.07372143	2.146667906	0.052598798	0.231367037	0.217008548	0.929995251	0.625071964	0.205417678	1.831995103	0.466368525	0.285658644	0.079090952	0.30028425	0.115400916	0.335745583	0.645453136	0.329143327	0.219451094	0.263854045	0.552325431
E07000132	2011	0.469048786	0.563662015	0.600640688	0.3250746	0.168464542	0.178496224	0.600114255	1.754868756	0.29852858	0.381173451	0.247946812	0.301601363	0.356501092	0.808336051	0.779573458	0.233648592	0.848118145	0.017218092	0.098789772	0.902981359	0.943930166	0.814103169	1.170809959	0.317629059	0.49476225	0.36405863	0.119988349	0.785768358	0.071366941	2.171300931	0.049258493	0.226104138	0.218505418	0.903831456	0.645077939	0.203672169	1.634898048	0.468543943	0.285563047	0.084770918	0.301798422	0.118272941	0.321274713	0.64288876	0.323532717	0.214695453	0.241728459	0.509690327
E07000133	2011	0.478145778	0.55915092	0.603065588	0.314678015	0.169598321	0.180438713	0.604178775	1.709102201	0.293684827	0.380992031	0.241875517	0.301931486	0.355945812	0.783711036	0.79141116	0.236671331	0.84567292	0.021091738	0.098626554	0.903393633	0.944511558	0.797525826	1.169103994	0.315921352	0.489300186	0.363783374	0.121170491	0.767449535	0.070192424	2.155150498	0.049215428	0.228616054	0.212141081	0.913291201	0.641046676	0.205073846	1.705727209	0.467886461	0.282263025	0.082570749	0.297392235	0.113726637	0.315820061	0.630090962	0.328974474	0.212203652	0.250099227	0.522994577
E07000134	2011	0.470399597	0.563919001	0.598586885	0.321437898	0.167394828	0.175150834	0.599334883	1.728260789	0.293982959	0.379377863	0.239875346	0.297259767	0.35796942	0.800958076	0.782708449	0.232910054	0.845374977	0.017698847	0.098780602	0.895799993	0.939120445	0.787559018	1.158786018	0.310686712	0.490551951	0.363247641	0.119924564	0.768193721	0.070862078	2.150263237	0.050002863	0.226268987	0.212036752	0.906088533	0.641838626	0.201837315	1.685437653	0.459499295	0.278502777	0.090515731	0.292911468	0.112966705	0.311365163	0.632649793	0.32770554	0.211525243	0.243506149	0.519058214
E07000135	2011	0.439279574	0.538845491	0.590877038	0.283932113	0.194382476	0.175511291	0.651607432	1.488029461	0.267633986	0.341597963	0.223352096	0.253487048	0.371328164	0.786072625	0.688581398	0.216611073	0.736964813	0.017929575	0.113446972	0.823504799	0.927899349	0.755299893	1.091128134	0.289806768	0.469562538	0.309683653	0.131349722	0.678655213	0.089454542	1.79520451	0.047183395	0.232168171	0.198730511	0.947917177	0.581364542	0.218026308	1.326898385	0.386890481	0.292808347	0.105139125	0.284727386	0.120980099	0.347778184	0.575257929	0.271869616	0.241527432	0.253758463	0.500627052
E07000136	2011	0.449543299	0.543351146	0.58040035	0.330525066	0.160230803	0.176587291	0.577367579	1.799275362	0.291591334	0.379748817	0.246666571	0.292689133	0.337889824	0.79542041	0.760393579	0.228732372	0.82885216	0.016396348	0.097690418	0.887805491	0.924137476	0.803368525	1.161487998	0.317852448	0.484077391	0.354813939	0.113496842	0.763042606	0.070049846	2.143648946	0.048409985	0.219597129	0.215812678	0.877227084	0.64133576	0.203308076	1.509788836	0.458463464	0.281541391	0.101182463	0.303191459	0.119051518	0.308465534	0.642244585	0.316639877	0.20804217	0.235522827	0.493126995
E07000137	2011	0.506102135	0.565470851	0.627283636	0.331659877	0.181403356	0.197283577	0.627468342	1.72103117	0.302385015	0.398280844	0.265474486	0.324626674	0.363748999	0.772935977	0.799415214	0.239689934	0.873375014	0.023010686	0.096049036	0.943156429	0.95272085	0.862350991	1.20252225	0.343128417	0.521798339	0.373530204	0.125281984	0.828444691	0.073143866	2.261434417	0.04741621	0.234224663	0.237707394	0.921464825	0.646738223	0.216545162	1.756056626	0.509990964	0.300150288	0.072901554	0.322909022	0.12600771	0.356887381	0.68802778	0.319181181	0.229869309	0.26140038	0.504786088
E07000138	2011	0.406096647	0.526006744	0.542830193	0.310235598	0.147203678	0.152884025	0.53992214	1.862451192	0.277484315	0.349116996	0.223885965	0.260211047	0.323945092	0.817628662	0.72183117	0.216446638	0.770689712	0.013992747	0.105670821	0.817585129	0.878989987	0.721431217	1.096561066	0.281917372	0.449142041	0.332000853	0.106183693	0.695948339	0.069864141	1.998833766	0.047461436	0.209210334	0.19490118	0.850842689	0.617545567	0.187085871	1.327545469	0.407854855	0.263602772	0.108419799	0.272131655	0.110651156	0.275927897	0.58923154	0.307207348	0.193461355	0.21080062	0.469985073
E07000139	2011	0.48594727	0.56726642	0.610619857	0.32943348	0.171770719	0.186808145	0.610508511	1.725252831	0.302589324	0.393258431	0.252406685	0.312045301	0.359965265	0.799904844	0.791956878	0.237160343	0.86577585	0.020651617	0.098532037	0.923687155	0.952076684	0.829864734	1.189148745	0.327516271	0.504469624	0.370579951	0.12179605	0.803668731	0.071386561	2.214263684	0.050084386	0.229356722	0.225079301	0.913044745	0.650614862	0.208255736	1.711855493	0.483472413	0.287323582	0.082470723	0.310061284	0.120153834	0.329171589	0.665639202	0.330382265	0.219284889	0.253079632	0.525085195
E07000140	2011	0.487053332	0.558417738	0.60695096	0.326666192	0.174491682	0.184294029	0.611596978	1.703640148	0.297024053	0.385428209	0.249424614	0.310009914	0.359182849	0.780874422	0.776377743	0.23240545	0.847326969	0.022298899	0.097172242	0.909430598	0.941620788	0.818972386	1.168775757	0.322428441	0.500375801	0.364628272	0.12241148	0.78671407	0.071895836	2.179189003	0.048053751	0.229935513	0.220780477	0.903682341	0.637967887	0.2095648	1.67200124	0.476048198	0.288461159	0.082876751	0.30671991	0.11876311	0.332628183	0.654611685	0.319909449	0.221393825	0.252572072	0.50854036
E07000141	2011	0.483365089	0.571570539	0.610192331	0.322113246	0.172109136	0.182062459	0.613773361	1.72023473	0.300084001	0.3850659	0.245301821	0.303048025	0.362779389	0.803044897	0.79247375	0.237537921	0.858023298	0.019310718	0.099636869	0.915378832	0.950602202	0.807851613	1.17853763	0.318420163	0.502209701	0.367255611	0.120852317	0.786681432	0.071652198	2.18251453	0.050034769	0.231851238	0.217464932	0.928413242	0.648089416	0.207006622	1.7229166	0.476056376	0.285435952	0.087915153	0.301002635	0.114699875	0.326225599	0.649194578	0.328717957	0.21739857	0.248450415	0.523762207
E07000142	2011	0.48820646	0.569456631	0.613180369	0.32164639	0.171704037	0.185969803	0.612947149	1.70702584	0.301788587	0.389582459	0.25243998	0.31380599	0.363354518	0.788149506	0.797993737	0.238035495	0.863804417	0.020599333	0.097299244	0.921866931	0.946057227	0.825377465	1.184484048	0.326980385	0.509174755	0.37220549	0.124457879	0.805614275	0.070906692	2.214175293	0.048929262	0.231324585	0.22428059	0.919783966	0.646474577	0.207371393	1.73003145	0.49110984	0.289860392	0.072432836	0.307926479	0.118191618	0.333494058	0.651099739	0.330061216	0.219672432	0.251439689	0.514652897
E07000143	2011	0.48569903	0.560635771	0.605787504	0.336526919	0.168615034	0.18417755	0.601284757	1.787315391	0.301135191	0.393636697	0.255007152	0.306535408	0.353519392	0.801719606	0.796062689	0.238182664	0.860261728	0.018956769	0.096535982	0.92583936	0.950466006	0.827022917	1.198181049	0.331463516	0.505691305	0.372075264	0.119209519	0.806645842	0.069425639	2.225443131	0.04921941	0.230887583	0.224139484	0.903741639	0.654130575	0.208375433	1.639435652	0.489584006	0.290273755	0.096581966	0.312766841	0.119445212	0.325919995	0.663970276	0.326384405	0.215102604	0.24721472	0.507649445
E07000144	2011	0.502731277	0.584154277	0.634522801	0.337055953	0.182192478	0.192799193	0.63892837	1.725273552	0.305659903	0.39869251	0.259396046	0.317042819	0.374101601	0.816041736	0.816126182	0.245286485	0.879971775	0.018831952	0.102262361	0.94879968	0.985563135	0.852540568	1.220685834	0.336015906	0.523290213	0.377467385	0.12781016	0.829300044	0.075692167	2.247478501	0.050050231	0.241961867	0.231459578	0.954606221	0.661273575	0.218388701	1.758506667	0.49826782	0.299936859	0.088413584	0.319709832	0.124035296	0.349941399	0.675721237	0.330928637	0.231869156	0.259897506	0.532025433
E07000145	2011	0.455211353	0.542771839	0.586898243	0.315051128	0.163692548	0.177818098	0.584539652	1.740025829	0.292239434	0.378016982	0.247349949	0.295857599	0.34159771	0.781005648	0.756531691	0.227845915	0.820494459	0.018091336	0.098494482	0.889937403	0.922480651	0.798646593	1.159684203	0.317657385	0.48920977	0.353704751	0.117982009	0.756787159	0.07391519	2.124616617	0.048147384	0.224951962	0.216256812	0.900626457	0.635942883	0.20764608	1.513963943	0.463095343	0.283734757	0.090654455	0.30125793	0.119000335	0.316681374	0.629911954	0.316980251	0.216014326	0.236672978	0.490341486
E07000146	2011	0.494457887	0.565282896	0.619367407	0.334159154	0.174815926	0.188859692	0.619866133	1.767317112	0.302064889	0.393785566	0.259593706	0.30917535	0.363117534	0.799928964	0.802515151	0.239353378	0.864707501	0.020201435	0.09893577	0.936525344	0.959831167	0.837571852	1.203810738	0.334306165	0.513680156	0.370935654	0.122550064	0.811175288	0.072881183	2.224296969	0.04854949	0.23398357	0.229925904	0.92207473	0.654117929	0.214516738	1.656240765	0.496587452	0.294252208	0.094028737	0.312597448	0.121706759	0.339134036	0.683656842	0.324059549	0.224665592	0.25507031	0.510285643
E07000147	2011	0.527468201	0.574875243	0.644058053	0.347211319	0.189772334	0.208352151	0.647148635	1.749109476	0.308340031	0.414751681	0.276827344	0.336734948	0.370756303	0.780110116	0.826052214	0.245846504	0.898383698	0.024084101	0.097919442	0.974934523	0.981613639	0.897405624	1.235595068	0.357416694	0.545063547	0.378929524	0.128225444	0.861832794	0.076296488	2.320858872	0.047564285	0.241146404	0.248966366	0.948728617	0.659013586	0.226785163	1.78947857	0.530814186	0.310810697	0.074923609	0.336902737	0.131953374	0.374860019	0.724393305	0.321331102	0.240156464	0.272899313	0.511187314
E07000148	2011	0.419135563	0.532842767	0.551128056	0.301708147	0.152530727	0.154052098	0.555172477	1.793672423	0.274187418	0.351362398	0.220541596	0.264431282	0.335205633	0.797325988	0.726612226	0.215787052	0.787062503	0.015380529	0.100075344	0.81482275	0.875954016	0.714500581	1.089042154	0.276465711	0.455568737	0.333358802	0.110206304	0.685329712	0.070279091	2.011194148	0.047369	0.209871175	0.193370848	0.852064511	0.606612134	0.187709304	1.428956935	0.404800795	0.264164144	0.094330914	0.270281294	0.105380031	0.283398443	0.591087346	0.316153427	0.193909276	0.219606617	0.47877722
E07000149	2011	0.502744157	0.579932965	0.630664037	0.339073605	0.182026661	0.190924144	0.633760188	1.715380161	0.304633655	0.399027131	0.257244465	0.315271071	0.371983966	0.811043739	0.804930643	0.24329704	0.880292197	0.020421663	0.100648432	0.940296663	0.977673033	0.84562482	1.207138603	0.332684575	0.516807788	0.376107059	0.127505535	0.821518145	0.074949505	2.236171542	0.050375268	0.238124339	0.229075265	0.938712313	0.654363741	0.214737667	1.767488813	0.490180299	0.29790121	0.091167317	0.316598358	0.122992955	0.346911171	0.671396009	0.328203095	0.228112898	0.261416003	0.533629293
E07000150	2011	0.430590936	0.541218268	0.55957748	0.309282227	0.147317995	0.158575117	0.557369571	1.785473059	0.287185483	0.359712479	0.225071163	0.273355618	0.333778987	0.797534847	0.746662853	0.224413169	0.803421123	0.014343065	0.096836502	0.855000388	0.903887362	0.726325826	1.118684596	0.290425091	0.457798561	0.349025491	0.110018522	0.71164519	0.066040721	2.063675965	0.048923512	0.217658829	0.193124301	0.876754344	0.641002335	0.193003733	1.4714479	0.432356395	0.259905234	0.105698141	0.276094643	0.10262492	0.275685819	0.588555901	0.328819919	0.193108927	0.21934219	0.491429917
E07000151	2011	0.478240419	0.572763973	0.6099419	0.324532304	0.175064161	0.181512717	0.613396573	1.706621208	0.294031535	0.380462229	0.242054454	0.302624804	0.364162551	0.806329319	0.783624978	0.238530079	0.857316238	0.017808846	0.100240641	0.89569191	0.947006957	0.801864391	1.164392587	0.31201853	0.496421296	0.364566776	0.12342466	0.79580826	0.071738724	2.165851478	0.050243943	0.229738945	0.216694772	0.912618101	0.637375139	0.202086581	1.801860958	0.464015855	0.282649902	0.082859788	0.298432274	0.115937764	0.327284035	0.64019559	0.327469342	0.216645268	0.249155708	0.534482856
E07000152	2011	0.480688414	0.572526985	0.609731203	0.319767364	0.171984817	0.177425276	0.615294334	1.669171701	0.297524746	0.3845821	0.236556399	0.297122158	0.370381508	0.799548389	0.78619463	0.233194265	0.855999333	0.020676192	0.09982429	0.898281925	0.951628331	0.78028937	1.156309525	0.305724739	0.490072282	0.366362118	0.123714787	0.771980158	0.07108935	2.142156889	0.049909543	0.230306274	0.210329474	0.918752698	0.633150885	0.202037305	1.771485034	0.462328848	0.278483421	0.095472228	0.28871885	0.110100417	0.318986292	0.620087888	0.329151332	0.215147112	0.247614548	0.531562723
E07000153	2011	0.459283863	0.560572638	0.587779094	0.316436415	0.16159673	0.168396521	0.587809589	1.708686939	0.292118759	0.373413378	0.233033724	0.288597074	0.355835492	0.798093585	0.770303315	0.23008678	0.835815844	0.016788582	0.097661998	0.877910465	0.927589108	0.759840223	1.14123113	0.299205733	0.480215238	0.359565037	0.117784832	0.748566008	0.068895029	2.122828472	0.049794055	0.224865978	0.204289558	0.894104366	0.634824634	0.196435066	1.655140216	0.449625501	0.27149873	0.095376219	0.281635528	0.107239074	0.300893272	0.603470367	0.329582874	0.205248592	0.234539861	0.51436871
E07000154	2011	0.421477947	0.537852672	0.558344785	0.299759618	0.157553268	0.155570427	0.569849104	1.671273932	0.275094576	0.350072137	0.215840317	0.258401531	0.341549883	0.798385993	0.708241598	0.21744734	0.76978571	0.015663332	0.103076403	0.813808491	0.890751763	0.700204312	1.076714088	0.274015635	0.450550987	0.329958204	0.115219837	0.685846854	0.073652441	1.934213897	0.048328696	0.215579196	0.186858546	0.883497658	0.600257921	0.192386887	1.417916169	0.395459723	0.263462511	0.109444589	0.264791759	0.105988414	0.287741119	0.571582832	0.30660201	0.203335841	0.224179646	0.498636621
E07000155	2011	0.485909548	0.580234317	0.614565803	0.317868017	0.175512026	0.182573151	0.620499049	1.638450015	0.297978334	0.38726524	0.240906431	0.306870569	0.369840594	0.792010876	0.793095603	0.240338726	0.871085577	0.021786644	0.099762089	0.906258112	0.959784772	0.799511716	1.170312642	0.312234295	0.499289602	0.370537037	0.12548002	0.786881035	0.07266903	2.164621119	0.052288424	0.231609089	0.215370938	0.927835755	0.638095335	0.203144818	1.850647617	0.46474607	0.282243873	0.07692797	0.298448634	0.111996028	0.32487403	0.632978845	0.336675539	0.215599271	0.256363618	0.552100881
E07000156	2011	0.45446973	0.553827646	0.584716072	0.311528513	0.165097959	0.169821534	0.594255422	1.672422863	0.289467243	0.371566404	0.230869507	0.282701441	0.354143298	0.79829269	0.740848435	0.227601691	0.812777858	0.01942536	0.103509629	0.861493322	0.927260919	0.754853667	1.124899088	0.295419522	0.475012214	0.35152091	0.12293057	0.741674105	0.07424514	2.050326721	0.049785251	0.225858906	0.201689024	0.915486216	0.620777572	0.200442445	1.5606565	0.438556426	0.273828415	0.098580171	0.283025507	0.111998345	0.308520184	0.600600525	0.317138188	0.214078455	0.237242093	0.514398255
E07000163	2011	0.482320118	0.555782091	0.605193594	0.322376505	0.172020256	0.187186989	0.604266683	1.692755878	0.296193472	0.385787196	0.255191806	0.310517317	0.352351477	0.77588151	0.788447436	0.235058215	0.848763173	0.018427748	0.095956549	0.923437243	0.940709945	0.832104895	1.182410018	0.329902521	0.505668846	0.364645295	0.12139844	0.794024819	0.071747747	2.199030344	0.048809634	0.229698134	0.227068494	0.909476091	0.643062244	0.2102124	1.650429184	0.486103745	0.289214298	0.074473532	0.310013224	0.119844504	0.33201683	0.655526152	0.320428019	0.219648082	0.248219314	0.501837685
E07000164	2011	0.486881466	0.556592564	0.602866808	0.319744256	0.17400935	0.187326924	0.607269381	1.657830657	0.294079436	0.385241503	0.248112801	0.309296414	0.356082424	0.770538229	0.779428913	0.234435262	0.849726798	0.021552152	0.096212019	0.905514872	0.934785491	0.818190242	1.161586929	0.321804024	0.501611912	0.361813003	0.122300053	0.794434549	0.070883127	2.162345042	0.048242361	0.227834208	0.222022792	0.900383865	0.629052249	0.20625102	1.728293293	0.476671055	0.28482547	0.071172921	0.303545913	0.118222257	0.334342655	0.651420566	0.318871216	0.219149162	0.254443269	0.514720437
E07000165	2011	0.469063383	0.553570364	0.590336866	0.319591893	0.168022819	0.17810403	0.592050864	1.654013623	0.293357607	0.380085399	0.242655128	0.296317685	0.349856083	0.782864164	0.766004526	0.229312943	0.837880277	0.019430402	0.095664637	0.889907504	0.925773046	0.798692088	1.14918535	0.312408815	0.488535734	0.359032998	0.119630331	0.76702541	0.070240797	2.12267367	0.048771926	0.22259339	0.21545791	0.882420244	0.623762504	0.200873994	1.647083292	0.457246462	0.280617074	0.080200863	0.297774169	0.115401717	0.317710207	0.630618996	0.318615712	0.211380695	0.24694425	0.51404804
E07000166	2011	0.457279239	0.545138868	0.583606251	0.312259887	0.16250077	0.17390092	0.579942901	1.660874487	0.291774409	0.37529723	0.240096216	0.299358257	0.343855226	0.76650867	0.768281452	0.227758674	0.832165554	0.018443437	0.094610155	0.886397288	0.916759995	0.785090529	1.14042622	0.309642917	0.477575199	0.361068786	0.11549257	0.7565276	0.066754744	2.123615623	0.047559738	0.220481585	0.211218241	0.879575359	0.630552285	0.198104208	1.653116935	0.457252899	0.274543294	0.082115803	0.291026963	0.110504864	0.306851602	0.617663964	0.323924015	0.205798005	0.238459427	0.502671252
E07000167	2011	0.493826728	0.555031919	0.609014492	0.318541325	0.171959381	0.190592423	0.609637321	1.654888929	0.297938331	0.393910679	0.253247581	0.312916573	0.354993351	0.759737696	0.785082937	0.235513885	0.854498957	0.026878207	0.094460247	0.919399557	0.936560016	0.824203487	1.178310436	0.328495837	0.506493474	0.364782951	0.122592188	0.789234516	0.07172281	2.17434256	0.046827773	0.229790765	0.226430204	0.907001509	0.630907844	0.210501517	1.712118291	0.491969644	0.28975332	0.071389124	0.311056826	0.119523135	0.34011184	0.654744283	0.319032836	0.222673461	0.255040077	0.505505579
E07000168	2011	0.479112515	0.54513859	0.599097116	0.319330109	0.17022997	0.183119893	0.595419809	1.678218215	0.290593084	0.382615195	0.250427689	0.306021854	0.349639977	0.761769672	0.776418984	0.227397869	0.839420473	0.021632838	0.094486753	0.902582677	0.922083353	0.813748751	1.153777638	0.322417833	0.500811531	0.359974343	0.119091312	0.775046471	0.070615826	2.153650682	0.047176484	0.22483589	0.223090451	0.891080265	0.623676643	0.205667759	1.64514106	0.479338405	0.285812281	0.07677019	0.304927789	0.117674962	0.332829475	0.644714309	0.314511587	0.217009668	0.246853278	0.488643606
E07000169	2011	0.462550393	0.55847357	0.589863104	0.314024253	0.163297068	0.172109429	0.588585746	1.688596294	0.290515704	0.373732855	0.236826102	0.296511417	0.352012075	0.783254166	0.772565297	0.23006986	0.836954852	0.016988873	0.09489697	0.882329421	0.926128047	0.780093534	1.143807566	0.305520324	0.482403335	0.36040595	0.118249683	0.768119928	0.067714061	2.132345537	0.049479088	0.223179552	0.20815307	0.888514164	0.63240037	0.196739743	1.699982718	0.457325388	0.274171504	0.081970018	0.290942771	0.110029443	0.306572852	0.615005763	0.325787649	0.206145025	0.237256031	0.510045366
E07000170	2011	0.441505339	0.548081154	0.573530912	0.325460382	0.152522399	0.168610685	0.561487069	1.877039125	0.296054206	0.373434452	0.242347426	0.292276138	0.334243401	0.816954452	0.771645275	0.230822485	0.830006529	0.014293866	0.096579391	0.88750476	0.92432491	0.791969749	1.159142745	0.31141208	0.477250758	0.358554982	0.110054853	0.764193218	0.065952032	2.17479863	0.049346128	0.217718891	0.210966136	0.871921727	0.656944389	0.196793683	1.501398489	0.456520844	0.273578439	0.097039422	0.294315142	0.115180051	0.292714396	0.620938624	0.325613956	0.198660284	0.222906034	0.490045008
E07000171	2011	0.464891654	0.560145239	0.596125003	0.321938953	0.164880194	0.178304706	0.593182404	1.753328779	0.297097732	0.379671923	0.24626824	0.301857749	0.352140346	0.80232804	0.783896997	0.232455387	0.842733193	0.017380202	0.097944188	0.902870097	0.93656965	0.804305751	1.167637304	0.316965349	0.493209268	0.363321302	0.11893884	0.778391048	0.070558105	2.172649059	0.048873805	0.225150792	0.216598683	0.906060824	0.649528234	0.20464109	1.630903223	0.468866583	0.282061904	0.085676256	0.299365051	0.116496067	0.316522178	0.638264718	0.326023904	0.213236961	0.241170202	0.504887042
E07000172	2011	0.465108401	0.559814184	0.596794135	0.309797208	0.170646914	0.17531057	0.606441792	1.667056446	0.288019768	0.370045432	0.238989859	0.294939137	0.360935229	0.789700229	0.767786488	0.230990977	0.830154312	0.017476805	0.100038505	0.878342648	0.932059762	0.786383994	1.145006146	0.304870882	0.488855626	0.352146751	0.121597801	0.756057314	0.073478325	2.101897571	0.049458612	0.226975202	0.211542626	0.905600777	0.626146962	0.203959353	1.632971503	0.451359573	0.282230582	0.07892355	0.290449361	0.113951689	0.324682632	0.627534087	0.321878866	0.217086799	0.244751455	0.51319475
E07000173	2011	0.468625014	0.561454305	0.597139606	0.318768423	0.168276682	0.176827702	0.600980082	1.741086377	0.294594058	0.377741794	0.242735021	0.295539346	0.357215781	0.805375617	0.771295314	0.233359792	0.836792342	0.017113282	0.100481039	0.895111084	0.9374423	0.794638208	1.163136837	0.310861098	0.490929576	0.358059784	0.120357244	0.768826176	0.072554722	2.14511652	0.0491914	0.228868285	0.214391183	0.91114062	0.641050575	0.205578676	1.615114197	0.460558939	0.282632272	0.087807242	0.298416201	0.115561132	0.318966057	0.634245898	0.323650287	0.216443268	0.240530027	0.51184835
E07000174	2011	0.442006381	0.544077497	0.572762057	0.320476534	0.153370134	0.168427986	0.564766093	1.831236051	0.292288159	0.371656837	0.240745216	0.290171463	0.335415922	0.805587838	0.764886722	0.22789692	0.822043098	0.01563793	0.096215459	0.879986927	0.914625463	0.782525391	1.151886421	0.30922252	0.475239561	0.356099414	0.111340298	0.751380932	0.06739667	2.143888127	0.048410949	0.217782001	0.208907515	0.877359904	0.64922323	0.198506255	1.489171275	0.453267766	0.274910211	0.096716988	0.291260449	0.1134631	0.293650796	0.61908784	0.322598807	0.200901464	0.226265296	0.488678311
E07000175	2011	0.472637568	0.560077822	0.600607365	0.323577091	0.167379689	0.181107715	0.600837272	1.740948764	0.296901322	0.380996284	0.245310608	0.298965795	0.354852035	0.803963767	0.775809637	0.233539428	0.841851458	0.017422299	0.097619667	0.901634806	0.93929043	0.806963679	1.169300651	0.318562794	0.495722674	0.361118461	0.120670007	0.781461645	0.072163375	2.150025128	0.048383082	0.22910714	0.217787598	0.910474018	0.641675959	0.205257733	1.628679485	0.469733714	0.28494684	0.088104461	0.301323372	0.117773783	0.322712428	0.644037553	0.321687757	0.215753566	0.243610676	0.509558642
E07000176	2011	0.476577981	0.567422803	0.604618636	0.309771071	0.177336729	0.181620942	0.617413459	1.577763357	0.28527554	0.374790243	0.23639274	0.294241667	0.364591459	0.775849846	0.764199952	0.233905989	0.840084774	0.020467355	0.099246977	0.876748286	0.934867038	0.784983129	1.134411365	0.302639996	0.494417489	0.353221491	0.12630375	0.759912209	0.074848335	2.076537517	0.050118433	0.227717851	0.212486312	0.899680799	0.610938521	0.203483557	1.762771265	0.445408104	0.281222967	0.073908816	0.291728925	0.113456129	0.333665357	0.630028144	0.320961558	0.218107008	0.255613728	0.538225174
E07000177	2011	0.472072284	0.579156628	0.610240338	0.319329513	0.173456508	0.175284901	0.622292358	1.672962591	0.292864744	0.379684093	0.234804608	0.288583604	0.371417102	0.816508339	0.770508687	0.233754197	0.842862363	0.018757384	0.103866132	0.885709392	0.956963311	0.769780479	1.154864137	0.300421489	0.492054368	0.35743899	0.125335271	0.754395912	0.076164298	2.097483745	0.050994149	0.232212346	0.207107118	0.932168271	0.633075725	0.206100868	1.690013542	0.441590644	0.281843388	0.102834036	0.287402499	0.111023828	0.322741814	0.616596659	0.329027389	0.2160887	0.24692165	0.542239811
E07000178	2011	0.428402825	0.550545019	0.566744474	0.298417989	0.1653566	0.153002106	0.588422248	1.709757016	0.272955934	0.349812343	0.209557913	0.253578738	0.360122539	0.81839159	0.722892677	0.218458882	0.777134221	0.015635164	0.106911881	0.797918027	0.892926445	0.68650402	1.073826382	0.260997057	0.451486174	0.32634504	0.118106168	0.674873828	0.075620206	1.927199481	0.048227684	0.217575524	0.184265276	0.899355966	0.595949708	0.188216347	1.443692131	0.38009596	0.267538047	0.106287365	0.259141059	0.102635879	0.292434628	0.57099791	0.31232875	0.202661518	0.22558688	0.507229597
E07000179	2011	0.501501416	0.596971632	0.639369233	0.324658717	0.186936513	0.187438986	0.647298097	1.669687732	0.300900077	0.389584614	0.243821131	0.303400994	0.383285415	0.817708094	0.799287129	0.243463687	0.87878579	0.020053884	0.102750942	0.920708691	0.977097431	0.810935171	1.185342236	0.314727003	0.517725608	0.368930635	0.130418298	0.795981161	0.077094461	2.1798665	0.053048406	0.240957307	0.221164064	0.948572992	0.636860412	0.211146964	1.888651668	0.468648333	0.291198926	0.089622736	0.303816492	0.115479078	0.350548501	0.655230589	0.330782523	0.225304031	0.260124097	0.558293553
E07000180	2011	0.494163638	0.585461299	0.627099722	0.322531283	0.18384749	0.184011163	0.641131235	1.633024291	0.297513794	0.3878116	0.243288525	0.302103857	0.381312328	0.809011813	0.799950633	0.241835343	0.868031134	0.020107856	0.103445378	0.912948847	0.973325	0.807290443	1.180201851	0.312569041	0.507904821	0.36644084	0.128056805	0.788558678	0.077151384	2.156196901	0.05199887	0.238124905	0.217523117	0.948158827	0.638498181	0.21043825	1.807377189	0.465937991	0.290904121	0.089914317	0.300248267	0.114766926	0.340868496	0.638130068	0.333102482	0.225539363	0.257521592	0.549851281
E07000181	2011	0.514079015	0.597835501	0.641641418	0.327977736	0.188934269	0.18824332	0.65560303	1.629542614	0.301214634	0.398175485	0.243598246	0.310431372	0.39106431	0.810793595	0.817987982	0.243474179	0.893342629	0.028551354	0.10466231	0.926248664	0.985489404	0.809147668	1.190174122	0.314196973	0.518069942	0.377731307	0.130862404	0.804200668	0.077297301	2.197306702	0.053306143	0.240337234	0.218999068	0.966374473	0.642921228	0.211243054	1.916394893	0.475162727	0.294305398	0.085749589	0.302232593	0.114030615	0.347328333	0.647937807	0.341086684	0.228220859	0.272212975	0.569005448
E07000187	2011	0.480584694	0.56485549	0.607072818	0.324025514	0.172967763	0.183071669	0.609042645	1.700751698	0.296225521	0.385877093	0.246495298	0.302502785	0.35768555	0.794266402	0.79200784	0.236155044	0.852935588	0.019790707	0.098296081	0.912675863	0.948105011	0.811416034	1.176109327	0.319214226	0.500531801	0.365554793	0.122406421	0.782671501	0.072244573	2.170149714	0.049512459	0.230269829	0.2203372	0.918866594	0.641238031	0.207300236	1.712850077	0.471665481	0.285920956	0.087812668	0.303746384	0.116264147	0.327472476	0.638229527	0.326468932	0.218200358	0.250064988	0.520221898
E07000188	2011	0.468478404	0.553769625	0.596142594	0.324186015	0.168117745	0.181429411	0.597211946	1.757469952	0.296429359	0.382252406	0.247882036	0.29802988	0.349039752	0.793198178	0.775439827	0.232107826	0.836834925	0.018092152	0.097038257	0.903239944	0.934026761	0.812275145	1.167361532	0.321150942	0.495853838	0.358981207	0.118714925	0.779632804	0.071725226	2.15266804	0.047685037	0.225804162	0.21946149	0.901295506	0.639190251	0.206064175	1.615102867	0.470714348	0.285070611	0.088775216	0.302936007	0.118515583	0.323824528	0.643740889	0.317490615	0.214627759	0.242792579	0.501330152
E07000189	2011	0.48000939	0.556461221	0.603676159	0.326436168	0.171964989	0.184830853	0.605132519	1.690670026	0.296984047	0.387811398	0.250876204	0.304079452	0.354025179	0.783945048	0.782515471	0.232880728	0.848295469	0.01979233	0.096355611	0.912292485	0.939259814	0.822224277	1.171573427	0.323234993	0.501653328	0.363268693	0.121036793	0.789217959	0.071390921	2.171277788	0.04783297	0.227687195	0.223096499	0.901385765	0.637046763	0.20837032	1.672925748	0.477564298	0.287230114	0.084797884	0.30650617	0.118541382	0.331091911	0.654260543	0.319846831	0.218414852	0.249410274	0.506875813
E07000190	2011	0.486385409	0.567694857	0.604283246	0.327993433	0.170672971	0.181188045	0.608479558	1.739656379	0.301365	0.389645566	0.244657901	0.299929682	0.361583193	0.807994725	0.792777975	0.236794064	0.856417734	0.018985012	0.098559689	0.917929863	0.94868341	0.803629781	1.175781318	0.316507037	0.502194829	0.365772786	0.121221688	0.7883892	0.070663885	2.197228853	0.04922393	0.23179408	0.217211856	0.918567389	0.648760649	0.206543866	1.691065686	0.476279411	0.28286555	0.088345317	0.297844089	0.114460878	0.322023271	0.645834629	0.326425122	0.21713473	0.247402215	0.516660157
E07000191	2011	0.524519828	0.564708958	0.636165463	0.34102437	0.188270096	0.205434573	0.638813476	1.69583212	0.303347099	0.409364247	0.272545517	0.329760483	0.364797271	0.756328639	0.812490495	0.24307702	0.885667879	0.027837238	0.095667287	0.966090597	0.961973971	0.883282922	1.220039599	0.352032875	0.538991823	0.374240843	0.128852197	0.843093164	0.075132761	2.274680276	0.047036587	0.236967371	0.248308875	0.923421941	0.642264384	0.224612108	1.790861726	0.521511704	0.307731149	0.073366974	0.333678487	0.129303099	0.371854343	0.717187211	0.31993236	0.236600068	0.27221178	0.510149695
E07000192	2011	0.45163039	0.555061322	0.584268319	0.31473945	0.160093196	0.169030255	0.58291551	1.778929748	0.295864239	0.372595699	0.237853758	0.291467297	0.349271674	0.814043092	0.772025331	0.229375165	0.829535925	0.016809306	0.099394345	0.883307347	0.930813934	0.780152959	1.152700077	0.307294843	0.481736157	0.359439633	0.114873513	0.749654583	0.06915975	2.128219113	0.049635278	0.222519216	0.206235376	0.899003545	0.642600642	0.199160778	1.551443923	0.450910802	0.278348426	0.090929461	0.289718819	0.112947057	0.302212561	0.617907707	0.327784808	0.205938162	0.234474867	0.509294656
E07000193	2011	0.452371378	0.549141402	0.586560997	0.309883443	0.168654106	0.171348487	0.598559415	1.690802648	0.288212413	0.368714314	0.23266325	0.283384064	0.350936912	0.791952462	0.752309276	0.226009804	0.810583249	0.018191389	0.099118735	0.869917205	0.923388685	0.767668578	1.132076561	0.299412182	0.476485145	0.347509169	0.119145842	0.728540708	0.074622218	2.044307198	0.048097419	0.223051353	0.204718779	0.903232558	0.62320943	0.202995449	1.54657266	0.434059569	0.277785816	0.097187614	0.284792042	0.112185383	0.310256733	0.601587779	0.314975567	0.213684377	0.242268319	0.511203444
E07000194	2011	0.490037354	0.577774916	0.620880382	0.327250688	0.17834601	0.186481514	0.624403854	1.7051751	0.301252055	0.389767641	0.251919854	0.309798513	0.370775716	0.803373345	0.794395194	0.240059687	0.870972451	0.019308727	0.099924157	0.919517357	0.960281773	0.829292288	1.190117294	0.325039005	0.512762068	0.371058175	0.126307845	0.811735382	0.073427345	2.204561317	0.050255779	0.233674982	0.224630964	0.921714457	0.642967118	0.208062238	1.781381556	0.480987229	0.292033913	0.082477839	0.308295836	0.119984499	0.340056051	0.655090368	0.328849541	0.222425602	0.254868685	0.532976536
E07000195	2011	0.457909537	0.556621655	0.590215216	0.327553126	0.162255029	0.175696642	0.583897904	1.829727007	0.298645884	0.380380321	0.248355742	0.295909729	0.346686651	0.823014939	0.779331754	0.230971409	0.839645745	0.015775755	0.099125988	0.901747379	0.93777592	0.812378849	1.175689263	0.318244378	0.494359071	0.363158011	0.115652668	0.782125575	0.069520886	2.181967788	0.047963417	0.224501745	0.218665201	0.896026862	0.652943929	0.203615917	1.54487905	0.470134262	0.284108364	0.092415725	0.301746302	0.119005161	0.313335806	0.641484554	0.323085642	0.210921131	0.232714054	0.495029175
E07000196	2011	0.496871434	0.576293945	0.624712339	0.323947449	0.180563092	0.189528415	0.631201453	1.73104441	0.302928194	0.389949826	0.252969608	0.314287072	0.370951403	0.810362077	0.801517592	0.241616703	0.869317789	0.020155937	0.10072187	0.928830876	0.964966802	0.839824427	1.198367432	0.328887216	0.512870932	0.372006392	0.127163381	0.81146694	0.07452603	2.2125348	0.050287824	0.23628632	0.226105992	0.939565754	0.650472197	0.212156651	1.747547453	0.486200771	0.296045094	0.076418782	0.314055041	0.121353894	0.343281381	0.663632833	0.327554184	0.227485161	0.257941819	0.528743368
E07000197	2011	0.479181455	0.569630475	0.611354041	0.322939102	0.177015317	0.181526406	0.619856875	1.715253107	0.29791859	0.381837552	0.24675001	0.298932867	0.365855719	0.814402539	0.784020419	0.234905581	0.848350583	0.018773386	0.101419992	0.907279158	0.951787758	0.810422668	1.173744481	0.317140786	0.500637134	0.362489152	0.123553222	0.782479829	0.074705191	2.150670453	0.049479535	0.231232912	0.218907552	0.925140483	0.639356365	0.208712789	1.675118565	0.465400665	0.290277016	0.089612372	0.30142753	0.118534051	0.333910493	0.650466254	0.321366983	0.222462241	0.252063922	0.521888823
E07000198	2011	0.491399241	0.575498967	0.620688708	0.334233887	0.174908704	0.189356071	0.618590604	1.805280835	0.305722344	0.394026738	0.259408333	0.316658224	0.364934708	0.816380268	0.809018476	0.241421477	0.875755981	0.017754078	0.099492897	0.938228125	0.963711581	0.851833163	1.211591699	0.335221469	0.515156252	0.375620155	0.123683164	0.821999231	0.071971723	2.260133535	0.049827409	0.232996656	0.230434387	0.921795731	0.663063266	0.211788845	1.73062535	0.495013622	0.294398504	0.082757483	0.317939314	0.122377126	0.335940613	0.67916338	0.330447193	0.222914242	0.251212109	0.520469988
E07000199	2011	0.436442571	0.553059386	0.577176974	0.329465512	0.15377697	0.165823273	0.564159016	1.840549658	0.296932131	0.375011627	0.241002271	0.286729139	0.340465088	0.831878821	0.779078324	0.231838213	0.834436163	0.014049985	0.099328326	0.883794168	0.933827782	0.789780574	1.159453253	0.310479061	0.477841665	0.363657847	0.11079687	0.764881037	0.067091895	2.157740307	0.050108453	0.216915297	0.209581937	0.875451096	0.654226779	0.194469795	1.510782726	0.451708422	0.276016541	0.104001021	0.291298175	0.11475966	0.289696962	0.605141016	0.330075579	0.198481028	0.22342772	0.499909402
E07000200	2011	0.498773151	0.57648048	0.626497427	0.339622421	0.180277727	0.191373497	0.626767932	1.721849252	0.305033813	0.400509336	0.258072955	0.316621832	0.368052945	0.806421266	0.808029955	0.242746419	0.882155575	0.020920906	0.100584978	0.939411034	0.975502664	0.849874962	1.208387533	0.334691331	0.515726945	0.378632437	0.126859079	0.820398237	0.074168685	2.244545259	0.050452791	0.23498062	0.229950071	0.933595401	0.652250186	0.212751243	1.789995237	0.49056503	0.295917841	0.088529727	0.31721671	0.123064641	0.344642472	0.672377071	0.330775266	0.22547548	0.260837255	0.53429997
E07000201	2011	0.445566953	0.547910526	0.575632313	0.314605618	0.156690775	0.166203375	0.576291972	1.757459761	0.289113191	0.371536804	0.231512058	0.283253485	0.342463404	0.79103112	0.762764097	0.225923479	0.823000834	0.018582572	0.099471	0.869535843	0.918510619	0.750392981	1.136145762	0.295887109	0.472171689	0.353619937	0.112409405	0.724749018	0.068926064	2.089484196	0.048252231	0.219525676	0.202402428	0.881969052	0.63475475	0.197889769	1.559479338	0.436889987	0.271054319	0.106769392	0.282753653	0.106199778	0.291131298	0.617877368	0.329603843	0.201916881	0.230043488	0.502327414
E07000202	2011	0.42079901	0.533863628	0.55798472	0.308676975	0.154214064	0.157708259	0.560431709	1.76056721	0.284959524	0.357766208	0.227534662	0.268839092	0.332586988	0.812149601	0.723251458	0.218525747	0.786650739	0.014880402	0.102945121	0.843276169	0.899090231	0.73795937	1.111992995	0.291159992	0.459951402	0.340160615	0.108885435	0.704992637	0.070808346	2.011864665	0.049024185	0.214849239	0.195290505	0.889565362	0.618921431	0.195892666	1.393467044	0.415392704	0.273552592	0.107215997	0.276850114	0.111072967	0.287596056	0.594013657	0.311061143	0.199227354	0.221900625	0.492691144
E07000203	2011	0.501380755	0.576841432	0.623739555	0.332105243	0.177497472	0.188590843	0.625739915	1.711074947	0.307155625	0.399079553	0.252165974	0.315354679	0.370321761	0.804214106	0.804683211	0.239601734	0.878293831	0.023205408	0.099067661	0.937473931	0.971912004	0.831268231	1.197269352	0.328614225	0.513183323	0.377719371	0.12687078	0.814596257	0.073112259	2.221326759	0.049957674	0.235827899	0.225558827	0.931902528	0.650032039	0.210917182	1.771117466	0.490672671	0.291354105	0.086913566	0.309320796	0.119623237	0.336934121	0.665033066	0.332632417	0.225331106	0.261308075	0.533928707
E07000204	2011	0.477945926	0.567292242	0.606401138	0.327070861	0.172932063	0.180130856	0.611265764	1.715473374	0.29872295	0.387172355	0.244537486	0.299037122	0.362720863	0.807789944	0.782394581	0.235683788	0.852006873	0.019422493	0.101942259	0.904959677	0.953455268	0.800241209	1.172534014	0.315248177	0.497334104	0.364967989	0.12262967	0.779765137	0.073231653	2.155694582	0.049878827	0.230329348	0.215222712	0.918474806	0.641327617	0.206962678	1.669777934	0.463812949	0.28532693	0.097093939	0.300572096	0.116534198	0.322657249	0.642374129	0.327153436	0.219165697	0.249506693	0.524906283
E07000205	2011	0.518627881	0.581424602	0.637360196	0.336729213	0.186496385	0.197334284	0.64283079	1.667270928	0.306371775	0.405593962	0.258591124	0.319586482	0.376978198	0.795283912	0.815509962	0.24415031	0.891856963	0.027017553	0.099776343	0.949840188	0.980930378	0.850749642	1.209737609	0.335166115	0.52720019	0.379568803	0.130720038	0.829744404	0.074998441	2.253236466	0.05010633	0.239525807	0.23229206	0.948789278	0.647460592	0.216099433	1.871784138	0.502836471	0.298999169	0.081614371	0.318580778	0.122075028	0.355999354	0.675508337	0.33179859	0.232271131	0.271191058	0.542699809
E07000206	2011	0.490942919	0.558465181	0.610232059	0.33814482	0.172847303	0.188907132	0.605048719	1.757660011	0.301831955	0.396475152	0.260084901	0.312645367	0.353366957	0.787913452	0.797772689	0.236656799	0.864701751	0.021032407	0.095855692	0.9330193	0.951111412	0.844635245	1.197193302	0.33527666	0.513320348	0.371344669	0.120322159	0.804657678	0.070990705	2.239507027	0.048204631	0.230722475	0.230313015	0.907284651	0.651377067	0.212342652	1.655845588	0.495492127	0.293405693	0.088555363	0.314812471	0.122555067	0.337353026	0.66889769	0.323753165	0.220770039	0.250418384	0.504475974
E07000207	2011	0.499841664	0.598972841	0.635913148	0.317265705	0.191998696	0.18642479	0.656157304	1.540263844	0.28773557	0.379677766	0.231826686	0.291032323	0.385644778	0.799692994	0.780501117	0.242437874	0.858889148	0.022274746	0.105285595	0.881867515	0.973480562	0.780555424	1.14876427	0.299462645	0.5073664	0.356506488	0.134581375	0.755797224	0.081768237	2.055268667	0.054392973	0.239847879	0.2109417	0.937245407	0.607843995	0.209538093	1.864265442	0.429287992	0.286949347	0.089792405	0.291374608	0.114003106	0.34953	0.614601593	0.324281249	0.226063138	0.266067971	0.578899689
E07000208	2011	0.490012876	0.589175733	0.634092216	0.311293305	0.200049807	0.185675719	0.667099884	1.56985412	0.284273587	0.370540487	0.229601287	0.287594681	0.389038421	0.806701026	0.774406357	0.236047905	0.835107293	0.0224316	0.107869061	0.870044051	0.968030736	0.774318174	1.139832224	0.299101403	0.50171101	0.345830797	0.135468557	0.745503009	0.084130976	2.008392369	0.053617776	0.239477524	0.20979128	0.955622175	0.601874666	0.212423063	1.785222027	0.423351203	0.291570795	0.094085553	0.29004578	0.11466596	0.363776288	0.612563936	0.311480557	0.230406917	0.263814451	0.561510575
E07000209	2011	0.48813528	0.589962544	0.624485911	0.318212376	0.185779045	0.178949987	0.640145441	1.652132532	0.28494701	0.375847812	0.230086909	0.290886742	0.384825077	0.811926382	0.779392773	0.238421881	0.853394951	0.02043138	0.106817954	0.871785807	0.956071836	0.770138585	1.14156225	0.294445706	0.500729471	0.357850056	0.13120129	0.766253558	0.077377181	2.093568411	0.051888041	0.235647385	0.209203079	0.933304033	0.611952583	0.201371403	1.869962171	0.43763211	0.283294163	0.089942045	0.2893746	0.110791195	0.337842817	0.62526744	0.324880779	0.221120693	0.257327656	0.556266695
E07000210	2011	0.506554687	0.592283626	0.639080677	0.328511266	0.190991949	0.192777186	0.650352674	1.634183668	0.296799425	0.38971987	0.251672744	0.311368219	0.382771937	0.808914949	0.809620006	0.246315759	0.879692702	0.019981624	0.104585435	0.926400944	0.979962158	0.835141221	1.195477068	0.323147209	0.525643036	0.37115938	0.131656226	0.804462173	0.078479094	2.201696894	0.052682075	0.242071261	0.227051826	0.948092794	0.638755637	0.215225923	1.893496037	0.473000929	0.297634067	0.077123667	0.30884248	0.120127735	0.358957463	0.662468173	0.328903142	0.231620874	0.265531184	0.555934049
E07000211	2011	0.488190124	0.593506034	0.627902121	0.31953767	0.192968337	0.182134797	0.660055791	1.578692151	0.284006328	0.376569591	0.230061315	0.283877103	0.391758103	0.824011754	0.763039582	0.237912842	0.838287962	0.02116553	0.114149637	0.868636349	0.966951182	0.76655821	1.139424788	0.294666896	0.500529265	0.351282196	0.136711166	0.760481002	0.082472744	2.039542752	0.052464556	0.239643835	0.206859481	0.964426697	0.608998722	0.209768923	1.783809551	0.423705578	0.28821167	0.102996252	0.289874521	0.114287313	0.350083611	0.611102783	0.31896166	0.230157236	0.258871387	0.564315585
E07000212	2011	0.475156371	0.579579977	0.615756258	0.314523977	0.184026657	0.176489859	0.635583032	1.638143239	0.284795227	0.375575523	0.233937189	0.285929863	0.380324975	0.824857448	0.762683559	0.235998361	0.832869398	0.019186906	0.110695009	0.871248361	0.952220142	0.76596187	1.141690194	0.295015031	0.495858065	0.34956088	0.131413439	0.75773585	0.079936154	2.068966851	0.051473811	0.234974196	0.208653949	0.940327188	0.616824708	0.207165985	1.703706927	0.431919352	0.285598625	0.095795833	0.291053653	0.114977423	0.335493366	0.618430332	0.318017569	0.225639547	0.252841536	0.544459114
E07000213	2011	0.502171333	0.601662759	0.637482742	0.323918277	0.194800662	0.182369258	0.660765192	1.618287108	0.286230207	0.378794376	0.232902548	0.296230776	0.400179203	0.819339431	0.78833963	0.240444068	0.862457749	0.021635066	0.108067248	0.887788638	0.969485367	0.779626694	1.158061425	0.297140859	0.508641395	0.361535689	0.135162252	0.774775162	0.080523215	2.127418214	0.052717395	0.240896663	0.21143256	0.954314981	0.620277	0.208503335	1.898029002	0.444946951	0.29053528	0.098699105	0.290193751	0.110689308	0.351332942	0.614483083	0.326421453	0.228982246	0.262081174	0.561097076
E07000214	2011	0.501710347	0.597253706	0.633550404	0.323574112	0.186672199	0.184332758	0.64929606	1.641336807	0.29951218	0.389554876	0.238278049	0.302902465	0.389049852	0.817888679	0.805268333	0.243187019	0.879548869	0.020932584	0.104670513	0.909156369	0.98076141	0.801115129	1.1759716	0.308169553	0.510694196	0.37150676	0.13217207	0.801643575	0.076295185	2.160049095	0.053257291	0.239574681	0.215889338	0.954183902	0.633091112	0.206799696	1.905861071	0.461217181	0.288078798	0.088433574	0.298566468	0.11263762	0.341505181	0.629013484	0.334707995	0.2241667	0.259737572	0.569089158
E07000215	2011	0.49886442	0.586640599	0.624563095	0.333357386	0.183704938	0.188866199	0.635366753	1.669090675	0.302463844	0.397177405	0.247630358	0.309051719	0.3752735	0.813762124	0.800590371	0.242734946	0.879354897	0.021771683	0.103607158	0.917337465	0.97666074	0.822226588	1.187605316	0.320010121	0.512167567	0.370880522	0.12983098	0.802648681	0.077015509	2.1736482	0.052545132	0.234939307	0.222371351	0.938958918	0.639131773	0.209235008	1.800137759	0.466375754	0.293388386	0.08355821	0.306989926	0.120191043	0.341603222	0.658205964	0.333499425	0.224993822	0.269099568	0.558728798
E07000216	2011	0.516040369	0.600016459	0.64815984	0.340552557	0.190259765	0.192733402	0.651372759	1.641816191	0.298949399	0.400139807	0.248007601	0.313823574	0.384858681	0.807753272	0.811407122	0.248634811	0.899443492	0.021623897	0.102758241	0.930024141	0.991320023	0.828869526	1.198151733	0.322729126	0.525743369	0.379556192	0.133105617	0.826752875	0.076489479	2.221713127	0.052840121	0.244469402	0.22559077	0.944540935	0.637440955	0.211755304	1.97366331	0.476057639	0.293323489	0.085955931	0.312841139	0.118557533	0.353799048	0.652460888	0.333176157	0.229092845	0.268565228	0.571998963
E07000217	2011	0.465379588	0.577287874	0.609773092	0.318836063	0.185003275	0.175182572	0.639487428	1.621661681	0.278779748	0.362688482	0.223426592	0.275577966	0.377566489	0.814599355	0.742700497	0.230130379	0.81370699	0.018316041	0.106345201	0.848655156	0.949928429	0.747408182	1.123968893	0.287455991	0.48289457	0.338055461	0.128924063	0.71291562	0.08149442	1.967289514	0.049991358	0.232983211	0.200528086	0.92699353	0.607882715	0.207198363	1.629579153	0.405118588	0.285450325	0.108026626	0.276195411	0.111549961	0.334288342	0.5934569	0.311055293	0.223066475	0.249793939	0.546670235
E07000218	2011	0.480327971	0.577726147	0.610520723	0.328699947	0.170653976	0.181589059	0.607797223	1.785281446	0.302579647	0.388735997	0.249653868	0.313216119	0.363637834	0.814850543	0.800756879	0.238370406	0.870374732	0.018099434	0.100358058	0.915264911	0.956183668	0.821519496	1.186883051	0.320408773	0.503434091	0.373153062	0.120905672	0.804765728	0.070669855	2.217718188	0.050579182	0.229731893	0.221755048	0.916841083	0.656347942	0.204541105	1.733883256	0.479545975	0.286826441	0.079398767	0.306367507	0.117862535	0.323116224	0.655507321	0.33339122	0.215745046	0.248839477	0.522920896
E07000219	2011	0.445127672	0.546732553	0.58006395	0.311720129	0.162231687	0.169594324	0.585205586	1.725390766	0.288757042	0.367229457	0.23677139	0.285979856	0.347063944	0.797635401	0.754124248	0.227122147	0.815076703	0.016092308	0.098938323	0.867616995	0.91790098	0.773953703	1.137280462	0.30346907	0.474942453	0.349095157	0.115276353	0.736913547	0.071535611	2.079186748	0.048507887	0.220504559	0.206795211	0.888980948	0.630114187	0.20032318	1.533585609	0.440113658	0.276998902	0.093597536	0.288232334	0.113248138	0.304974376	0.608106767	0.318338544	0.208188017	0.233074691	0.501997458
E07000220	2011	0.45125912	0.559763172	0.590014655	0.314040847	0.172553693	0.171627211	0.604644189	1.646568977	0.288024785	0.36974844	0.235631796	0.278389239	0.361145602	0.81981018	0.736451926	0.230076293	0.809367397	0.017345341	0.110321353	0.860871874	0.935393798	0.768113014	1.133099966	0.29706491	0.483987915	0.345879689	0.121914643	0.752333084	0.076944499	2.037410517	0.049654409	0.229017802	0.206562458	0.918244615	0.618316322	0.204868109	1.565392359	0.429618346	0.28210868	0.099008373	0.291964556	0.117671041	0.319830926	0.610773279	0.313158206	0.220807153	0.23914746	0.524436981
E07000221	2011	0.512721956	0.587996839	0.636735673	0.336984875	0.185069601	0.194964712	0.640588096	1.72088583	0.305718176	0.40096899	0.258613759	0.320165277	0.376163154	0.80603485	0.817398315	0.247446682	0.89207967	0.021155126	0.100484055	0.95134002	0.978124217	0.851810069	1.216499336	0.335013916	0.524379343	0.379717502	0.128171703	0.82814227	0.074442975	2.275180982	0.050912123	0.240039888	0.231033444	0.941902244	0.656456816	0.215067241	1.875125017	0.496537621	0.298868421	0.0799131	0.318471729	0.122016952	0.348750766	0.678103267	0.331629557	0.227344143	0.26477946	0.54395065
E07000222	2011	0.463655624	0.566109056	0.596882913	0.305717495	0.176136023	0.171693135	0.612446314	1.679305842	0.283822371	0.366256828	0.228028362	0.283345538	0.366181464	0.805156437	0.759884173	0.228694019	0.821341639	0.018044514	0.103070356	0.8584278	0.925716302	0.760284012	1.123607386	0.290656336	0.488877009	0.345677627	0.12385304	0.737561612	0.075197741	2.055714863	0.04999955	0.226452941	0.205025245	0.912210025	0.61035493	0.199778503	1.676788737	0.431874353	0.278963204	0.085080257	0.283295169	0.110378381	0.324574292	0.625319347	0.318241851	0.214850544	0.244341802	0.523160687
E07000223	2011	0.487153906	0.572134024	0.615819006	0.334641051	0.175534838	0.188488455	0.625329812	1.802300293	0.304031542	0.396065242	0.259496487	0.30875213	0.363179294	0.814395945	0.795992413	0.241800173	0.865183959	0.016770033	0.10062545	0.941135908	0.970380166	0.839635813	1.213658299	0.332730065	0.51622511	0.367235997	0.122267328	0.792925533	0.076209945	2.22763287	0.04981955	0.238885186	0.22865354	0.934131393	0.663473059	0.219424986	1.573291396	0.4837135	0.298535497	0.089488649	0.314579862	0.123962104	0.337594158	0.6587549	0.324806555	0.226179201	0.25199599	0.513102313
E07000224	2011	0.512151602	0.577900726	0.634801593	0.349104141	0.184210985	0.200219153	0.638182611	1.803058816	0.309759297	0.409232708	0.26986908	0.323943588	0.367378772	0.812535935	0.817889313	0.245673908	0.888352721	0.019149082	0.099792457	0.969366361	0.986326295	0.880614236	1.237864544	0.348129288	0.535256568	0.373981783	0.124909379	0.831021928	0.075885709	2.302420406	0.049901596	0.242349207	0.241318087	0.93986041	0.667852188	0.22515527	1.69544714	0.508641418	0.306867244	0.087564565	0.330957509	0.129371586	0.358055088	0.700902312	0.326228476	0.235025024	0.260550849	0.51775159
E07000225	2011	0.518867249	0.586005675	0.641022595	0.342355096	0.190175267	0.199786472	0.64965781	1.708639711	0.305446656	0.409143602	0.26460955	0.319233833	0.377648388	0.803788378	0.815034171	0.243754438	0.892285367	0.024082438	0.10051008	0.95507835	0.985968557	0.864963052	1.223133817	0.339604255	0.537236677	0.376772049	0.130663848	0.826072384	0.077946109	2.25904988	0.050168239	0.242362595	0.238420948	0.950187737	0.650951921	0.221780292	1.799313664	0.501009363	0.305750675	0.085311374	0.323895644	0.127005884	0.364866741	0.686892351	0.328241128	0.237199363	0.27159634	0.536857822
E07000226	2011	0.436897284	0.560952152	0.581352378	0.307788271	0.173515018	0.161801002	0.610473409	1.643815631	0.27741482	0.355714257	0.215732217	0.25782805	0.366042542	0.825069082	0.724512956	0.22271814	0.778898017	0.016280417	0.108705658	0.825594984	0.92794271	0.715086126	1.091547755	0.272456421	0.46303789	0.326275814	0.123338477	0.692455349	0.081730621	1.91035815	0.050140313	0.226439943	0.188149004	0.938756566	0.6057628	0.202891125	1.425067443	0.391125251	0.274047753	0.123373416	0.266741288	0.106858971	0.311035289	0.564702912	0.307059547	0.217794798	0.237113705	0.520068874
E07000227	2011	0.518017204	0.603434283	0.648653237	0.338797239	0.189506775	0.192774255	0.655716491	1.68921115	0.307933288	0.405792522	0.252310739	0.31709008	0.389884209	0.822347224	0.826117243	0.248773065	0.906027937	0.023799912	0.104148612	0.948664686	0.999459228	0.836802788	1.21730185	0.325335323	0.528768152	0.384444524	0.133731202	0.827883583	0.076911476	2.264748854	0.053053521	0.243803225	0.22713789	0.963980016	0.653755851	0.214490062	1.949173035	0.48955217	0.297434479	0.087827791	0.313177638	0.11808297	0.349727628	0.662049111	0.341270776	0.230767429	0.27009235	0.570035065
E07000228	2011	0.504732037	0.596058216	0.635885667	0.334774223	0.181280313	0.187248435	0.639092199	1.71128881	0.305046578	0.399887993	0.246889494	0.308000066	0.379696134	0.821313984	0.8172738	0.244989713	0.89323132	0.020995844	0.103288491	0.931783585	0.982206795	0.817275314	1.195718642	0.317938719	0.517611539	0.379654042	0.131072037	0.813578937	0.074379166	2.224620189	0.052575306	0.23961886	0.220140067	0.940777331	0.646305098	0.209043469	1.895044343	0.476217102	0.289033076	0.092489465	0.307746984	0.115288504	0.336525698	0.653281786	0.338565076	0.223882126	0.261990051	0.561210485
E07000229	2011	0.490066184	0.576185579	0.617449676	0.336440495	0.178365007	0.183754704	0.624005069	1.747479133	0.300634282	0.395507067	0.248780589	0.301134418	0.368083868	0.821951361	0.795932175	0.238458162	0.867151171	0.020621376	0.101276109	0.921332372	0.963960168	0.815532663	1.191895712	0.319209157	0.511543537	0.367237767	0.125146803	0.778388574	0.076269758	2.197563546	0.050555751	0.233751896	0.221749199	0.927539997	0.647085159	0.212455038	1.687739607	0.466106429	0.292493307	0.097594805	0.30464493	0.11893739	0.332030861	0.651421606	0.328234898	0.222690148	0.254986328	0.533273382
E07000234	2011	0.496106831	0.580288537	0.622042503	0.331439328	0.178434087	0.187795547	0.624838301	1.705408252	0.301204788	0.393654538	0.252441688	0.309453941	0.369751355	0.808182436	0.80828645	0.244066369	0.876779561	0.019682063	0.100443117	0.931634476	0.969947347	0.832043499	1.200544061	0.326355706	0.515640285	0.374146626	0.125760384	0.810046701	0.073145059	2.221836335	0.051145469	0.23552073	0.225139201	0.930885432	0.650768709	0.210306579	1.796833363	0.483703926	0.292252131	0.083689769	0.3104842	0.119194802	0.336576296	0.660317179	0.331617159	0.221715428	0.256013165	0.539619177
E07000235	2011	0.50601084	0.574397992	0.627633151	0.340916501	0.181324532	0.197871922	0.62623185	1.744572468	0.307798396	0.40565915	0.26751442	0.32452339	0.363594896	0.797888674	0.813480514	0.242785434	0.885173609	0.022028314	0.097114457	0.952925729	0.97222557	0.878030945	1.221426399	0.346444963	0.528840687	0.378698166	0.126580732	0.840843893	0.073788613	2.272784842	0.049466773	0.235344393	0.240004036	0.92861378	0.655420774	0.217050413	1.755679236	0.508637886	0.3023225	0.075110381	0.326864452	0.127730749	0.354075426	0.698916364	0.328288999	0.228754937	0.262287394	0.523150303
E07000236	2011	0.436783642	0.551261069	0.575648969	0.312414342	0.157196671	0.165607805	0.576931065	1.772700694	0.290616523	0.368102321	0.233781483	0.279408982	0.344173881	0.808715622	0.752857562	0.224389304	0.81712894	0.015508902	0.099061743	0.863267894	0.923009788	0.75671039	1.139815795	0.300946232	0.471572397	0.351398047	0.114044109	0.732366947	0.071109509	2.070714335	0.04850143	0.221392959	0.202911925	0.896293593	0.639315542	0.198315123	1.473851808	0.439502616	0.273750128	0.106884488	0.284230013	0.110481727	0.295759377	0.603098905	0.323420009	0.203697748	0.227177446	0.499361818
E07000237	2011	0.436170595	0.550435947	0.571540722	0.310801961	0.157383309	0.162758291	0.571681434	1.749635942	0.287331336	0.363598897	0.229845363	0.277175982	0.34550518	0.813288216	0.747770224	0.226295017	0.813159198	0.015388796	0.099381355	0.853304669	0.911878267	0.752885095	1.12618733	0.291971027	0.469905196	0.346124613	0.113078417	0.72743366	0.069912773	2.077035488	0.049520665	0.216044342	0.200054615	0.872984665	0.628340896	0.193294161	1.522331791	0.428164599	0.271269377	0.095262482	0.282400958	0.109920923	0.292199592	0.598968422	0.32149816	0.200392325	0.224488268	0.50216042
E07000238	2011	0.508929696	0.582602051	0.632016039	0.334217366	0.182018833	0.191221045	0.635463662	1.730735185	0.306135051	0.399031474	0.255753509	0.316046886	0.375088644	0.807509188	0.816445301	0.243561192	0.883590241	0.02197305	0.10084899	0.944421904	0.976344857	0.841090163	1.208025817	0.332032862	0.519392032	0.378318611	0.127576897	0.8225191	0.073974301	2.249681917	0.050623112	0.237002083	0.228130325	0.940246732	0.654111584	0.213004662	1.807148245	0.494874659	0.29599569	0.084415416	0.314929982	0.12138049	0.343923692	0.672310495	0.329838204	0.227404331	0.264675471	0.537032975
E07000239	2011	0.494592945	0.571810016	0.615199602	0.328192835	0.170328104	0.186889923	0.61402432	1.789196545	0.302121613	0.394079113	0.252616242	0.310414753	0.364766194	0.801729891	0.801062374	0.239391259	0.871066064	0.020609248	0.098750426	0.926482104	0.957341969	0.817943617	1.195270755	0.327569608	0.51194639	0.373078724	0.123682302	0.800250288	0.072425902	2.222845559	0.048881674	0.234074508	0.223588449	0.925891042	0.656001431	0.209960367	1.697198565	0.492265934	0.290390388	0.08375923	0.308916916	0.118775767	0.329000453	0.670715275	0.334272736	0.220654411	0.2512741	0.517298084
E07000240	2011	0.489806599	0.59535538	0.632388982	0.317109815	0.190867293	0.180069297	0.650302175	1.545082283	0.283021236	0.3739099	0.221713612	0.283008269	0.387245379	0.801469886	0.770775517	0.240523493	0.848848018	0.021397546	0.10781201	0.861409634	0.958664746	0.753041867	1.128813198	0.288670867	0.492504167	0.353619201	0.133559433	0.760052017	0.078998875	2.04132447	0.054073235	0.238196995	0.201487734	0.943111995	0.602215537	0.202465558	1.898593978	0.421877103	0.28009808	0.096864187	0.285844223	0.108226185	0.341913638	0.586320287	0.321965023	0.222060528	0.255693668	0.573488788
E07000241	2011	0.430756666	0.53156522	0.565514781	0.274325269	0.179823882	0.16404348	0.613862453	1.462037989	0.262162453	0.333589784	0.212574866	0.25085294	0.358012322	0.771603297	0.691983911	0.215038961	0.737212267	0.017709143	0.10126287	0.790983698	0.891938988	0.708799745	1.052313029	0.268683655	0.460829348	0.304268538	0.12352885	0.649892613	0.082492614	1.785906998	0.047080494	0.218145094	0.187459137	0.892561298	0.567281093	0.201861971	1.369921831	0.372162461	0.278761058	0.092306837	0.264488196	0.108040444	0.332374076	0.567770369	0.285084546	0.21656045	0.241073782	0.50131478
E07000242	2011	0.476673247	0.587074986	0.613492474	0.322450088	0.175784133	0.176602587	0.619174919	1.699375472	0.297824626	0.378853099	0.237665116	0.292890326	0.370237678	0.840045042	0.787628809	0.240149998	0.857508656	0.017698649	0.106001352	0.896482619	0.963873596	0.790548929	1.166424096	0.306639412	0.50093149	0.365248136	0.123469921	0.78079829	0.073579375	2.148692404	0.052985151	0.232581728	0.211455624	0.933847083	0.63671019	0.203146441	1.777657524	0.448137037	0.28546649	0.090445913	0.292960403	0.115364142	0.327969415	0.638334044	0.331452434	0.21412415	0.248070396	0.552861721
E07000243	2011	0.438281274	0.558691477	0.57529995	0.320733399	0.159344887	0.162354307	0.575050306	1.713606384	0.290204547	0.371864091	0.227450659	0.273829518	0.350396362	0.832676226	0.75327008	0.229367889	0.814774959	0.016426471	0.108028399	0.857643683	0.929135085	0.742944275	1.125002956	0.288359575	0.473085293	0.349646575	0.116661605	0.739909736	0.070922381	2.073142406	0.050922874	0.222130945	0.198785585	0.896694588	0.628422096	0.195035655	1.568883628	0.424959114	0.269400005	0.110078856	0.279556273	0.110290651	0.290356807	0.587308319	0.327009567	0.20469719	0.22786846	0.521591472
E08000001	2011	0.413542356	0.515369736	0.548876125	0.293591539	0.158423589	0.158608733	0.568440824	1.639885354	0.269856704	0.340300183	0.219134523	0.257596173	0.331782743	0.771309133	0.697623374	0.213765577	0.746274425	0.01454682	0.096659483	0.810783729	0.883480974	0.717025106	1.070438396	0.280063857	0.446370951	0.317085561	0.111806932	0.664659705	0.074749254	1.873617	0.045602016	0.212599874	0.192465852	0.856921988	0.594186502	0.19566349	1.310102192	0.393768134	0.265309215	0.101720194	0.266652491	0.109202541	0.29146923	0.556731709	0.291254459	0.20557742	0.223345804	0.475093908
E08000002	2011	0.439980085	0.541120499	0.573134882	0.305911958	0.165092535	0.165504095	0.586095082	1.633087415	0.279530605	0.356492608	0.226171653	0.272431524	0.348350819	0.787835283	0.730469808	0.223017101	0.790280782	0.016376927	0.099380481	0.840424305	0.907806953	0.740916118	1.100906604	0.289099245	0.464941694	0.336842732	0.117217427	0.714190992	0.073207825	1.986993287	0.047873331	0.219965318	0.198715975	0.883646514	0.607122469	0.196845939	1.501003617	0.418328728	0.271173464	0.097160759	0.275545507	0.110034395	0.305233404	0.581293337	0.306604622	0.209028294	0.232235173	0.500954722
E08000003	2011	0.329241554	0.475658153	0.47854401	0.25338006	0.141404661	0.125779029	0.50359645	1.497276917	0.235462802	0.292495725	0.18498707	0.20320532	0.303656703	0.762226236	0.564518779	0.191151363	0.627572429	0.012252124	0.116085915	0.671822708	0.782791314	0.567842666	0.933257905	0.2178291	0.387683288	0.263328301	0.101333665	0.545704033	0.07717449	1.543067018	0.041499949	0.192123073	0.154601563	0.793207032	0.517762689	0.176107057	0.963550781	0.293689103	0.242458319	0.10511601	0.224942609	0.101871808	0.25099914	0.471455439	0.25696485	0.190822165	0.190194062	0.446224964
E08000004	2011	0.398356075	0.501712284	0.533044137	0.296414381	0.153007281	0.154483286	0.554143133	1.640024959	0.266866797	0.335121277	0.214156955	0.248826475	0.319818948	0.762004975	0.679649946	0.210644897	0.726590767	0.013349149	0.092558304	0.794040415	0.869387297	0.702021109	1.047509565	0.275023652	0.433121117	0.307031415	0.105962323	0.640396086	0.073430736	1.822171346	0.044076231	0.206721304	0.18759673	0.842978529	0.586503897	0.192240157	1.227611848	0.378525049	0.26064531	0.107645383	0.257969442	0.10756289	0.281077643	0.53626447	0.283450769	0.199701094	0.216858928	0.46113298
E08000005	2011	0.404494285	0.51136448	0.543382474	0.295489458	0.159461339	0.157425678	0.568434125	1.624247858	0.266563885	0.335039261	0.216391601	0.252799431	0.32885498	0.770463633	0.691124609	0.21343866	0.734072835	0.014034252	0.095447111	0.800831994	0.881938862	0.710146592	1.056923964	0.27675942	0.440583665	0.308802299	0.109233262	0.651591336	0.075041589	1.832810792	0.045236579	0.209275965	0.190084133	0.857139633	0.590043663	0.194857379	1.263430518	0.379738973	0.265482833	0.104715685	0.261096859	0.109561929	0.2894308	0.544628329	0.285506367	0.204885371	0.222505286	0.467901778
E08000006	2011	0.396177783	0.515094466	0.531190984	0.299682672	0.14588306	0.150209789	0.532374766	1.746685017	0.270640796	0.342650517	0.218362884	0.252665348	0.319847928	0.794844667	0.684943554	0.211850682	0.750735842	0.014031839	0.105633385	0.798262898	0.864576816	0.698855737	1.065511652	0.272681683	0.439854433	0.321729645	0.10620311	0.673920091	0.069726867	1.934841764	0.045904957	0.206567524	0.187804629	0.837429393	0.598772623	0.186974626	1.288793833	0.388900562	0.257676675	0.102984492	0.263930059	0.108832637	0.270183973	0.565411172	0.298698102	0.192988066	0.208455659	0.470301747
E08000007	2011	0.455123834	0.547263858	0.584532122	0.307296789	0.170491197	0.172419617	0.599933891	1.627571625	0.280856719	0.36245438	0.230579461	0.280421334	0.353693962	0.779585249	0.740384051	0.225000636	0.802986557	0.017854454	0.098512246	0.857239948	0.915911486	0.761302031	1.116267793	0.295627239	0.47738576	0.340592681	0.120792447	0.725138407	0.07460679	2.018028467	0.047977496	0.22408371	0.204666354	0.891653211	0.609067033	0.201876598	1.563957754	0.430045204	0.277081205	0.087247717	0.2805545	0.111846371	0.318399639	0.597639856	0.307323363	0.214353771	0.241332157	0.508213774
E08000008	2011	0.421786452	0.528863015	0.555959933	0.309866153	0.1549463	0.160916606	0.559238952	1.757739586	0.280812961	0.353915428	0.229471999	0.272036779	0.330628408	0.795281257	0.721263399	0.218869408	0.781627846	0.014807455	0.097952806	0.838881035	0.891389481	0.746241519	1.105853028	0.292814039	0.457799309	0.336560892	0.110266547	0.705692243	0.070255845	2.013136422	0.04715172	0.212498772	0.198863939	0.865882878	0.619430097	0.194462084	1.383875513	0.416105159	0.269464582	0.096415341	0.276723794	0.11263281	0.287880425	0.588662418	0.304691054	0.200515555	0.223048453	0.481149533
E08000009	2011	0.443689095	0.545855989	0.576957101	0.303847663	0.169608421	0.167772789	0.595887894	1.595400024	0.276335334	0.355272539	0.223836782	0.27207757	0.351417944	0.785453779	0.73604187	0.225815686	0.790075513	0.01613817	0.099054944	0.84161689	0.915740245	0.741248552	1.103311697	0.286827268	0.470220937	0.332805859	0.118253248	0.703123228	0.075437728	1.967636803	0.048967623	0.222013801	0.199158668	0.887423817	0.60544593	0.199281029	1.537211541	0.410269866	0.27321584	0.094228179	0.274858152	0.109447979	0.309930654	0.578027934	0.306969704	0.21005748	0.234908571	0.513279196
E08000010	2011	0.44070009	0.544397671	0.572624619	0.315688742	0.155905638	0.166918686	0.567654777	1.77485842	0.289703577	0.366810378	0.233966864	0.286334228	0.339360524	0.803048678	0.75851115	0.226169588	0.816314058	0.015258425	0.097509649	0.867976266	0.91520523	0.767943938	1.133988298	0.30160699	0.471325982	0.352922999	0.112519555	0.741442245	0.068084594	2.101766907	0.04871532	0.217367347	0.204464232	0.876694584	0.63685791	0.195099638	1.532339048	0.441414888	0.270056137	0.095067084	0.285455978	0.111195875	0.294190313	0.606416566	0.321616365	0.201754261	0.226513992	0.494342819
E08000011	2011	0.431319071	0.53595118	0.561170567	0.316276048	0.151953856	0.163515065	0.555361799	1.781179758	0.287622965	0.364185177	0.232916229	0.279753782	0.332406203	0.807501275	0.750165349	0.223246486	0.80316801	0.015323653	0.096732791	0.859428758	0.904998087	0.761429454	1.12326071	0.300005531	0.466504055	0.345358972	0.108792244	0.733425391	0.067353348	2.088159015	0.048279985	0.213047398	0.203761514	0.866309649	0.634256289	0.193362491	1.444034168	0.436094214	0.268843769	0.09398405	0.284651197	0.11188645	0.28622009	0.596106123	0.316746721	0.197298599	0.222050828	0.486554958
E08000012	2011	0.39606084	0.516560029	0.534232352	0.289627742	0.149491029	0.150654229	0.539801587	1.733218443	0.268458602	0.334821843	0.218065263	0.256483624	0.324126739	0.791421491	0.696145964	0.211311297	0.749853607	0.013809656	0.10052903	0.794738526	0.860750837	0.708674333	1.063180893	0.273280108	0.442252291	0.319576078	0.106028629	0.67241765	0.069824674	1.922106968	0.045964514	0.20530622	0.190231365	0.837247078	0.595071235	0.185114566	1.29159124	0.391039966	0.263318455	0.085860505	0.265857033	0.109011936	0.279318257	0.572853447	0.299214814	0.193844037	0.211147488	0.458951602
E08000013	2011	0.443086204	0.540635307	0.57442436	0.315788583	0.159478176	0.169991958	0.571142371	1.755229384	0.287344136	0.365618374	0.239982744	0.288804232	0.340115903	0.795518943	0.755905342	0.225976791	0.812947625	0.01538484	0.09747022	0.871218973	0.910342644	0.784395332	1.135961517	0.30748007	0.476071585	0.349814334	0.112913497	0.751258465	0.068656838	2.105784618	0.047870385	0.217626831	0.20995545	0.871689625	0.632163551	0.197624855	1.514261324	0.447237763	0.27564497	0.086941172	0.290725857	0.115337056	0.304437535	0.613915423	0.314314486	0.205288146	0.227995219	0.487769092
E08000014	2011	0.472674523	0.553880889	0.591168311	0.325109587	0.167220547	0.178986464	0.592014864	1.746666739	0.295132042	0.379994724	0.246088987	0.299472568	0.350050283	0.798726597	0.775492156	0.230962156	0.834985051	0.017755522	0.097849723	0.901843566	0.932590832	0.809017282	1.15909911	0.317488298	0.495902418	0.358640817	0.118191015	0.775540287	0.07036823	2.163613207	0.04864911	0.225544551	0.218152463	0.895924211	0.637346176	0.204193624	1.586045468	0.468448619	0.282776112	0.083189272	0.299620546	0.117705201	0.321834126	0.640033477	0.318074622	0.213831503	0.240640899	0.50034027
E08000015	2011	0.456534606	0.545457149	0.579525048	0.316531922	0.163640154	0.174007072	0.58090371	1.710416418	0.29012699	0.371621654	0.239338864	0.290357105	0.344276651	0.790911045	0.761462904	0.227596798	0.822158877	0.017046708	0.096524223	0.879030712	0.915700342	0.785356152	1.137637145	0.307779787	0.48339104	0.35046518	0.116433747	0.754048356	0.070107008	2.118105715	0.047996333	0.220952043	0.212027425	0.884263714	0.628874776	0.199750652	1.570325243	0.451494081	0.276483746	0.082972045	0.292068193	0.113858399	0.311187721	0.620980813	0.316500932	0.208161877	0.234677878	0.495607599
E08000016	2011	0.434307218	0.534488967	0.564811012	0.318017346	0.152838689	0.166070485	0.557516626	1.7941356	0.28575835	0.363642564	0.236215117	0.286441824	0.331934268	0.795094189	0.749832446	0.223673831	0.806063979	0.015077205	0.096397297	0.864016004	0.903716445	0.774313977	1.128887011	0.304393876	0.469904412	0.347993197	0.11002763	0.743643401	0.066845343	2.102425206	0.047873217	0.214292322	0.206594639	0.862928242	0.633686957	0.194503821	1.475991159	0.443225252	0.270163374	0.094271744	0.287519891	0.113618101	0.292829973	0.609423363	0.313991719	0.199484914	0.221439327	0.479773334
E08000017	2011	0.426863468	0.522424347	0.555895524	0.310114235	0.15236041	0.162944381	0.55155583	1.7364926	0.27874593	0.35590653	0.232098364	0.276782148	0.326736579	0.776318594	0.73197883	0.219409355	0.786473534	0.014804901	0.094619245	0.843173265	0.886688769	0.756471285	1.10454262	0.298742031	0.460196951	0.339410361	0.107963887	0.722582085	0.067205092	2.037297323	0.046559692	0.211031569	0.201274578	0.852221322	0.61623497	0.192765605	1.425016001	0.430481723	0.268695361	0.095272074	0.282995043	0.111817555	0.289828539	0.594180978	0.305309724	0.196775194	0.220957092	0.472897827
E08000018	2011	0.426426041	0.523640395	0.558482875	0.307183414	0.155300436	0.16454702	0.561039616	1.719215454	0.278953919	0.354400463	0.232038912	0.275967306	0.329393163	0.775851251	0.726409145	0.219038868	0.781461795	0.015115835	0.093942591	0.84426956	0.888889773	0.758070501	1.104817216	0.298647578	0.461843006	0.336169506	0.10963401	0.716328534	0.069220364	2.013154235	0.046298813	0.211791177	0.203071815	0.856345209	0.613648031	0.194996485	1.421989926	0.427960967	0.270554021	0.095360896	0.280661777	0.113140619	0.296022102	0.591255623	0.301066758	0.201208057	0.22409357	0.474444143
E08000019	2011	0.400701594	0.503886485	0.530123376	0.284439213	0.152039177	0.151955608	0.543270682	1.626125288	0.261207067	0.333376425	0.212271102	0.251175908	0.321370215	0.75866033	0.682001463	0.208540664	0.732586977	0.014709655	0.097700854	0.779785874	0.848151382	0.691815147	1.036139879	0.267422672	0.436005161	0.311527417	0.107774878	0.65640353	0.070002631	1.851188708	0.045190627	0.203734659	0.185699598	0.822007681	0.572906483	0.184649796	1.310558635	0.381710396	0.257949468	0.088837135	0.260396401	0.106974077	0.282115371	0.557461648	0.288390233	0.196171542	0.215861844	0.464385363
E08000021	2011	0.382034354	0.495833307	0.51443047	0.274548321	0.145525008	0.146028347	0.528815319	1.645862694	0.256591657	0.323207788	0.207538134	0.24340595	0.313487865	0.758081811	0.670697037	0.204274414	0.719532561	0.013919445	0.094956697	0.760425597	0.831523075	0.674116405	1.020877566	0.259005162	0.427957648	0.304017866	0.103906265	0.629527113	0.068670651	1.813020783	0.044677612	0.197034094	0.181577401	0.799301322	0.568577421	0.180010605	1.237295468	0.367925364	0.254075071	0.083318682	0.254300427	0.103875841	0.272618468	0.555429825	0.290612697	0.188424298	0.208582863	0.450721393
E08000022	2011	0.456737164	0.558519687	0.588854652	0.322834341	0.162641419	0.172826729	0.586711881	1.782331626	0.293056785	0.375376512	0.241617746	0.292460687	0.349645267	0.813888595	0.771671058	0.230899739	0.834509715	0.015695378	0.099911389	0.892083419	0.934471645	0.788351716	1.160050781	0.309762737	0.487155867	0.357486212	0.116823647	0.756827539	0.071360929	2.152968931	0.049392843	0.22408921	0.211817036	0.90547163	0.649821	0.203517333	1.53620035	0.452961657	0.278955315	0.092427542	0.293855915	0.114826751	0.306664328	0.623697987	0.324714852	0.210074996	0.233806528	0.500242116
E08000023	2011	0.442961252	0.543864925	0.575888332	0.317140243	0.160250415	0.170553903	0.576279834	1.778395148	0.287436817	0.365788924	0.240188836	0.286051332	0.340074804	0.804673329	0.753735341	0.225784996	0.81017552	0.015544616	0.098991692	0.873084308	0.912730562	0.784534774	1.139055322	0.307176082	0.480547859	0.3474416	0.11361702	0.746572779	0.071600518	2.102241836	0.047607286	0.219030627	0.210561033	0.890340445	0.635220126	0.200847095	1.472576894	0.445404572	0.278736275	0.087905842	0.291970576	0.11651313	0.30598681	0.615535681	0.311746652	0.208370917	0.229542361	0.483790176
E08000024	2011	0.436344017	0.539425116	0.570144261	0.317465284	0.157062132	0.167977234	0.570044859	1.813763866	0.286830666	0.363170775	0.239486216	0.283420867	0.336303965	0.808598362	0.747868301	0.224807774	0.804831219	0.015203585	0.097771006	0.865832826	0.909045037	0.780642294	1.135400588	0.306117395	0.474568218	0.345233018	0.11179227	0.744831282	0.069991504	2.090440896	0.046996986	0.216218775	0.2102044	0.880555556	0.63614804	0.198007254	1.428697548	0.44249806	0.277656522	0.088445996	0.288447115	0.117598487	0.301634955	0.618839334	0.311198058	0.2052526	0.226564328	0.479283815
E08000025	2011	0.359869085	0.48382513	0.510846656	0.262732615	0.162736809	0.143805872	0.562647044	1.412536983	0.240673973	0.302595464	0.194956839	0.212470945	0.324635143	0.751802703	0.587504201	0.198332929	0.635419648	0.013780661	0.111921729	0.709065268	0.829300959	0.619370792	0.967108473	0.239093407	0.408301468	0.264219852	0.112686206	0.554582196	0.085430658	1.523971318	0.043177515	0.205843321	0.168045867	0.843410118	0.527599971	0.194414421	0.988011887	0.304980339	0.260663693	0.113962362	0.237060987	0.108549227	0.284572256	0.475109636	0.247090699	0.214918513	0.214455532	0.463237705
E08000026	2011	0.391230261	0.506255457	0.537515597	0.278340711	0.16715962	0.153194804	0.578499529	1.536456335	0.254901916	0.321026398	0.207914262	0.234924747	0.336261367	0.770261721	0.647044588	0.207790731	0.69632958	0.014678874	0.105593126	0.763897524	0.866727589	0.674186361	1.022236906	0.259228618	0.433189588	0.289197385	0.113226953	0.616657441	0.080690933	1.703182187	0.044220898	0.211774362	0.181631633	0.861076644	0.560515727	0.196640343	1.169139142	0.348479039	0.268231689	0.106912633	0.255167322	0.11024173	0.298305706	0.529951797	0.267944404	0.213663104	0.222491309	0.471448577
E08000027	2011	0.451244734	0.544994177	0.584310964	0.311496205	0.166935102	0.172976012	0.597114505	1.717196638	0.287049049	0.365357248	0.235469692	0.281420837	0.348996447	0.792353095	0.743404248	0.226741385	0.804361512	0.016812344	0.098297168	0.869890212	0.92106725	0.77516519	1.13429284	0.304502932	0.480642842	0.342815221	0.119053923	0.73146079	0.074829987	2.046069186	0.047682471	0.224442525	0.207659365	0.895756321	0.623746196	0.204553116	1.492855129	0.439645408	0.280268125	0.096947535	0.2889569	0.115964009	0.314507521	0.611599866	0.308166733	0.215651043	0.238471978	0.499017437
E08000028	2011	0.39322677	0.506541586	0.538551903	0.287432526	0.161089764	0.153863601	0.571911818	1.574829755	0.262680097	0.329392469	0.213733591	0.238547589	0.3299026	0.774894678	0.653228482	0.208850332	0.705223153	0.013911872	0.103521539	0.779747657	0.874249792	0.691784729	1.043114647	0.26863226	0.43426478	0.295679288	0.111480174	0.620381163	0.082095919	1.746011101	0.044945486	0.213198871	0.184629646	0.869926079	0.574261398	0.20120622	1.147485819	0.360219938	0.270081262	0.110241783	0.256294569	0.111620356	0.294714836	0.528574909	0.27349604	0.214411564	0.222969788	0.471546315
E08000029	2011	0.469880001	0.55956271	0.603787186	0.31212415	0.180550166	0.181615592	0.625183643	1.619519725	0.285233377	0.367588736	0.237196063	0.288423607	0.364796881	0.790077356	0.763041811	0.232539899	0.819245162	0.017595445	0.099931462	0.879344015	0.944075857	0.78923525	1.139143512	0.306125993	0.493847255	0.345150015	0.125234646	0.750123378	0.077981623	2.045385681	0.049286806	0.229917225	0.214407615	0.910244657	0.617190708	0.20853984	1.623906002	0.442240279	0.286471636	0.087178517	0.291570053	0.116959688	0.336366342	0.612905169	0.307038503	0.223919782	0.249902345	0.519828781
E08000030	2011	0.414574323	0.513489562	0.553765692	0.294200034	0.162786215	0.16296053	0.578423197	1.624714394	0.270546108	0.341655906	0.224438821	0.258896947	0.332123772	0.766856401	0.69373083	0.215234404	0.741981804	0.014550077	0.097366349	0.816880265	0.889387215	0.730589312	1.078129667	0.286259937	0.453460446	0.313034734	0.112403127	0.665095213	0.077641894	1.86061686	0.045366278	0.215254235	0.196993041	0.863138883	0.594327995	0.201947501	1.270971079	0.394754659	0.273213854	0.102760805	0.272988777	0.1138246	0.301188706	0.562825909	0.286831667	0.212178918	0.227917809	0.473646406
E08000031	2011	0.394713835	0.509070035	0.544540864	0.285747638	0.16759916	0.157230948	0.584781833	1.578962655	0.258145719	0.328316056	0.217037607	0.242908699	0.334883043	0.778215409	0.652119607	0.210612477	0.707183317	0.014897187	0.111180545	0.780928668	0.875860156	0.703195482	1.05001056	0.270653271	0.441772467	0.295713737	0.115516799	0.628020021	0.083557335	1.74145136	0.044858182	0.215116508	0.189429135	0.872895881	0.572777448	0.203389387	1.168153077	0.359907112	0.274767849	0.101715407	0.264361774	0.116598369	0.299987552	0.543786721	0.2698162	0.220646435	0.22812866	0.474023129
E08000032	2011	0.374689372	0.479617496	0.510536306	0.277180239	0.152318029	0.146139427	0.543374091	1.522755042	0.250831408	0.313423016	0.202268782	0.229728246	0.311521208	0.729926797	0.635425433	0.199921283	0.676896376	0.013088817	0.091008162	0.742269963	0.833975991	0.652871489	0.990663747	0.256055856	0.41073279	0.283206337	0.103685917	0.58651802	0.074726432	1.659043314	0.042519005	0.198242232	0.176642313	0.811983774	0.548556132	0.187522123	1.11530545	0.341237835	0.253972916	0.110370828	0.240631388	0.103668271	0.273602569	0.501281416	0.264027696	0.195805686	0.211878944	0.450246542
E08000033	2011	0.433820806	0.53042003	0.565194051	0.301048222	0.162345662	0.164296546	0.578499125	1.667148491	0.276389486	0.350226057	0.22420706	0.272245553	0.340735734	0.778467929	0.722135785	0.219003039	0.778520767	0.015774275	0.094381501	0.83647882	0.894167692	0.743739888	1.093320945	0.289605924	0.458348103	0.331115118	0.114955853	0.69490769	0.072451929	1.965696584	0.046416783	0.215460243	0.198596284	0.866030085	0.604269104	0.195538745	1.446563946	0.414408655	0.269246222	0.093249762	0.274761263	0.109229916	0.299957272	0.578044574	0.300037333	0.206377421	0.23009865	0.484824245
E08000034	2011	0.409973892	0.512931999	0.545634823	0.292950499	0.159008363	0.158054193	0.565340358	1.61012751	0.26613916	0.33837369	0.216547763	0.255684252	0.330234367	0.764869084	0.688883621	0.212033922	0.741038547	0.01469085	0.096789889	0.798899087	0.873560034	0.711041524	1.05636929	0.27693623	0.441751431	0.31430306	0.111214831	0.662763172	0.074012635	1.852290568	0.045097797	0.209924076	0.190183156	0.853017942	0.584083999	0.192713662	1.332216978	0.387688311	0.26430699	0.101090299	0.264473157	0.108793747	0.291225274	0.554220121	0.28687015	0.203868271	0.223091889	0.473770544
E08000035	2011	0.40631349	0.517560576	0.538887162	0.288402501	0.154655963	0.152847446	0.552127777	1.612353638	0.26473289	0.338966947	0.213886433	0.251962306	0.331865488	0.772263158	0.683130231	0.212227885	0.745339729	0.015090441	0.102996025	0.785911902	0.860435086	0.689216934	1.044829875	0.266671468	0.440766442	0.315676715	0.111448101	0.66961135	0.071378895	1.880861379	0.046327357	0.208373159	0.185814391	0.84328994	0.579079444	0.186402373	1.354731103	0.384464316	0.258293012	0.093117575	0.261585922	0.106658802	0.284126378	0.559638412	0.295012973	0.199710044	0.21673279	0.478552995
E08000036	2011	0.431122757	0.53117574	0.564097678	0.308261248	0.153798127	0.165221131	0.563342133	1.748596676	0.283894183	0.358596517	0.234377477	0.278169125	0.332721361	0.785577791	0.740197975	0.221427245	0.795467891	0.01471793	0.095530152	0.857351234	0.89761071	0.759914942	1.120661917	0.301257323	0.467450059	0.342319223	0.11024159	0.726229531	0.068829776	2.059219063	0.046986717	0.215375444	0.20320134	0.871259455	0.628252222	0.196779865	1.437954191	0.436289268	0.271087364	0.093850861	0.284383249	0.112152776	0.293551014	0.60194496	0.31047701	0.200957794	0.223624716	0.477800426
E08000037	2011	0.440633998	0.546239511	0.573831692	0.317746371	0.157425126	0.167305694	0.56965653	1.794941329	0.287367977	0.366530276	0.238126764	0.285310041	0.33996441	0.804065045	0.7519159	0.225334271	0.816493527	0.01537648	0.098095276	0.868442597	0.910614217	0.775532683	1.138023188	0.303310818	0.477666925	0.35005377	0.112688846	0.745462751	0.069533823	2.11368817	0.047654748	0.217671397	0.208880993	0.878023163	0.634853815	0.197608114	1.495750512	0.443579499	0.275213564	0.092463894	0.288419843	0.114177808	0.300443302	0.615142687	0.317590681	0.204004524	0.225571502	0.486486487
E09000001	2011	0.467280849	0.621721068	0.641978666	0.30398453	0.191613085	0.173698171	0.677229303	1.864435096	0.291958201	0.357008071	0.251653312	0.300855742	0.402579189	0.915363425	0.758103497	0.239057477	0.885579757	0.016833669	0.125106658	0.888474544	0.980018919	0.794503473	1.22034891	0.299756862	0.515697654	0.365856113	0.138319431	0.760130551	0.091115498	2.18664963	0.051230017	0.244290951	0.218815661	1.018974079	0.650739213	0.218274139	1.608482833	0.440217631	0.305735601	0.071160943	0.302945929	0.120154604	0.343850302	0.676599277	0.339755481	0.237355839	0.258810372	0.544372633
E09000002	2011	0.367285511	0.539331964	0.531172844	0.286256009	0.16244925	0.144418426	0.569894146	1.345159602	0.25657157	0.344083415	0.201687755	0.206120734	0.347100708	0.851645152	0.596473041	0.21888346	0.662408434	0.015890686	0.152609696	0.730254222	0.8889765	0.606206451	1.004671869	0.240715027	0.432546683	0.282998286	0.122785142	0.617243424	0.08792186	1.612494831	0.053122791	0.223145498	0.161211602	0.937317511	0.55593198	0.205559702	1.009492083	0.31091705	0.26538574	0.162695737	0.244132319	0.118153391	0.285906006	0.448049969	0.269681219	0.230077959	0.209806348	0.530088197
E09000003	2011	0.454934592	0.570862304	0.607020799	0.291787683	0.202473877	0.174697689	0.676018562	1.406382657	0.261287506	0.341386675	0.210050168	0.254885171	0.394142226	0.805659256	0.702010058	0.222508315	0.760111107	0.021346681	0.112894709	0.788082998	0.929032283	0.700134256	1.07671891	0.264911275	0.469358984	0.30800468	0.142258919	0.652745191	0.093134434	1.746551223	0.050122881	0.232732692	0.187829502	0.937732287	0.569303632	0.212139369	1.364374676	0.35225123	0.291239666	0.105639653	0.263468454	0.112124558	0.350404868	0.519062732	0.288106961	0.238525507	0.258332578	0.550490643
E09000004	2011	0.468400705	0.580914238	0.611349287	0.316803545	0.185922545	0.17802066	0.64102327	1.533138208	0.290875467	0.37911483	0.23472194	0.278342135	0.380682617	0.84105488	0.758027397	0.239079364	0.821515137	0.018700901	0.115459648	0.870830208	0.967720034	0.768436814	1.147399537	0.296480717	0.494908198	0.345834694	0.129168069	0.761054723	0.082196266	2.03397538	0.053913754	0.237832513	0.20615946	0.965752621	0.6248027	0.211743327	1.548974619	0.424577985	0.289354304	0.104076323	0.29055303	0.118064738	0.336829762	0.575150961	0.321275893	0.231135078	0.249834885	0.555627734
E09000005	2011	0.359894218	0.520198174	0.557839685	0.24800998	0.206660804	0.151337426	0.66322426	1.208204905	0.223656284	0.297257771	0.193770156	0.201241825	0.383655905	0.835750394	0.535794788	0.204635691	0.607555444	0.016919622	0.153295255	0.686929882	0.871748806	0.592392092	0.989089338	0.219708268	0.428409794	0.246528033	0.148063968	0.537536154	0.105788338	1.339890563	0.04461008	0.229089381	0.157169947	0.940193931	0.52075053	0.220064393	0.811445183	0.250256264	0.286573518	0.125742543	0.245005569	0.119287463	0.33766858	0.430174778	0.230498706	0.263257283	0.242990803	0.526628559
E09000006	2011	0.497914911	0.605962757	0.645990575	0.319395617	0.204643793	0.187144047	0.685179519	1.515828762	0.289153813	0.379453415	0.236787724	0.289414816	0.405353363	0.846147808	0.777405534	0.241945518	0.848755799	0.022172306	0.116504376	0.884376781	0.990213573	0.790128554	1.164355291	0.30280295	0.514787927	0.351861302	0.139101838	0.771259576	0.087621972	2.057337414	0.0554157	0.246138101	0.213236312	0.997974263	0.619513133	0.218217118	1.679625481	0.428909753	0.302287714	0.099666801	0.296257979	0.119900175	0.372605551	0.599838677	0.319696466	0.240556483	0.269228807	0.574962929
E09000007	2011	0.434186269	0.592423804	0.622443104	0.285258679	0.200430852	0.163972011	0.661723865	1.434962594	0.253081214	0.328388436	0.207833836	0.259990704	0.410232274	0.844372989	0.696327965	0.223853457	0.767463683	0.018547911	0.1317995	0.763877356	0.895391008	0.668537493	1.070958124	0.248594267	0.479889011	0.301802684	0.138132147	0.655470178	0.091184764	1.788918689	0.048639683	0.233053155	0.183910484	0.925753365	0.567136434	0.199039461	1.447603078	0.33992807	0.289541979	0.089697855	0.260430787	0.11040938	0.344035985	0.528569148	0.291773276	0.231994375	0.248003239	0.545402614
E09000008	2011	0.41171503	0.565945912	0.588225517	0.283268314	0.192843575	0.162988036	0.649177183	1.371203673	0.262325139	0.344285574	0.212202251	0.231938497	0.38705086	0.861572223	0.644538408	0.22466896	0.714363269	0.018246754	0.142622499	0.772666961	0.924269993	0.671856675	1.06007615	0.259813621	0.456855675	0.300491071	0.137493768	0.668907474	0.095409738	1.708364851	0.052779228	0.237107602	0.179837137	0.989906807	0.573214766	0.214045069	1.207630596	0.3382016	0.287010401	0.128138361	0.26857416	0.119094185	0.338513325	0.501034198	0.280612412	0.242886512	0.24044766	0.545930379
E09000009	2011	0.410818947	0.555183225	0.59185009	0.2751094	0.208847992	0.164947365	0.680749464	1.331556655	0.241989266	0.319017849	0.199837646	0.229992688	0.39982849	0.837869223	0.630060823	0.216268968	0.689149899	0.01875639	0.130579013	0.731779652	0.908351846	0.644854468	1.035587636	0.241467377	0.446706565	0.282621891	0.149674719	0.603559361	0.10071535	1.551894344	0.048397199	0.235763093	0.174072474	0.959119295	0.550039286	0.213567196	1.096231348	0.29845909	0.292024794	0.124135043	0.250678712	0.113800153	0.349350797	0.472226631	0.260886741	0.252200952	0.251432205	0.543732646
E09000010	2011	0.401314031	0.554808481	0.572145211	0.283922803	0.182253567	0.159003928	0.624656919	1.364471739	0.261759149	0.347440327	0.21215048	0.23077957	0.37239763	0.848173098	0.636934966	0.223891935	0.705564439	0.0174998	0.142992264	0.766836573	0.915371644	0.662689103	1.052161421	0.256745114	0.452907945	0.297962123	0.132536845	0.662916403	0.09275659	1.702206868	0.051543323	0.232922117	0.177952395	0.963349393	0.573433946	0.210822971	1.165246331	0.337719218	0.280625002	0.127444493	0.266012681	0.119456715	0.320083868	0.487151933	0.283764462	0.239075541	0.23230971	0.542089473
E09000011	2011	0.400101414	0.560624324	0.573423402	0.289209895	0.177128569	0.153382188	0.61221594	1.417174231	0.262405543	0.346901716	0.208457457	0.229527992	0.373071708	0.865364955	0.642384876	0.225724285	0.719439356	0.016963003	0.145384729	0.756263299	0.902284271	0.643311175	1.046478106	0.248825873	0.45131465	0.30256636	0.125979822	0.660391414	0.089860417	1.732456371	0.052614586	0.230560436	0.174451399	0.948644726	0.570008862	0.204805642	1.235419494	0.333226593	0.275003287	0.130110308	0.255486772	0.115510362	0.307854945	0.493005149	0.290269389	0.228867961	0.227195785	0.548345569
E09000012	2011	0.368735822	0.550821722	0.555040138	0.257875647	0.178372664	0.138649356	0.602041201	1.302562682	0.237946815	0.318787932	0.187371478	0.206748548	0.380139269	0.860411126	0.57275631	0.218446085	0.662148968	0.017342124	0.150422439	0.677043142	0.831918377	0.560660229	0.976797922	0.213445344	0.429381667	0.268869294	0.127935174	0.608050238	0.096402611	1.533011558	0.049625989	0.220061675	0.152891861	0.922472115	0.52319466	0.19521439	1.076394647	0.280074318	0.261769412	0.122473281	0.232849559	0.107099874	0.291793324	0.444045015	0.269569028	0.226705275	0.215825616	0.539633479
E09000013	2011	0.431273874	0.605773893	0.617533698	0.285107795	0.189061025	0.157488175	0.647499433	1.516793399	0.258206862	0.341606195	0.207390485	0.251112386	0.407664564	0.853080765	0.692245895	0.226168207	0.783444926	0.018509273	0.133290674	0.758203363	0.89189129	0.654545351	1.069636604	0.242516656	0.475578289	0.311414495	0.136738014	0.670666604	0.0912142	1.83066174	0.050037044	0.230534451	0.180918043	0.941779538	0.572780837	0.19448044	1.501412833	0.344461169	0.280136366	0.089827522	0.256858307	0.105803144	0.323700876	0.538544654	0.311669866	0.224834571	0.238271888	0.556931232
E09000014	2011	0.384642409	0.565783718	0.570942871	0.272768463	0.180204481	0.148227871	0.612506154	1.392442292	0.254625298	0.329782389	0.20235879	0.226061046	0.379693309	0.866726315	0.613047606	0.220951757	0.703736087	0.016987643	0.143707018	0.736070228	0.877662032	0.619660679	1.036933761	0.237281438	0.444366377	0.291327679	0.128572371	0.633016248	0.095247925	1.667336111	0.049404692	0.22712477	0.169261096	0.945395759	0.56152513	0.202575461	1.134737534	0.314504788	0.276913726	0.117870642	0.250001673	0.113693004	0.308425338	0.484422956	0.283462922	0.231720174	0.228023254	0.541309486
E09000015	2011	0.450424413	0.566316719	0.618130495	0.272986424	0.23853615	0.187634858	0.74533448	1.29569659	0.239395751	0.313977214	0.198978116	0.234257957	0.426781409	0.800271292	0.676240138	0.214854379	0.695432328	0.021238748	0.118484165	0.74921623	0.943543207	0.70167894	1.055150786	0.255261807	0.452464945	0.271290658	0.16458826	0.589690648	0.105030275	1.506439076	0.047856051	0.242480266	0.183321114	0.972644643	0.550930952	0.228932261	1.128210208	0.30303696	0.306020772	0.117508007	0.258077458	0.115248817	0.396248848	0.463468072	0.251271798	0.263467957	0.268024228	0.53513968
E09000016	2011	0.489297517	0.592630145	0.630297523	0.325821618	0.194047406	0.185034083	0.659200117	1.573638776	0.294008511	0.388591227	0.242423671	0.291389968	0.391527267	0.846689992	0.781616538	0.244123179	0.847540872	0.021227869	0.116293442	0.897004426	0.98503997	0.7968113	1.172954848	0.308108738	0.511585724	0.35766609	0.134083914	0.791262963	0.083023479	2.109127959	0.053896793	0.24366039	0.214407975	0.983845138	0.634572014	0.215587854	1.637831783	0.446998515	0.297602743	0.101665151	0.30191459	0.12062889	0.35333141	0.599602443	0.325458987	0.2374733	0.261516886	0.562710305
E09000017	2011	0.43955779	0.565203008	0.595407887	0.301340082	0.200683546	0.173042282	0.664815881	1.444233031	0.26241201	0.338537108	0.209996955	0.24744405	0.38942075	0.82225014	0.701687086	0.225482018	0.740622674	0.017726099	0.114263452	0.792475568	0.941844966	0.702906897	1.073158673	0.264597026	0.461512523	0.302584429	0.139366163	0.653341417	0.090405279	1.746794246	0.049294432	0.234582298	0.187571135	0.953729068	0.584702691	0.211293331	1.305792727	0.350675885	0.289814449	0.120753723	0.259617165	0.112022842	0.35133084	0.510232612	0.283261467	0.236106833	0.24802445	0.536486803
E09000018	2011	0.42783118	0.561840171	0.599821614	0.282607578	0.210600563	0.169191133	0.685884058	1.389286298	0.245868021	0.324041456	0.199086551	0.240930632	0.40607895	0.821563026	0.667055253	0.21585093	0.713109161	0.018415445	0.116603688	0.752171452	0.924505294	0.656244502	1.046086402	0.248150776	0.450758589	0.28879023	0.145120258	0.609450651	0.098690058	1.607350692	0.046695579	0.235740463	0.179266532	0.955702939	0.562038024	0.213905561	1.166677742	0.313016801	0.291359234	0.129996636	0.25509213	0.108744067	0.353376237	0.474648135	0.266823221	0.24549143	0.252736318	0.535470102
E09000019	2011	0.42273551	0.600261375	0.624720886	0.279096733	0.202808165	0.159011045	0.666300897	1.452299922	0.245462335	0.324054539	0.200514861	0.25138599	0.420266349	0.860239379	0.694627645	0.224328494	0.761518556	0.020329795	0.138943815	0.740736336	0.880539294	0.632408148	1.0511228	0.235866956	0.471608526	0.299293247	0.140604384	0.656264448	0.093101722	1.761415059	0.048475184	0.234863207	0.176883711	0.938346571	0.56078496	0.193596046	1.462730829	0.325984463	0.283227049	0.090180683	0.253926133	0.104425365	0.334507664	0.499455483	0.2919736	0.23105025	0.246296159	0.553263259
E09000020	2011	0.460569422	0.628233871	0.666464134	0.293126088	0.215022154	0.179571625	0.695576626	1.540937526	0.259218787	0.342836366	0.218303457	0.27530207	0.42667808	0.827626356	0.733042144	0.227547871	0.812173403	0.024140962	0.13810101	0.785310942	0.915245105	0.698535851	1.101214548	0.260466457	0.514426534	0.31444401	0.153601175	0.680185083	0.096279026	1.859631494	0.048875453	0.243323038	0.194479186	0.940735065	0.566254861	0.202694869	1.768743151	0.362775872	0.293396356	0.077174815	0.278640327	0.115086919	0.370680019	0.566785958	0.293105735	0.240573528	0.264676032	0.569361912
E09000021	2011	0.461899816	0.592645001	0.621166234	0.305385792	0.198257631	0.175969655	0.667461544	1.491845343	0.270046267	0.349104853	0.216663139	0.269412193	0.399330368	0.831629837	0.748084503	0.23431815	0.79820565	0.018249997	0.114041996	0.819775164	0.95881998	0.721888887	1.107910762	0.271006725	0.487884792	0.321558442	0.139589421	0.68971288	0.088880385	1.879018442	0.05072025	0.236003933	0.197084505	0.935876624	0.601489512	0.208240736	1.516446856	0.376325759	0.292501512	0.101412673	0.267714884	0.112520515	0.347433865	0.54701647	0.303383176	0.232951358	0.253895756	0.556765784
E09000022	2011	0.39267677	0.589310118	0.586942817	0.275941169	0.179658444	0.144966804	0.615913876	1.464394585	0.2538604	0.340515146	0.201187708	0.226977489	0.396045308	0.894194818	0.633563584	0.234165204	0.734019338	0.017756933	0.154264855	0.732671126	0.8751413	0.608682012	1.042150899	0.230021781	0.453224652	0.301359252	0.127659775	0.658845155	0.094710994	1.756623111	0.051552327	0.231463813	0.169427914	0.950121157	0.567599953	0.195050428	1.315579817	0.323085728	0.268502739	0.11496486	0.246627584	0.107775318	0.293515718	0.489755545	0.30612415	0.223105699	0.223775505	0.556000608
E09000023	2011	0.386137486	0.57840029	0.576877234	0.281591409	0.176651781	0.148031319	0.605663285	1.367978066	0.259117222	0.349660608	0.20809143	0.219635452	0.3810295	0.892372461	0.608386208	0.22852617	0.707767226	0.018146596	0.158502634	0.743367019	0.893494592	0.615219536	1.04068664	0.238361579	0.454011134	0.29828759	0.132069235	0.660778715	0.097589689	1.709840924	0.051763604	0.231994337	0.167798433	0.97942089	0.568608671	0.206654106	1.18247547	0.321262238	0.271096656	0.134811527	0.25496932	0.117487391	0.303250335	0.484696276	0.295450272	0.235329109	0.223287856	0.558469503
E09000024	2011	0.441983421	0.597118736	0.618658568	0.293995355	0.200362608	0.169225867	0.674403252	1.414245747	0.260943291	0.347227763	0.211807052	0.250540211	0.404739945	0.847919739	0.68857057	0.228587141	0.758541752	0.020228736	0.130755243	0.77741628	0.933641143	0.676904794	1.079937525	0.257429506	0.478853066	0.312415893	0.145427454	0.672348212	0.095645284	1.764678163	0.051546589	0.237562111	0.182781557	0.968950079	0.572653674	0.212149164	1.404871806	0.344316364	0.287712756	0.116409409	0.266296485	0.11394586	0.343901076	0.514109088	0.293777455	0.240910338	0.250949167	0.568240688
E09000025	2011	0.313120381	0.489451281	0.507043284	0.230851541	0.190641736	0.133448281	0.608971847	1.131628781	0.2043643	0.267844637	0.170803422	0.174240228	0.352610374	0.796026493	0.472081132	0.195015996	0.531443233	0.013526461	0.141582379	0.615330129	0.811206468	0.495037473	0.903257236	0.190788886	0.392165276	0.210735173	0.126010134	0.436449287	0.105725999	1.114772821	0.039448494	0.209184488	0.137434843	0.872822976	0.48784517	0.209105219	0.571702309	0.196570038	0.266741534	0.14222625	0.214090545	0.107682773	0.305256321	0.36225604	0.205354983	0.245976301	0.220575123	0.493819281
E09000026	2011	0.400980159	0.533216235	0.575288778	0.272638077	0.216330839	0.171014262	0.690526036	1.232204026	0.233379803	0.300796681	0.193578618	0.217341083	0.394627828	0.792285803	0.613737239	0.209338404	0.64175495	0.017336467	0.119887372	0.714542059	0.906300315	0.634017904	1.002152603	0.238492706	0.43143417	0.252398646	0.149611753	0.546919217	0.100386709	1.405105814	0.045889346	0.229845746	0.171831613	0.932242809	0.537438309	0.220384823	0.956285037	0.271931554	0.292696476	0.121029304	0.236971477	0.113179958	0.36310535	0.437240647	0.242634226	0.254708139	0.247412818	0.52326643
E09000027	2011	0.512793401	0.635350231	0.666411405	0.323460419	0.204087622	0.186867068	0.693602202	1.534658717	0.288539482	0.381782759	0.229078635	0.297819938	0.417159325	0.834313332	0.799115792	0.246894291	0.891052237	0.022263368	0.112928399	0.879390676	0.987219597	0.77947685	1.168124865	0.292724197	0.524845536	0.361567988	0.143985085	0.756328929	0.087437424	2.096456224	0.055987121	0.247825787	0.21148026	0.976130491	0.615972715	0.211195265	1.895914994	0.421394244	0.296688281	0.088390562	0.289746521	0.11145182	0.362818012	0.59248603	0.334602275	0.232513601	0.275907582	0.599588526
E09000028	2011	0.377251079	0.569641186	0.57880407	0.265019118	0.183828975	0.146447089	0.617283109	1.310624834	0.243915004	0.329334376	0.201147461	0.215049652	0.39371348	0.880090372	0.588391377	0.22829034	0.688213609	0.018326583	0.157547962	0.707561741	0.863554632	0.586306226	1.013578609	0.223029285	0.44470375	0.279615151	0.131056909	0.627585791	0.100574689	1.60218775	0.048660609	0.228469727	0.161233259	0.94024318	0.54831579	0.201197009	1.151601308	0.297426921	0.271032536	0.118638969	0.244875263	0.11341694	0.307108258	0.46227443	0.28046788	0.232836025	0.224086059	0.55166474
E09000029	2011	0.475475614	0.598284267	0.627194667	0.31800534	0.193970343	0.178182754	0.662714328	1.559641831	0.290389172	0.376033819	0.230725801	0.278242422	0.397003968	0.859977013	0.76262489	0.239114601	0.828960097	0.019683418	0.117856452	0.871365403	0.984185382	0.762124731	1.154648378	0.292560074	0.496099796	0.3485581	0.135667539	0.746107816	0.086293061	2.023194592	0.053795768	0.241486354	0.203416751	0.985200917	0.628273628	0.214412526	1.549017564	0.413106883	0.294666903	0.113984741	0.286802501	0.117273	0.344522185	0.572062906	0.321556411	0.23571404	0.257332109	0.568375282
E09000030	2011	0.363344496	0.514380031	0.555544531	0.250475599	0.201780891	0.145998357	0.654167047	1.225527831	0.205663002	0.262786969	0.170373891	0.21918137	0.398749615	0.827843382	0.613861606	0.197333055	0.620819517	0.01731102	0.120461759	0.628516365	0.810916848	0.517095073	0.933428554	0.196579472	0.414969022	0.244162767	0.140391832	0.508397923	0.095929236	1.301621013	0.037966131	0.216535875	0.147913832	0.85810372	0.508279551	0.188418268	0.892550172	0.225929181	0.281864975	0.119789734	0.222271655	0.097370197	0.310627924	0.389495062	0.224735045	0.236649167	0.237772853	0.505423939
E09000031	2011	0.394456413	0.553927438	0.573436722	0.276775939	0.190918457	0.155734615	0.640504449	1.350904484	0.243471516	0.325456035	0.200214629	0.224994381	0.381855734	0.835891582	0.616147575	0.21688007	0.683564416	0.017835266	0.129860025	0.723893431	0.892442249	0.623873787	1.021762124	0.237557474	0.443778025	0.283133956	0.1364357	0.60211079	0.099224469	1.569997754	0.048874785	0.227077929	0.169488392	0.93955252	0.549054245	0.209965207	1.085899408	0.300631334	0.278719872	0.133479943	0.24857182	0.113549052	0.321265203	0.460316687	0.266444727	0.240734078	0.237957056	0.535366411
E09000032	2011	0.459806446	0.635500547	0.650543217	0.29551332	0.20437575	0.163884253	0.688357101	1.506192647	0.260777568	0.346700892	0.20278761	0.260609973	0.436015234	0.860676647	0.738983278	0.235420751	0.817261224	0.018937393	0.135022974	0.77628888	0.917827479	0.663067366	1.088450394	0.245333704	0.489787128	0.31918424	0.146917807	0.691131523	0.092780719	1.902713283	0.052141431	0.243435778	0.183429203	0.973643189	0.582821687	0.196526239	1.660719935	0.352187234	0.285791248	0.100998489	0.260701804	0.101470646	0.339147017	0.527932417	0.320210833	0.229876103	0.249157234	0.577821571
E09000033	2011	0.455338005	0.613048895	0.668883397	0.277321383	0.226823968	0.176853686	0.728326207	1.365248459	0.238339798	0.306119729	0.204024264	0.267459253	0.449498954	0.818184274	0.730122908	0.21552886	0.768731982	0.020227038	0.126304702	0.736605984	0.891656287	0.657860961	1.061155463	0.244121366	0.514120422	0.284560609	0.15667055	0.614822189	0.097245041	1.673567972	0.045366238	0.238671533	0.182760737	0.923901021	0.542851823	0.204278821	1.51635013	0.323280469	0.301456961	0.080577453	0.265766913	0.109559953	0.3956358	0.510191434	0.264998743	0.247358986	0.274701326	0.548133352
S12000005	2011	0.482000179	0.554064328	0.606719177	0.330186258	0.172209783	0.184882267	0.605566258	1.781463623	0.299661599	0.38212292	0.251147209	0.309576021	0.356626461	0.802281142	0.78672526	0.232320822	0.851601259	0.017524583	0.097873337	0.913939979	0.943639106	0.825885608	1.17461193	0.325357513	0.501865433	0.36162351	0.121527067	0.791927186	0.072406303	2.201985857	0.04776889	0.229157146	0.222158545	0.917876343	0.646813548	0.208992473	1.640892843	0.478752676	0.287475631	0.084908049	0.305966666	0.120746083	0.337441496	0.662379111	0.32042285	0.221504223	0.246409814	0.497477489
S12000006	2011	0.424257398	0.542191823	0.560506313	0.315279057	0.158332463	0.161832406	0.558451156	1.870565659	0.279665677	0.364791265	0.23544882	0.275875072	0.332725277	0.792596028	0.741534417	0.220808278	0.803455903	0.015617658	0.097247004	0.83926666	0.883087724	0.761415008	1.116955823	0.294936762	0.470665472	0.346011139	0.107952815	0.730139816	0.069626056	2.08006778	0.04838197	0.210573694	0.210189114	0.851245314	0.615017024	0.190265376	1.512522076	0.425275396	0.273119721	0.087374324	0.288347143	0.114630878	0.285586586	0.627668411	0.311320528	0.196402538	0.221427904	0.476935184
S12000008	2011	0.477933109	0.564629528	0.605827403	0.325175716	0.168373307	0.183469126	0.603066663	1.766295912	0.302637902	0.38762619	0.25147937	0.306857188	0.355853917	0.812664858	0.80012964	0.238344048	0.858291712	0.017180785	0.098159241	0.925150535	0.958252416	0.827782224	1.191359256	0.326121157	0.504631882	0.369171748	0.120531714	0.797800481	0.070901781	2.210857469	0.050288382	0.230445127	0.221740892	0.921964307	0.658536394	0.207928045	1.667845791	0.482671025	0.287870796	0.081142241	0.3070967	0.119394702	0.325625448	0.651023788	0.329048432	0.216553844	0.245205787	0.518949488
S12000010	2011	0.479653716	0.569482551	0.604803154	0.330246733	0.171009912	0.181171043	0.607297704	1.765336664	0.303702175	0.391254843	0.245168958	0.301908799	0.359647726	0.821930327	0.79584019	0.240162199	0.861714744	0.018698904	0.099544386	0.921175978	0.962830045	0.811300569	1.182144545	0.318583664	0.500760223	0.368707135	0.121823783	0.788675831	0.070543611	2.196811074	0.051517096	0.229794605	0.216851636	0.923565576	0.654385474	0.205063521	1.698848446	0.469943086	0.282691574	0.089405166	0.298920203	0.117336748	0.319413146	0.642830101	0.330469692	0.21590359	0.248946682	0.536167182
S12000011	2011	0.431120182	0.550951186	0.565357432	0.291443798	0.166150846	0.15672539	0.57912381	1.628095994	0.267407289	0.346887713	0.216569637	0.264378446	0.354625777	0.773963445	0.714838968	0.219474342	0.787126141	0.01639372	0.101036794	0.796700222	0.865346459	0.705667105	1.062350444	0.266879857	0.457716422	0.329087327	0.11592631	0.698309162	0.07262439	1.965408069	0.048117831	0.212320147	0.195375894	0.8619638	0.582212729	0.183429516	1.610958423	0.396275108	0.266242453	0.074009317	0.264663055	0.103471245	0.29569237	0.59297552	0.312196935	0.199929241	0.227552274	0.493948224
S12000013	2011	0.478645081	0.560102143	0.601691992	0.324100008	0.170747255	0.185749067	0.599332666	1.822163313	0.295567401	0.385566324	0.255327609	0.311075954	0.352700859	0.792161799	0.788490187	0.235838226	0.855951407	0.018318276	0.096528841	0.911169836	0.935758064	0.838895832	1.185117309	0.327751877	0.506500433	0.364501221	0.119895555	0.7949941	0.072275499	2.213352765	0.048468861	0.227453391	0.228636468	0.895574334	0.646354338	0.208279637	1.67522943	0.485149135	0.291110286	0.069691127	0.313038052	0.120599407	0.332947263	0.668328761	0.324381275	0.215325334	0.246707227	0.502272601
S12000014	2011	0.46214891	0.567770996	0.596679959	0.324911518	0.163728638	0.172165324	0.594863663	1.8305071	0.297227016	0.377420989	0.241211607	0.295979164	0.356645349	0.829586311	0.777508873	0.234454344	0.844750711	0.015886296	0.100583368	0.895326212	0.941016374	0.788551895	1.166547057	0.308671615	0.487023714	0.36314102	0.118642504	0.764047549	0.071001392	2.175576876	0.050237923	0.227059629	0.210707149	0.910610452	0.654082225	0.201552973	1.630729639	0.455663847	0.280099965	0.091643845	0.29356524	0.114478458	0.308322273	0.632477971	0.328639082	0.210099369	0.236086642	0.513032972
S12000015	2011	0.464692902	0.563383137	0.597267677	0.327898472	0.163750487	0.175000812	0.591660563	1.853357307	0.29822974	0.381171831	0.245954111	0.298311379	0.353145526	0.822931467	0.784828933	0.233954958	0.848227594	0.01626961	0.099069251	0.902677501	0.939961127	0.803537173	1.175435983	0.316125653	0.493245271	0.365504884	0.117602011	0.779028267	0.070142139	2.196230324	0.049446298	0.225693742	0.216197061	0.90624497	0.65463138	0.202277731	1.636626694	0.466058774	0.282101261	0.093600266	0.300306071	0.116255803	0.311912398	0.645416803	0.327763472	0.209690868	0.236370803	0.505330017
S12000017	2011	0.481280046	0.569390957	0.609305682	0.324581894	0.169833842	0.180373879	0.609078375	1.783345077	0.301123154	0.386780021	0.247856134	0.304770053	0.362305729	0.810746712	0.789186188	0.234434206	0.857767659	0.019014229	0.099746417	0.913534805	0.947349155	0.808538701	1.180037358	0.319090174	0.498799579	0.370219783	0.122915645	0.783765462	0.07203474	2.197202346	0.049067059	0.230201983	0.218877888	0.919476534	0.649719773	0.206760904	1.704617519	0.47382878	0.286033159	0.085070041	0.302315768	0.115721989	0.322286299	0.655093328	0.328835083	0.21682062	0.248831095	0.515053945
S12000018	2011	0.460160899	0.562280751	0.596713629	0.326808191	0.162215792	0.175534456	0.585963087	1.890264072	0.300147054	0.380402381	0.251573462	0.300455416	0.349047671	0.831812686	0.791633203	0.234659701	0.849582766	0.016181607	0.099300094	0.912420332	0.939059361	0.815974991	1.188078391	0.321522872	0.495731334	0.367664412	0.116969857	0.777659653	0.069943081	2.226110315	0.049816131	0.225476038	0.220492316	0.907843516	0.666975337	0.204644707	1.561300348	0.468900375	0.286191991	0.082861001	0.304238503	0.118941952	0.30897762	0.642451901	0.329906387	0.209156965	0.233993031	0.49841047
S12000019	2011	0.468908988	0.566625326	0.598479241	0.323868991	0.164052837	0.175505692	0.596508388	1.811981314	0.298885543	0.382269732	0.241289704	0.298789488	0.355749078	0.817287816	0.783284751	0.234282148	0.847917214	0.017290473	0.099601589	0.90082311	0.938189989	0.791505922	1.168652284	0.312375079	0.488689725	0.366754593	0.119281388	0.774605296	0.069540016	2.183498265	0.049741495	0.226364044	0.212873898	0.913811667	0.653822787	0.201390355	1.668970294	0.464896613	0.278763286	0.089554633	0.296148877	0.113493674	0.308535237	0.641115878	0.328974211	0.210499606	0.241139483	0.515953783
S12000020	2011	0.471290256	0.563019148	0.600047451	0.326127906	0.166478029	0.179555886	0.601041705	1.808902916	0.29772344	0.382738124	0.246256708	0.302486449	0.352559565	0.80576486	0.794167897	0.238050727	0.848786705	0.017497604	0.099535575	0.911416936	0.944063522	0.804118722	1.179711232	0.318695748	0.495788902	0.36593158	0.118460412	0.775040743	0.070494767	2.191415157	0.050223356	0.228358145	0.215546917	0.914471694	0.653989123	0.206776644	1.692137434	0.467352973	0.281848692	0.090649009	0.301108124	0.114696834	0.31289728	0.646154078	0.32928827	0.212710622	0.243911132	0.513437945
S12000021	2011	0.466149017	0.563522952	0.598306195	0.331415898	0.165740169	0.178813848	0.592170476	1.85025594	0.299276486	0.383325779	0.252431274	0.303569454	0.352103356	0.825121176	0.787556225	0.234936743	0.849938981	0.016503418	0.099349215	0.909424442	0.942888704	0.820660184	1.179824742	0.323631893	0.499270961	0.366854902	0.118443433	0.791052468	0.071278172	2.212996342	0.049657602	0.225058992	0.221640147	0.911585174	0.65797395	0.204606407	1.595551623	0.472410528	0.286905012	0.085273828	0.303970274	0.121872668	0.321191831	0.650467226	0.324925542	0.213646667	0.239015654	0.501586417
S12000023	2011	0.476066	0.569989797	0.612465843	0.323326732	0.172758227	0.181828714	0.611855581	1.742411857	0.299611554	0.386544394	0.25277256	0.307391432	0.357243494	0.801252516	0.798163579	0.237113582	0.858640625	0.020388436	0.098747674	0.923903312	0.948159721	0.815145894	1.186181835	0.323779972	0.496831271	0.36666584	0.118846644	0.786954383	0.072838732	2.200822305	0.049864655	0.231161778	0.22246772	0.919647079	0.650692498	0.210233618	1.712317836	0.475591964	0.288498444	0.084525735	0.302580968	0.116802504	0.324412575	0.678528099	0.332527956	0.219328531	0.253288508	0.514613461
S12000024	2011	0.488557471	0.57274203	0.616639441	0.330490257	0.173706188	0.185772323	0.617952313	1.781957569	0.303681889	0.392503589	0.253683887	0.307685248	0.36486967	0.817839268	0.798899943	0.23830653	0.864987462	0.019049097	0.100183513	0.92881404	0.959487464	0.829101378	1.195840878	0.32659421	0.509338264	0.371169732	0.123574153	0.798774085	0.073207027	2.221063041	0.049720307	0.233458013	0.224745727	0.925200553	0.654652366	0.211049234	1.70225547	0.483064012	0.291392844	0.084345896	0.309713253	0.120143192	0.333110712	0.671026847	0.327264909	0.22267344	0.251791583	0.518692703
S12000026	2011	0.488583446	0.568853102	0.615798659	0.32892748	0.173560742	0.187691424	0.616155592	1.775870408	0.303657469	0.392734132	0.257183372	0.313283917	0.360307342	0.804615244	0.797360193	0.238509875	0.867873278	0.019503104	0.098526727	0.932693417	0.956892497	0.837404407	1.197351342	0.331023819	0.512087439	0.371154018	0.12306417	0.800773221	0.073216319	2.233810989	0.049120255	0.232298481	0.22736091	0.926790306	0.655377161	0.212888198	1.702163694	0.485602292	0.292158543	0.077150074	0.312838525	0.121771997	0.333710907	0.678753094	0.327501701	0.221804319	0.253463159	0.517008075
S12000027	2011	0.462276995	0.548721647	0.586148091	0.301618929	0.165002813	0.168676187	0.586754712	1.643057091	0.286605857	0.366122033	0.23066991	0.287133999	0.354099081	0.782883091	0.772388521	0.230258188	0.825656213	0.019152371	0.099746272	0.865430096	0.913108195	0.757174471	1.126909158	0.294784414	0.474813969	0.358528784	0.115365253	0.747220459	0.06755911	2.087359173	0.049477393	0.220326095	0.200981845	0.886364051	0.616497161	0.193802799	1.734018849	0.44775865	0.27073937	0.077549118	0.280335016	0.105827868	0.30838877	0.612141498	0.321613266	0.205062658	0.243418809	0.512933015
S12000028	2011	0.488021942	0.572028044	0.619286561	0.33519995	0.176739223	0.187185921	0.617713302	1.78526527	0.302139463	0.392552061	0.258994391	0.311544801	0.365328108	0.815371372	0.801197912	0.2384844	0.871407629	0.018478229	0.099494709	0.928544545	0.961841377	0.846645093	1.199436803	0.331829502	0.516611125	0.371363732	0.122932906	0.817523966	0.073296955	2.240052572	0.050130401	0.231844061	0.230386977	0.928385817	0.653097726	0.210916317	1.713218084	0.487062042	0.296362798	0.082950184	0.315306973	0.124315424	0.342346872	0.674661096	0.325492934	0.223406758	0.250708602	0.513359283
S12000029	2011	0.472974836	0.574841854	0.605823183	0.327374071	0.168163807	0.175774349	0.604856649	1.832118688	0.301146986	0.383698211	0.244541826	0.300569085	0.363155973	0.832687042	0.792445281	0.236907198	0.858839512	0.016658678	0.101553303	0.908502978	0.952391708	0.801456122	1.177514185	0.313390058	0.495827142	0.368129765	0.121323027	0.783115238	0.071584701	2.206443786	0.050567506	0.229052987	0.214462694	0.924750496	0.658897814	0.203328785	1.680371446	0.464626087	0.283300909	0.088672771	0.29796295	0.115583448	0.315968116	0.641643802	0.332380291	0.214211291	0.242907032	0.519212523
S12000030	2011	0.467458557	0.564541778	0.599140142	0.316904813	0.171761541	0.177450534	0.606876701	1.735214545	0.294807878	0.3774589	0.240228435	0.292650186	0.359509475	0.813292317	0.774570203	0.232650799	0.838669751	0.017859823	0.100675954	0.88788347	0.940732688	0.793492303	1.154866872	0.308545043	0.492939516	0.356112878	0.12117985	0.773867169	0.072963876	2.126705265	0.049843392	0.226948598	0.215161527	0.912246083	0.632929613	0.201973807	1.667503178	0.453979416	0.283673164	0.08161713	0.295436221	0.117303475	0.323099887	0.640729263	0.321378147	0.216466776	0.245409361	0.518830695
S12000033	2011	0.441238521	0.563449723	0.584026546	0.310083643	0.164251882	0.161466466	0.588649252	1.822787878	0.281008999	0.359475758	0.227757855	0.275037915	0.358824549	0.829869101	0.752244038	0.226690624	0.814416514	0.01555814	0.107140433	0.843153406	0.910938849	0.740651483	1.122781336	0.283982868	0.474688393	0.345795479	0.117850541	0.731617839	0.073023982	2.076260263	0.049269781	0.222390403	0.200799454	0.903664773	0.623541036	0.192674184	1.609002787	0.423018869	0.274743041	0.093466034	0.278630269	0.108707272	0.303408513	0.620414748	0.323162366	0.206381678	0.229952395	0.503510285
S12000034	2011	0.475365508	0.574309496	0.607869113	0.324903405	0.169282127	0.177022635	0.608070674	1.734176758	0.298088901	0.385434259	0.240096981	0.300167743	0.363622279	0.810895169	0.795871842	0.237342535	0.862266052	0.018534161	0.100363556	0.902292578	0.953075366	0.792004175	1.171868145	0.310963653	0.493983014	0.371072689	0.121955483	0.78432055	0.07075687	2.172906666	0.050998266	0.228938306	0.212107806	0.921332405	0.643829604	0.201538116	1.803163791	0.461388128	0.280164456	0.0935295	0.296216772	0.111302143	0.314686994	0.638105389	0.335427755	0.211622775	0.247174208	0.534978456
S12000035	2011	0.500483644	0.574569257	0.625429445	0.332196219	0.179482368	0.190862219	0.626157273	1.791893559	0.304690273	0.39477432	0.260244356	0.314932831	0.368607509	0.813112095	0.803717639	0.23982146	0.875355949	0.019548123	0.100424089	0.93893233	0.961215979	0.852529684	1.205531044	0.335935127	0.520323805	0.374754698	0.127094633	0.815036596	0.075004589	2.25312967	0.049133869	0.235516132	0.23129746	0.935647795	0.654495859	0.213897857	1.742364987	0.495228507	0.298416865	0.078122373	0.319442445	0.124569126	0.347200599	0.67975303	0.325003013	0.22811534	0.256323842	0.512877244
S12000036	2011	0.480686642	0.581568135	0.620778175	0.324843687	0.175619954	0.180212696	0.626536442	1.802446594	0.296810043	0.380039757	0.245359236	0.30583402	0.375469827	0.83648434	0.803442188	0.237968071	0.865582504	0.017055206	0.104014769	0.910614287	0.966388063	0.809695807	1.187954392	0.315287691	0.503583218	0.368070482	0.125560586	0.780161557	0.074573286	2.19889447	0.051175209	0.234490035	0.215920137	0.938146952	0.657180895	0.208153229	1.744922514	0.463810671	0.288603439	0.087530741	0.299138632	0.116200305	0.332621223	0.646526563	0.335491788	0.22134565	0.251147685	0.528539487
S12000038	2011	0.461535689	0.565344502	0.59688381	0.320615362	0.167631249	0.173473632	0.599422891	1.809931756	0.294159047	0.374178121	0.242297953	0.292298223	0.358359468	0.827959261	0.775322254	0.232724504	0.83972261	0.016350938	0.10166365	0.890332717	0.939109545	0.793530689	1.161868513	0.309702318	0.49171518	0.35767812	0.119972717	0.766893537	0.072982615	2.157769899	0.0498923	0.225739222	0.213480685	0.917324538	0.648305663	0.202475685	1.594344631	0.451742975	0.283358825	0.086486221	0.294648544	0.11674113	0.315574608	0.636353642	0.325037369	0.213544432	0.239327377	0.507938806
S12000039	2011	0.45729796	0.565805801	0.590201446	0.326723796	0.159041819	0.171681649	0.5806055	1.91846994	0.297709084	0.377792175	0.243729919	0.296824624	0.347858338	0.836906161	0.783638782	0.233520531	0.844998803	0.015259797	0.099578322	0.897598105	0.932909309	0.796437931	1.171550919	0.311873769	0.493085685	0.365231894	0.115701389	0.772426646	0.07019487	2.205297045	0.049629778	0.22325368	0.214845238	0.910505701	0.662990835	0.199929188	1.577362077	0.463032822	0.279563138	0.087120421	0.296057743	0.115491741	0.303468647	0.640752612	0.332159954	0.205365694	0.229877008	0.497136609
S12000040	2011	0.445187103	0.559635517	0.581045425	0.316939542	0.156474339	0.164646233	0.576910004	1.816537314	0.296538129	0.369981869	0.232982256	0.285510571	0.3488184	0.829200194	0.767167217	0.229788842	0.829254883	0.015000884	0.099040991	0.878040225	0.928844513	0.76149044	1.144992341	0.298544567	0.471703158	0.358579547	0.115152678	0.745779236	0.06812229	2.134224836	0.050302051	0.221558057	0.201929956	0.89311245	0.649510196	0.194452656	1.578441348	0.441263621	0.270601303	0.095341555	0.281986165	0.109891047	0.290369503	0.611254552	0.328977889	0.201253719	0.227991155	0.511311758
S12000041	2011	0.475325706	0.560866071	0.603835502	0.328234322	0.168452025	0.180369053	0.600904184	1.8095135	0.300258576	0.385298291	0.251711294	0.302315604	0.356367753	0.810077801	0.787219073	0.234795259	0.849690159	0.017975174	0.09851225	0.915455158	0.940958809	0.820505054	1.182280319	0.323325228	0.50059928	0.367846967	0.119710862	0.790723005	0.070803906	2.202827405	0.048323894	0.227432922	0.221502923	0.904909362	0.65005117	0.206780619	1.6539282	0.476978975	0.286203596	0.087091363	0.306063425	0.118778918	0.323007368	0.659141738	0.322424041	0.21566192	0.244539277	0.506233812
S12000042	2011	0.462143045	0.562996662	0.604049094	0.330407195	0.166878254	0.177469359	0.603585999	1.872476067	0.2986872	0.379678106	0.250899792	0.296425748	0.355315694	0.835570012	0.78440459	0.235913991	0.843366621	0.015767393	0.101893909	0.912938457	0.955758611	0.816979143	1.192277568	0.322327039	0.497296735	0.362907497	0.118357995	0.779203856	0.072994507	2.184312948	0.04946719	0.22888085	0.218679922	0.928657067	0.666453354	0.209289794	1.540908961	0.463502529	0.289966259	0.096777028	0.304771931	0.121553766	0.317340286	0.652389132	0.323851981	0.215948026	0.239473364	0.505674107
S12000044	2011	0.446504658	0.558326644	0.5811387	0.324400546	0.156615275	0.166876649	0.574289623	1.861368116	0.295996787	0.373449965	0.238004903	0.289549413	0.345270206	0.831663058	0.772815016	0.231127156	0.83369156	0.015028715	0.100043096	0.884116202	0.931591072	0.778298803	1.156793018	0.305428536	0.478702992	0.360892381	0.11455948	0.755323263	0.068825867	2.161419286	0.050054849	0.220596214	0.206884505	0.896075663	0.655739149	0.196581767	1.552491249	0.446794499	0.274214393	0.096115918	0.288907397	0.113231849	0.294114213	0.619330681	0.330246898	0.202573637	0.228126443	0.504339908
S12000045	2011	0.492777595	0.590490549	0.624934812	0.331992562	0.181829305	0.183659541	0.632091524	1.735224801	0.298786258	0.392580016	0.249237584	0.305833309	0.37633096	0.81928824	0.801184388	0.243371584	0.872616505	0.018597189	0.102589833	0.92035209	0.966497747	0.818445988	1.189091194	0.318047511	0.511356286	0.372953864	0.124959554	0.80511765	0.076113565	2.2029761	0.052653928	0.235983765	0.223553894	0.943338773	0.647699483	0.208446925	1.81605549	0.471814542	0.292255112	0.08427326	0.30504815	0.118454367	0.334462391	0.651134741	0.329451985	0.222860156	0.257076176	0.54244175
S12000046	2011	0.414003886	0.543546822	0.557644322	0.301585967	0.155252023	0.154468717	0.561054583	1.843781868	0.276618289	0.348463284	0.22413348	0.266543184	0.341340938	0.822686984	0.721567933	0.219010741	0.787608527	0.014693187	0.105084787	0.820578022	0.886417855	0.726755019	1.100984747	0.278503227	0.460510724	0.3325434	0.112011378	0.693453799	0.073105762	2.019262368	0.04803274	0.212616453	0.196655519	0.869774165	0.619322275	0.190335043	1.39949158	0.401045779	0.269726986	0.08698798	0.273677525	0.110553548	0.286214603	0.600175681	0.316043466	0.199517856	0.21742762	0.480336662
W06000001	2011	0.474225872	0.546685437	0.592294648	0.32533638	0.169792295	0.181869316	0.596589896	1.748409356	0.290929942	0.379668111	0.247581633	0.30013894	0.351182317	0.782245013	0.760889817	0.228336766	0.82877328	0.018837756	0.09486776	0.891240883	0.920323602	0.812373578	1.15111173	0.318224135	0.493972348	0.353113431	0.119202892	0.778012554	0.071357002	2.145028059	0.045583793	0.225912389	0.21978908	0.887902622	0.625447216	0.20595082	1.594148011	0.468091932	0.285272018	0.084954829	0.301475976	0.118777184	0.330819397	0.644045353	0.30598195	0.218548231	0.246328684	0.490399445
W06000002	2011	0.451234541	0.526830044	0.572994256	0.31745266	0.163492805	0.173672251	0.571758584	1.719819287	0.284366309	0.370479538	0.24168122	0.287511775	0.333884013	0.772089691	0.748619997	0.223569434	0.807154805	0.018055372	0.094676505	0.867655441	0.899738924	0.789202433	1.129090111	0.310307055	0.476887152	0.345762079	0.113141184	0.743000659	0.069302883	2.083238933	0.046487991	0.215751453	0.213050941	0.856140089	0.612814441	0.199105187	1.514342582	0.445363176	0.278065455	0.086713891	0.29514949	0.116674366	0.31263257	0.629915537	0.303870254	0.206566595	0.237430468	0.482882394
W06000003	2011	0.475068785	0.544010387	0.598193848	0.323028753	0.172721081	0.185555465	0.600056542	1.698145099	0.292911524	0.381202737	0.254663788	0.30137654	0.347308011	0.773004936	0.771203446	0.230668888	0.831763325	0.01817776	0.09517092	0.910166795	0.928081696	0.826882436	1.168709488	0.327735078	0.502467891	0.355648826	0.118844242	0.778512673	0.072507936	2.155939495	0.047076496	0.22754814	0.225612776	0.890776306	0.631438792	0.21171206	1.564377876	0.477042367	0.290719544	0.081050349	0.311354178	0.122034571	0.334189734	0.652145428	0.308622735	0.21956074	0.246742109	0.489381901
W06000004	2011	0.458469187	0.537330137	0.581809682	0.314505208	0.166478022	0.178466466	0.582982396	1.678203117	0.289214904	0.372691583	0.244506284	0.294422644	0.339902661	0.771406029	0.757454272	0.225800726	0.818311865	0.017615242	0.09456327	0.886330162	0.912472203	0.798081449	1.143369443	0.316289879	0.484163253	0.350537817	0.116626056	0.754359337	0.070562727	2.110755791	0.04764438	0.221042402	0.215888922	0.878123948	0.626641382	0.203569901	1.552560557	0.458726346	0.279187843	0.085044546	0.298516268	0.116119152	0.317505338	0.626361955	0.311818894	0.211617745	0.237594899	0.488628042
W06000005	2011	0.454722359	0.549089451	0.581760928	0.317392913	0.161110406	0.1725814	0.580768103	1.738154869	0.292555023	0.373360994	0.238252019	0.291153615	0.344464423	0.798372863	0.766029264	0.228151754	0.824956699	0.016624737	0.096495261	0.882711275	0.922235479	0.781586199	1.144073849	0.307741556	0.480523103	0.356003585	0.115279071	0.755910987	0.068741962	2.115782099	0.048097743	0.221377659	0.209651324	0.885576135	0.635568671	0.198949315	1.573102314	0.454487079	0.274376711	0.092578307	0.289856865	0.112836186	0.305349373	0.620092744	0.319191031	0.207101281	0.233778161	0.499617154
W06000006	2011	0.440513992	0.540815808	0.569805302	0.313120737	0.156119916	0.166642205	0.569812781	1.74530339	0.28722193	0.366397251	0.232338882	0.283285927	0.339717432	0.790258493	0.743448508	0.222240516	0.809668624	0.015793197	0.09620977	0.861476183	0.906707668	0.758210557	1.122360333	0.298465394	0.470010694	0.347603543	0.113791839	0.734484255	0.068591151	2.074919935	0.047080976	0.217393793	0.203674888	0.872028455	0.625337077	0.195494387	1.515542898	0.437961561	0.26924305	0.095126665	0.281448307	0.110473163	0.295287755	0.602764661	0.316249274	0.202612622	0.227601668	0.491023792
W06000008	2011	0.451483555	0.529010853	0.571525868	0.313443364	0.165679362	0.176145969	0.57453597	1.72025105	0.285204755	0.369917656	0.244520276	0.289944357	0.335048848	0.771405423	0.743708555	0.222447325	0.804510722	0.018509088	0.094182081	0.863259079	0.892974642	0.796571451	1.125252668	0.311011685	0.476980586	0.344635407	0.116166253	0.752654444	0.068972879	2.080692232	0.044985627	0.215719815	0.217295858	0.851857008	0.608468995	0.19787168	1.509978685	0.449602255	0.280062766	0.075149692	0.297750185	0.119208153	0.322629996	0.647402588	0.300381705	0.209746087	0.238876987	0.476580951
W06000009	2011	0.465578622	0.541194919	0.588439839	0.318927849	0.170953615	0.182168027	0.58988577	1.665317716	0.289396366	0.378372805	0.246391946	0.297570489	0.344467529	0.768533581	0.763567866	0.226657325	0.826893737	0.020077938	0.094696113	0.884614532	0.918272367	0.808933304	1.142042042	0.317452347	0.490829275	0.351254194	0.118428519	0.773125	0.071215645	2.105150227	0.046788098	0.220966786	0.220254701	0.884393035	0.617528968	0.20346226	1.622194404	0.465178526	0.283532078	0.081131823	0.300862033	0.119029232	0.329902644	0.638709358	0.309414214	0.214085958	0.246089244	0.495315
W06000010	2011	0.460713893	0.541328413	0.584923949	0.321200471	0.166113632	0.177760933	0.585130263	1.723595007	0.29014731	0.375020974	0.245152119	0.293595298	0.343993877	0.781349004	0.76259104	0.227342527	0.822101407	0.017934158	0.096381143	0.885695841	0.916605067	0.800532122	1.146702102	0.316083813	0.487174419	0.352534811	0.116250714	0.766528947	0.070572876	2.11869572	0.046920656	0.221076451	0.217012097	0.878871243	0.626686486	0.203098223	1.55648276	0.459569603	0.281041178	0.086825073	0.298330537	0.117619842	0.317470582	0.640590817	0.310376284	0.212020848	0.239951772	0.490927192
W06000011	2011	0.434061068	0.528483236	0.560538791	0.303536372	0.15754996	0.16524643	0.564676858	1.723200648	0.280023027	0.355101192	0.23107205	0.277710184	0.334965738	0.781223948	0.737174123	0.220473293	0.786690366	0.0152544	0.096273444	0.8437784	0.890860788	0.759324346	1.104192258	0.295917679	0.467841723	0.337607094	0.111174645	0.718533723	0.069270643	2.019632445	0.047490902	0.214212038	0.204199586	0.852323966	0.609651093	0.194152346	1.433740407	0.430754176	0.272325131	0.081162149	0.282199778	0.112846593	0.30277881	0.610914203	0.307066887	0.202809946	0.226849667	0.474688932
W06000012	2011	0.44215168	0.542727835	0.575929564	0.321489834	0.159045205	0.172449758	0.570816682	1.813765769	0.291353594	0.370332423	0.245958827	0.288531872	0.33752896	0.806019564	0.764049065	0.227892486	0.817275516	0.015320913	0.097692853	0.882179678	0.91382579	0.7999991	1.1521434	0.314125554	0.480713187	0.352117394	0.110717853	0.763580232	0.068790001	2.136807441	0.047702898	0.217150045	0.21527698	0.874966153	0.640176652	0.199592447	1.497051461	0.455057858	0.279965643	0.090247223	0.296421178	0.11780384	0.306058421	0.630195585	0.313042091	0.204607174	0.228465022	0.483465561
W06000013	2011	0.447386375	0.546650322	0.580514208	0.317436609	0.159164937	0.172183056	0.576615745	1.765030897	0.293324653	0.372144783	0.241129694	0.292486053	0.34094137	0.800354627	0.769544932	0.229798367	0.823409317	0.015224196	0.097706313	0.886203505	0.923704303	0.789498254	1.151500644	0.310949145	0.480713862	0.355282429	0.113055209	0.75825364	0.069051076	2.133158282	0.048398522	0.220687047	0.210829977	0.885668002	0.64456873	0.200320642	1.535490851	0.454499572	0.276508233	0.089509729	0.294094365	0.115043252	0.303396787	0.619834261	0.321290781	0.205463193	0.230530188	0.494462273
W06000014	2011	0.460168473	0.551910443	0.588515742	0.31898324	0.167018227	0.175826502	0.591495501	1.694106158	0.292108729	0.373242497	0.240439585	0.292008158	0.349397683	0.798055852	0.773157411	0.231344824	0.829939433	0.016694677	0.098871972	0.888547178	0.928703872	0.790330986	1.148877697	0.311310136	0.486933276	0.355430858	0.116906952	0.763604311	0.070368681	2.128022554	0.049373444	0.223463401	0.211625117	0.901040472	0.634375189	0.201679424	1.617280648	0.453734579	0.279524225	0.089213709	0.29392684	0.114266073	0.314940405	0.62309324	0.318569125	0.209958793	0.238164166	0.507414178
W06000015	2011	0.399103505	0.513486389	0.533712369	0.280049635	0.156784863	0.149761132	0.556211261	1.600968199	0.258738605	0.326980926	0.206146909	0.246397878	0.330597591	0.767042937	0.678991596	0.20764615	0.729357476	0.014521956	0.097719542	0.766109882	0.850775603	0.673847303	1.026620211	0.258854126	0.434639189	0.30561091	0.109672632	0.640984934	0.072222132	1.809645234	0.045171796	0.20482239	0.181435384	0.837209819	0.568005038	0.18387578	1.31167776	0.366807639	0.260524586	0.090843661	0.253826247	0.103670185	0.285538186	0.550385827	0.289666507	0.196550788	0.217432881	0.470947686
W06000016	2011	0.43230489	0.531445587	0.560546218	0.315290601	0.152913351	0.165093097	0.55459878	1.784311715	0.285815766	0.361637418	0.235391305	0.281716021	0.331029038	0.794072485	0.747392339	0.223191654	0.801652143	0.014827548	0.095507794	0.856225084	0.897533219	0.770713076	1.121752326	0.302342458	0.467919487	0.346629112	0.109296914	0.736854755	0.066807397	2.085204528	0.047199031	0.213409708	0.205179072	0.853049974	0.62878088	0.192921942	1.443850106	0.43933403	0.270320019	0.090219857	0.285424595	0.11314038	0.291600206	0.606221255	0.312645112	0.198185086	0.221905652	0.478988331
W06000018	2011	0.436809926	0.539082173	0.567802668	0.323497614	0.154664849	0.166281375	0.560493245	1.80301205	0.289629465	0.367166754	0.236921874	0.284912635	0.33480616	0.809129341	0.753719887	0.225704493	0.811327749	0.014913307	0.097626462	0.867368551	0.912231617	0.776566195	1.133009561	0.306037732	0.469880655	0.351151309	0.10959529	0.74679459	0.067368026	2.107674768	0.048203347	0.214651021	0.20664295	0.865675023	0.636928653	0.194322687	1.46788778	0.443772729	0.271917153	0.09837293	0.287221677	0.114504702	0.292777847	0.611233161	0.315595783	0.200400719	0.22392556	0.486317214
W06000019	2011	0.424820511	0.533077014	0.557681015	0.320807837	0.147933047	0.16649243	0.547433432	1.881748503	0.29034482	0.362591165	0.239579392	0.2844602	0.323998495	0.809106866	0.745553962	0.223448607	0.803391176	0.014223511	0.095751179	0.866456224	0.896327379	0.785637248	1.138940239	0.308333737	0.471921569	0.346357419	0.106805297	0.748265947	0.066500703	2.133807511	0.046349594	0.210954737	0.208344849	0.861127833	0.647076323	0.195647544	1.390057098	0.446487875	0.271929483	0.091502591	0.289468058	0.116805214	0.290426136	0.603965236	0.314310707	0.196432519	0.216200872	0.465145756
W06000020	2011	0.436254225	0.534550261	0.566418345	0.318850464	0.156071461	0.167935383	0.563243799	1.755607201	0.28743289	0.365492722	0.23813224	0.28543636	0.334400158	0.795799972	0.750821515	0.223306176	0.805274745	0.0147034	0.096538921	0.86656292	0.906668313	0.778983846	1.133350267	0.306484586	0.472085743	0.346974507	0.110579483	0.744730358	0.068193675	2.097240364	0.047661482	0.215033781	0.208205368	0.865730855	0.631265265	0.197473417	1.4752658	0.445890242	0.272346493	0.09534389	0.290878785	0.114225528	0.297350635	0.60937544	0.312698232	0.203632758	0.224824031	0.482754059
W06000021	2011	0.487070845	0.561875508	0.609792975	0.322357324	0.178157776	0.185480036	0.617746045	1.650928649	0.293992235	0.382529983	0.246331085	0.302943514	0.363630889	0.785758253	0.786156607	0.235793966	0.846146807	0.020378442	0.099149537	0.906750008	0.943781737	0.812481892	1.163869228	0.320099615	0.503174138	0.361459422	0.124487673	0.787006913	0.073193989	2.145084097	0.048652565	0.230538924	0.221407605	0.910189146	0.627631363	0.207368676	1.735075335	0.470954573	0.287585819	0.080510961	0.303126714	0.118001588	0.338019673	0.644306292	0.316439768	0.222384922	0.254562094	0.521237052
W06000022	2011	0.418496242	0.522337083	0.548231103	0.306153226	0.15150222	0.160211757	0.5507992	1.716837266	0.280787537	0.353354273	0.226019664	0.266947161	0.326305201	0.789297257	0.718806677	0.217277264	0.773775506	0.014746286	0.09602406	0.83422796	0.886985168	0.739443128	1.093945388	0.289456437	0.455954979	0.332288532	0.108516816	0.701656983	0.068470491	1.993167489	0.046376303	0.210822653	0.197259933	0.85320889	0.61135162	0.191983476	1.379455054	0.416423994	0.265711163	0.098694946	0.273748029	0.110889418	0.287312583	0.583851155	0.302853978	0.196741736	0.217993307	0.476716724
W06000023	2011	0.484360895	0.55017479	0.602054878	0.322331207	0.174210761	0.186360052	0.605995599	1.674207514	0.293654791	0.38518562	0.250438453	0.305328311	0.354527641	0.770592142	0.775877097	0.230889068	0.842423292	0.022409155	0.095333945	0.903379346	0.929571667	0.821415772	1.160901498	0.324009727	0.501267895	0.360490581	0.122719249	0.785038649	0.072147293	2.152902347	0.04700022	0.22639518	0.223897992	0.897420692	0.624712799	0.207352911	1.675581779	0.477652514	0.287496986	0.075426879	0.305707088	0.119341758	0.335938144	0.656646061	0.313002789	0.220268599	0.25387609	0.504562665
W06000024	2011	0.422985672	0.53351238	0.560357712	0.322409991	0.152005394	0.164412585	0.550930739	1.826293311	0.284460146	0.362287267	0.235840431	0.277113227	0.32820992	0.805310825	0.739838565	0.222731982	0.799351493	0.014328939	0.09715628	0.855393448	0.899624796	0.775036932	1.128794212	0.304006589	0.467297407	0.345017946	0.107744606	0.740815154	0.067356481	2.087591646	0.047495062	0.21103781	0.207135829	0.856240604	0.632973665	0.193147729	1.424705213	0.435327985	0.271089506	0.101476366	0.286804454	0.115431217	0.287317424	0.601744097	0.311445601	0.196922864	0.219716326	0.475530834
[truncated: 58 more columns]
